# Supplementary material
Source: PubMed Central journal article supplement (PMC5960965)
Supplement: AEM.00036-18_zam011188530s1.pdf [file AEM.00036-18_zam011188530s1.pdf]

## SUPPLEMENTAL INFORMATION

### Identification of a sesquiterpene synthase-3-hydroxy-3-methylglutaryl-CoA synthase fusion protein responsible for hirsutene biosynthesis in *S. hirsutum*

Christopher M. Flynn and Claudia Schmidt-Dannert

#### Contents

|                                                                                                      |           |
|------------------------------------------------------------------------------------------------------|-----------|
| <b>I. Supplemental Figures</b> .....                                                                 | <b>2</b>  |
| <b>Figure S1</b> .....                                                                               | <b>2</b>  |
| Figure S2.....                                                                                       | 3         |
| Figure S3.....                                                                                       | 6         |
| Figure S4.....                                                                                       | 7         |
| Figure S5.....                                                                                       | 8         |
| <b>II. Supplemental Tables</b> .....                                                                 | <b>9</b>  |
| Table S1.....                                                                                        | 9         |
| Table S2.....                                                                                        | 12        |
| Table S3.....                                                                                        | 15        |
| Table S4.....                                                                                        | 16        |
| Table S5.....                                                                                        | 24        |
| Table S6.....                                                                                        | 36        |
| <b>III. Supplemental Data Set</b> .....                                                              | <b>37</b> |
| Fungal sesquiterpene synthase genomic DNA sequences.....                                             | 37        |
| Fungal sesquiterpene synthase coding sequences.....                                                  | 47        |
| Cloned Cytochrome P450 Reductase CPR1 from <i>Stereum hirsutum</i> .....                             | 55        |
| Accession number of protein sequences of <i>S. cerevisiae</i> S288c mevalonate pathway enzymes ..... | 56        |
| <b>IV. Supplemental References</b> .....                                                             | <b>57</b> |

## I. Supplemental Figures

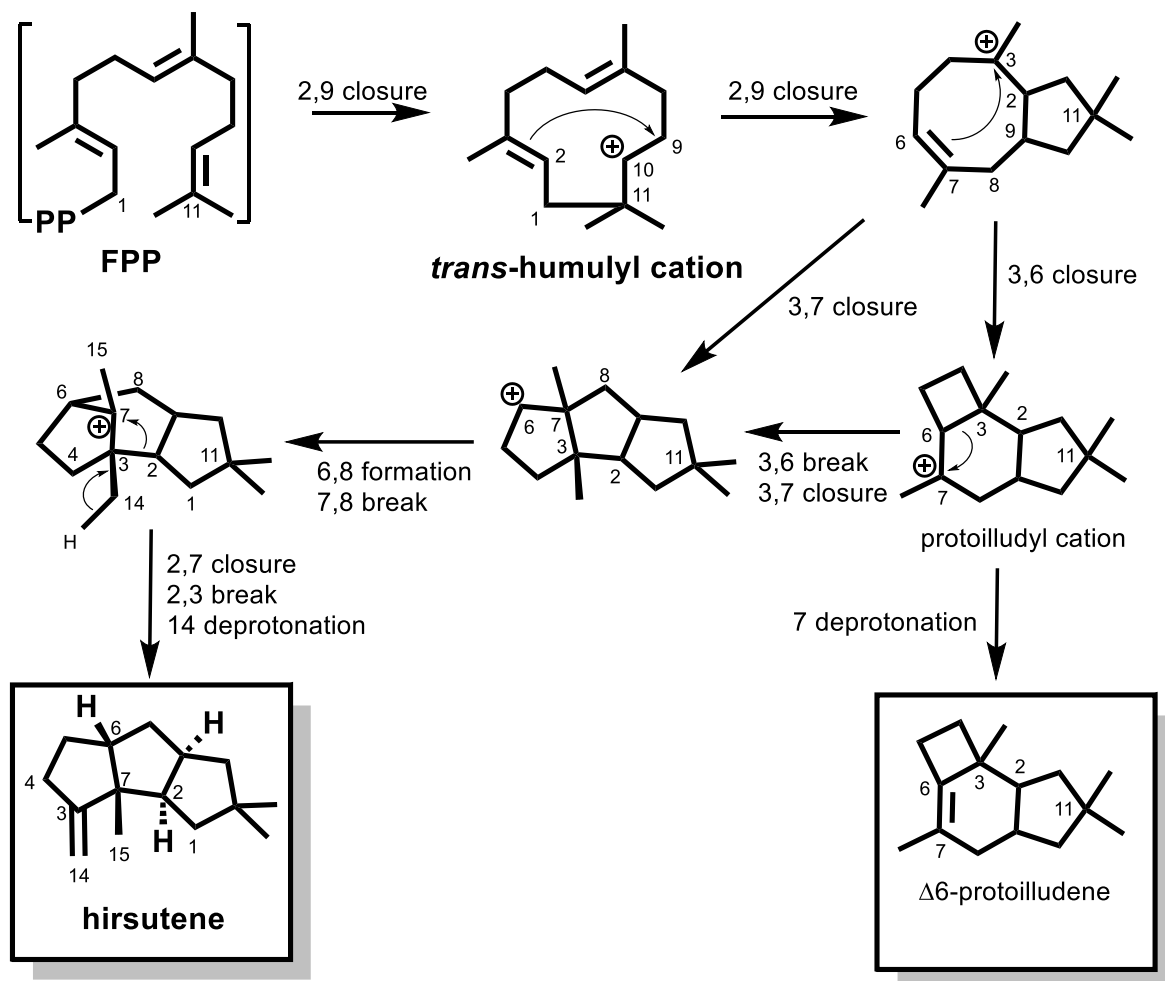

**Figure S1**  
**Possible cyclization pathway to hirsutene.**

In the absence of mechanistic studies, two plausible cyclization pathways leading to hirsutene are conceivable (see also: (1)).

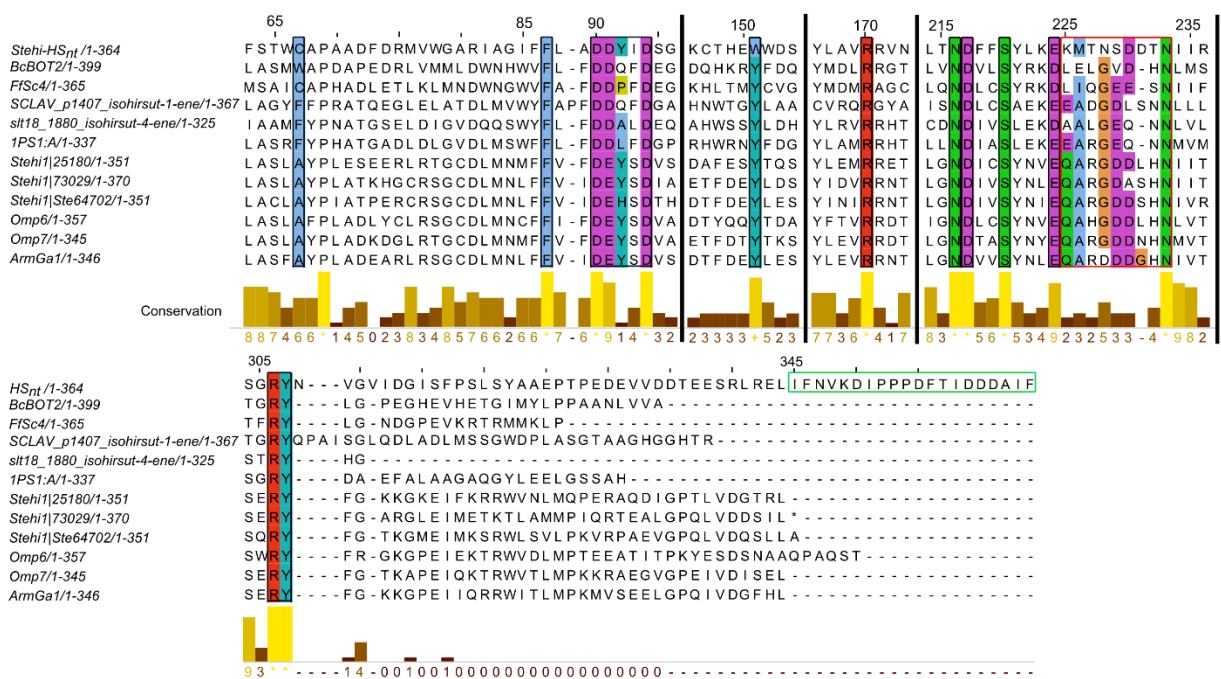

**Figure S2**

Sequence alignment of the N-terminal hirsutene synthase (HS<sub>nt</sub>) domain of bifunctional HS-HMGS with functionally characterized 11 cyclizing sesquiterpene synthases from fungi and bacteria. Key active site motifs of the conserved Mg<sup>2+</sup> D(D/E)XX(D/E) and (N/D)DXX(S/T)XXX(E/D) binding motifs are boxed in black. The highly variable H-α1 loop is boxed in red. The putative 20 amino acid linker sequence between the sesquiterpene synthase and HMGS domain of HS-HMGS is boxed in green. Residue colors show physico-chemical conservation at 90% or higher using the Clustal convention. Overall physico-chemical conservation at each amino acid position is also shown graphically below the alignment, with tall yellow columns showing complete conservation (\*) and short, dark yellow columns showing low conservation (1), and no bar (-) showing absence of chemical conservation (See **Figure 2** for accession numbers).

**A**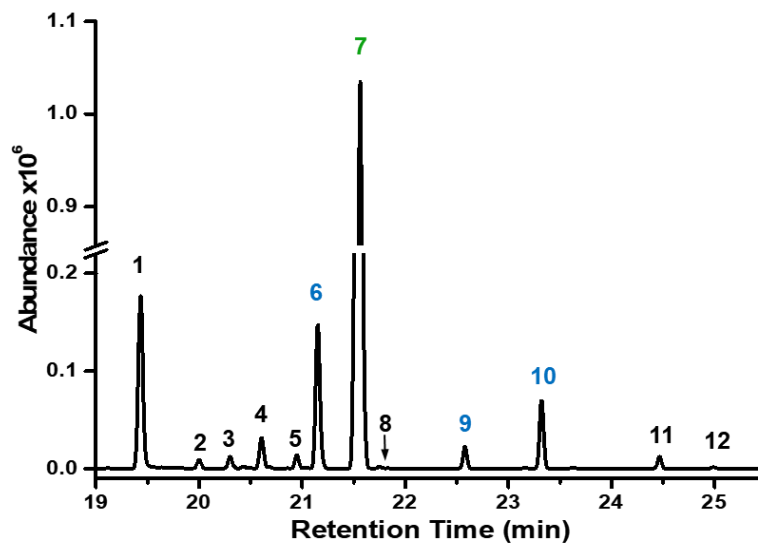**B**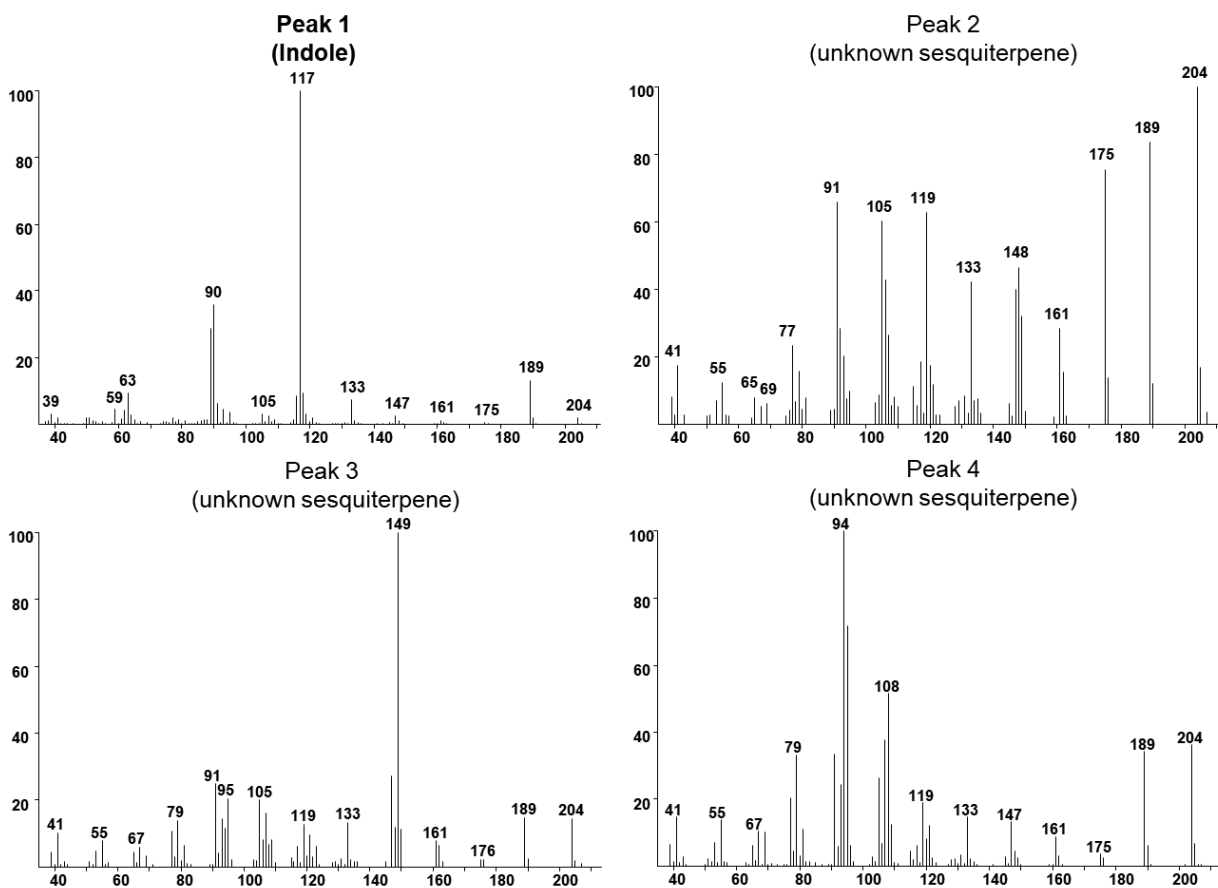

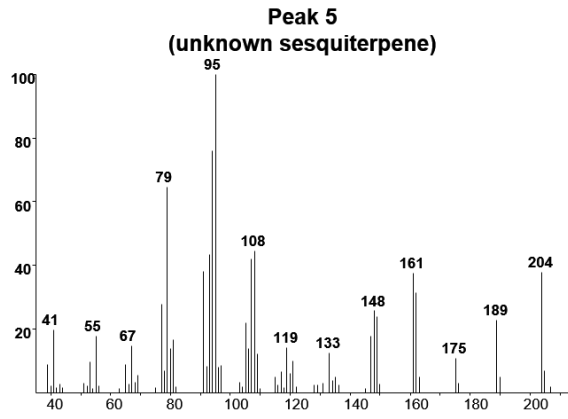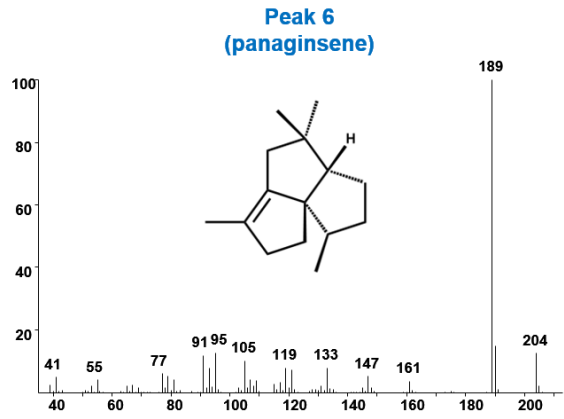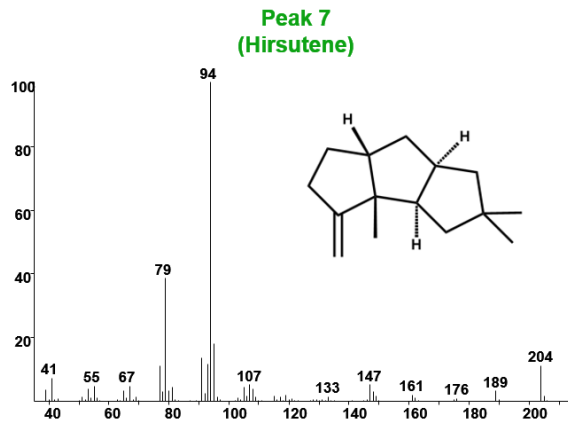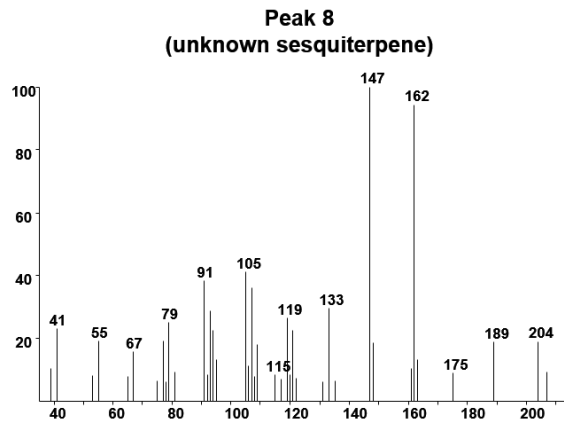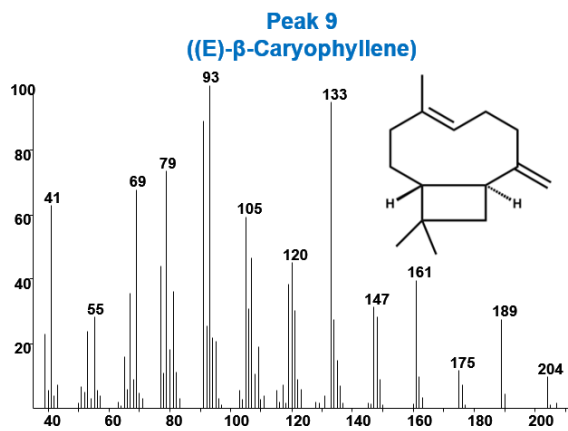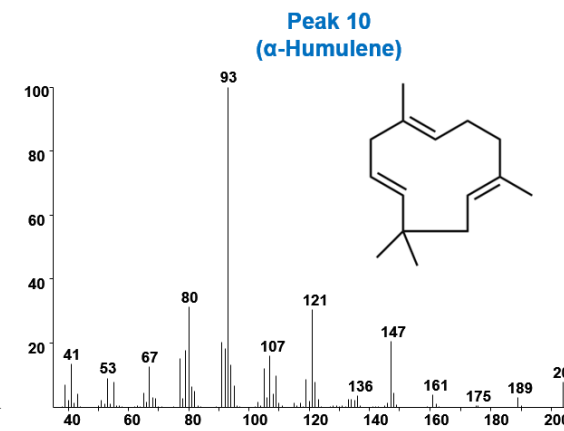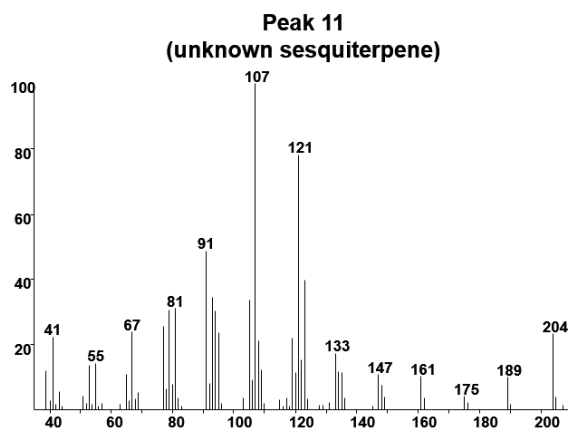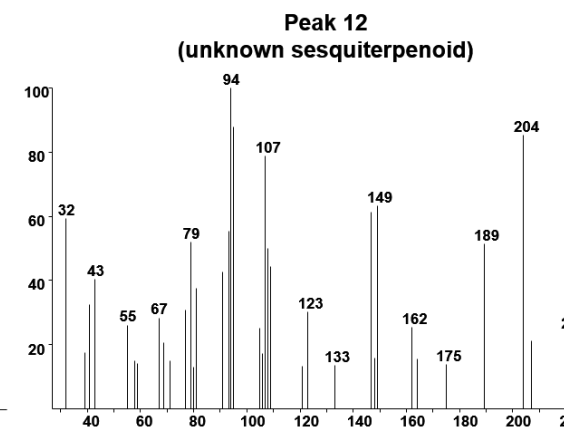

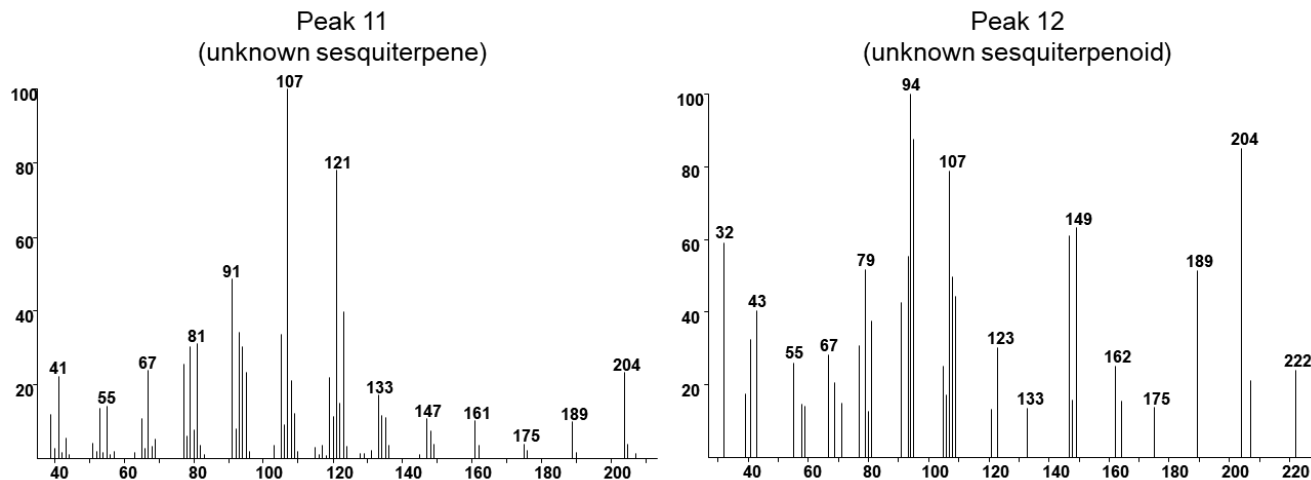

**Figure S3**

**SPME GC-MS analysis of sesquiterpenes in the headspace of recombinant *E. coli* cultures expressing HS-HMGS.** A: GC profile of separated compounds. B: EI-MS fragmentation of each peak. Peak 1 is indole, a product of *E. coli* tryptophan metabolism, and peaks 6, 7, 9, and 10 correspond to the major products panaginsene, hirsutene, (*E*)- $\beta$ -caryophyllene, and  $\alpha$ -humulene, respectively.

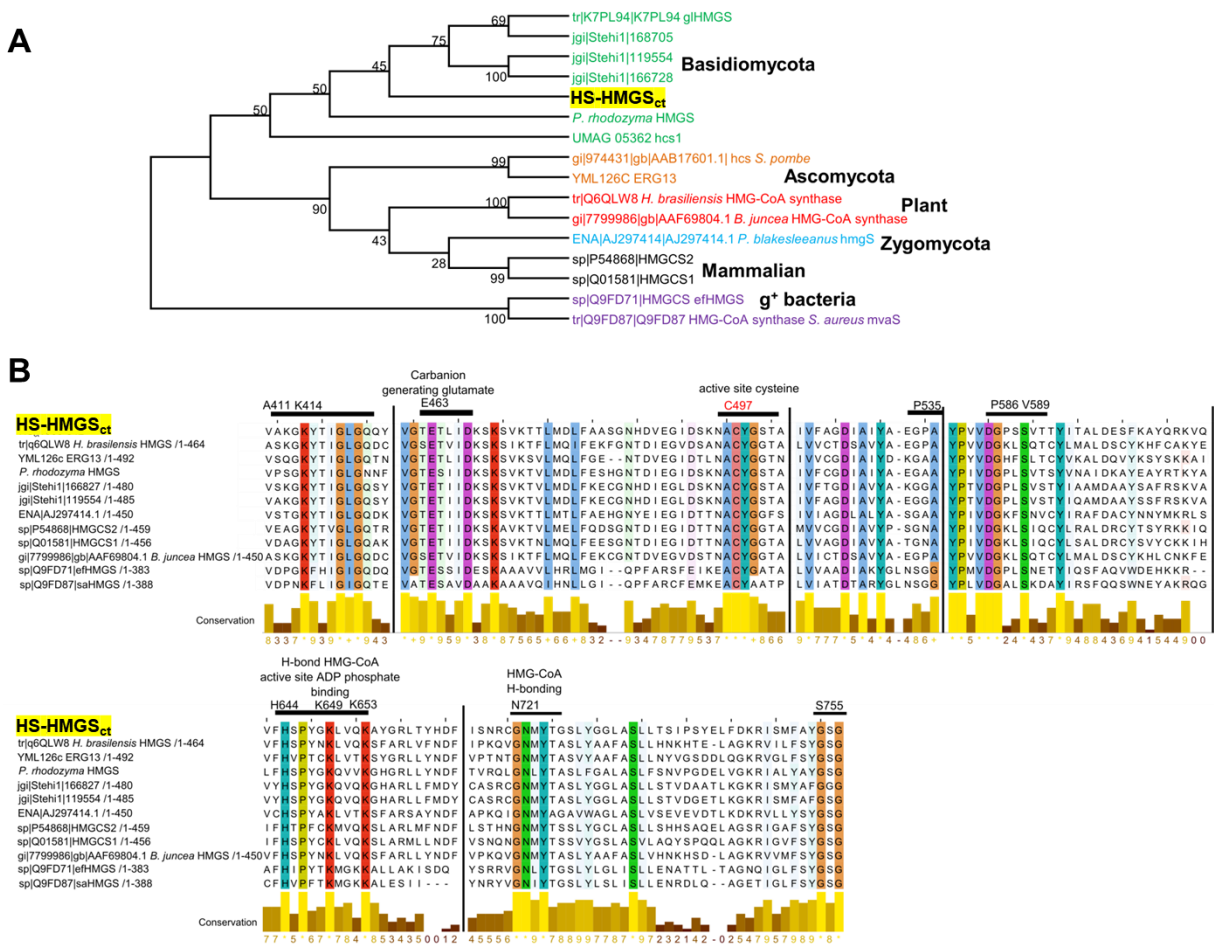

**Figure S4**

**Phylogenetic analysis and sequence alignment of the C-terminal HMGS domain(HS-HMGS<sub>ct</sub>) of bifunctional HS-HMGS:** **A:** Maximum likelihood phylogenetic analysis shows that the HMGS domain (HS-HMGS residues 365-842) is most closely related to HMGS sequences from Basidiomycota (green), including *Ustilago maydis* Hcs1 (um05362) (2), *Phaffia rhodozyma* HMGS (E509999) (3), *Ganoderma lucidum* (gHMGS) (K7PL94) (4), and three putative HMGS identified in the *Stereum hirsutum* genome (jgi|Stehi1|168705 and jgi|Stehi1|119554 are clustered with protoilludene synthase Stehi1|25180 (5) whereas jgi|Stehi1|166728 is not located in a biosynthetic gene cluster, and is likely involved in the synthesis of housekeeping isoprenoids). HMGS sequences (name ID's represent accession numbers) from other phyla include representative examples from: Ascomycota (orange), plants (red), Zygomycota (blue), mammals (black) and gram-positive bacteria (purple). **B:** Sequence alignment of HS-HMGS<sub>ct</sub>, two putative *S. hirsutum* HMGS in sesquiterpene synthase (STS) biosynthetic gene clusters (jgi|Stehi1|168705 and jgi|Stehi1|119554), with biochemically characterized HMGS enzymes. This alignment shows conservation of catalytic motifs (horizontal bars above alignment), including the active site cysteine C497. Residue colors show residues conserved at 90% or higher using the Clustal convention to show conservation of amino acid chemical properties. Overall conservation of physicochemical properties at each position is also shown below the alignment, with tall yellow columns showing complete conservation (\*) and short, dark yellow columns showing low conservation (1), and no bar (-) showing absence of conservation.

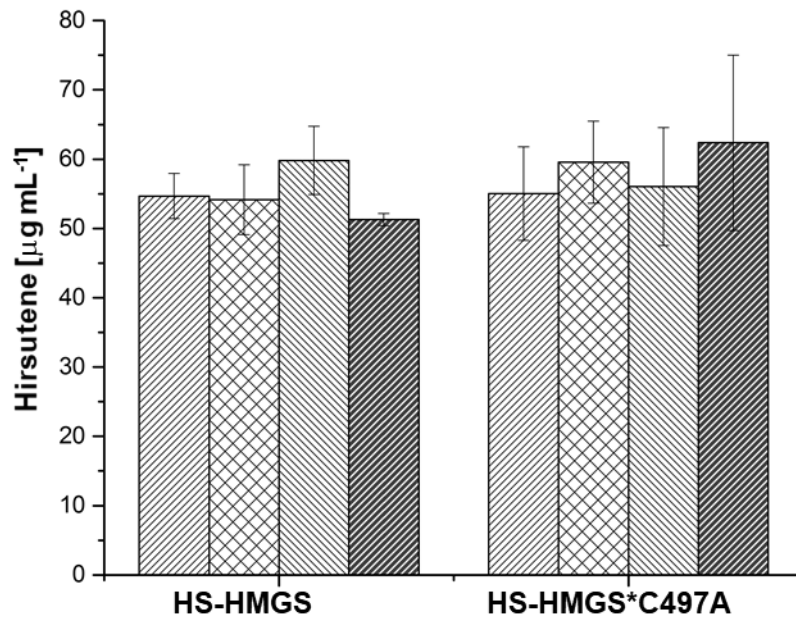

**Figure S5**

**Hirsutene production levels of *S. cerevisiae* strains expressing wild-type HS-HMGS or mutated HS-HMGS\*C497A.** Four transformants (biological replicates) of *S. cerevisiae* pESC-HIS-HS-HMGS or pESC-HIS-HS-HMGS\*C497A were cultivated for 48 hrs in galactose induction medium with a dodecane overlay to collect volatile hirsutene sesquiterpene product. Hirsutene production of 3 technical replicates for each biological replicate was quantified by GC-FID per mL of culture using commercially available  $\alpha$ -caryophyllene as a standard compound.



## II. Supplemental Tables

**Table S1**

**HS-HMGS biosynthetic gene cluster protein predictions.** Protein sequences from Augustus (6) gene predictions are given for each predicted open reading frame (ORF) in the biosynthetic gene clusters surrounding HS-HMGS (HS annotated as Steh1|52743 in the *S. hirsutum* genome (7) available in the Joint Genome Initiative (JGI) Database). Genes encoding sequences highlighted in bold were amplified from cDNA. Functional annotations were done as previously described in (5).

| Gene no. | Top conserved domain(s) | Predicted function                                     | Amino acid sequence                                                                                                                                                                                                                                                                                                                                                                                                                                                                                                                                                                                                                                                                                                                                                                                                                                                                                         |
|----------|-------------------------|--------------------------------------------------------|-------------------------------------------------------------------------------------------------------------------------------------------------------------------------------------------------------------------------------------------------------------------------------------------------------------------------------------------------------------------------------------------------------------------------------------------------------------------------------------------------------------------------------------------------------------------------------------------------------------------------------------------------------------------------------------------------------------------------------------------------------------------------------------------------------------------------------------------------------------------------------------------------------------|
| 1        | cd06660                 | Aldo-keto-reductase, 2X domains, predicted gene fusion | MTSPKYPTRQLGANGPYVSAIGLGAMGIGAYGETDYDETDFKMLTYACDNGVTFWDTADIYGS SMHTSISSRDSASEAERSMMFIFPGEETLGKWFFASTGRRSEIFLASKFGASGMRDESERPEAPNE NGIPPPNSKPSYILRQLQRSLLLQTDHIDLYYQHRPDPHPVPEVLETLRPAFEDGRIRWFGISEC SVDVRRRAKAVKGLGEKFCVQMEYGPPELVHERSGLLAEVEKLGVGVVAYSPLGRGLITGKFRS RADFEKGDRLRLLPRFDEANFPANVRLADQMKNLTKYNATSAQLALAWILAHEHPGYIPIPGSRT IERLRENMESANLATKLSPEIDIREIRDWVDKADVQGSRYPSFFQRSNECGKLEDWRGQGRSLH ALLISFEGKPPPIHVCLRLCCDYPTNTKTLPTIQAHYARQLPGRHIISCVRRSTLAPSSASALATVI QERRKGTVVWVTSYKSIATVRSILPTQFRLESSGLMTFPTRQLGANGPFRVSLGYDAAGIGECY GKTDYDEAFKMLTYACDNGVTFWDTADIYGSMTSPPEGYATPVAEKRVTFVFLGEETLGKW FASTGRRSEIFLASKFGAADMRESEPEAPNENGLPPPNSKPSYILRQLQRSLLLQTDHIDLYY QHRPDPQVPIEVVLEALRPAFEDGRIRWFGMSECLDVVRRRAKAVDELGKVICVQMEYGPPELV HERSGLLAEVEKLVAVGVVAYSPLNRGLITGKFRSRADFEEDHRLRPRFSEANFPANVRLVDH MKSMAAKYNATSAQLALAWILAHEHPGYIPIPGSRAIERLRENMQSAYLAALKSPEDIREIREWVD KADVQGDYVIFQRPNECGKLEDWKGEY |
| 2        | cd05371                 | NADB_Rossmann Superfamily                              | MAFNKVDRRYIMVQISGNTFVVSGGASGLGKGAVEVLLDGGANVILDLNEASGSALQAEYPN RVVFPKVDVTDVSVDEALHQASLVFPRLSGAVLCAGIMSVGLTAAALPEYSAPYGVQDIGALK KLLDVNIIIGTFNVAQQVSQRIVTQEQQNTTQGETGAIVLMSYSTDGQSGSVGYSATKGAISS MVLPMARDLARYGIRVNAIAPGVFLTPINDAFVKESTKCGEWPVPRPGKPTFGRFVAHIFENEM INGAVLRQDAALRGAISID                                                                                                                                                                                                                                                                                                                                                                                                                                                                                                                                                                                                                         |
| 3        | cl02310                 | Glycosyl hydrolase81 superfamily                       | MSLTLPIEEMVRLRMSVRLGTDGRLLTNMQPILPSVASSSSSSGRLQSNLKLHFNGTADATGTLC LDIWAEDDVFSSTSSVLTPTDPEPAQQLPMPQSDVAPGTMFPDPSTFSFGSGYGQATDLS NFSQSNLGAISGNQWFDQNIADIDMTDLFCELASSQSNMLWPSQFDMTQRMPYDDITGK DMSSIIHPVDDGGQAIMDALFPTPLTETSSPISTSTSCQSTPDMATLPTIPEPSPDQENINHS HSDVDDSPLPASPASTLTEEQTQSGVPGSTSRFPCLPEPCTLRFRTRKRVHMETHTRAKQ QRKSFVCGVAGCGECFSRKHDLRHEVKGHGQCEWTCRQCGRFSSQTTLRHMMMDAGHR NERVQ                                                                                                                                                                                                                                                                                                                                                                                                                                                                                                                    |
| 4        | Pfam06703               | SPC25 signal peptidase 25 kDa subunit                  | MARGRKAANGTPEPATNTNSAPDTPDSSTSARAALSASGAGAAARDVIVKVNANLTELKNA CDDALKRFLARPDLFQIHTHTDVRALGWAGVFVAAGTAFYGYKVEFEESKPVMWVGLIVYM VLTTLQALYAYFIEGIEIIFVGRKRTFDKRLITERITSSRTTPASSPPSSQLPFPLSLFTSPSTNPAPT SSKSAPAHTPPKPTITNSPSYTLNLSYIRTSSAGKSLLSKQNTLDSREYARFFDEEGLVDQEGFEAW VGGVLGALM                                                                                                                                                                                                                                                                                                                                                                                                                                                                                                                                                                                                                             |
| 5        | pfam13450 COG1232       | NAD(P) binding 8 HemY membrane heme protein            | MARPHVAIIGGGLTGLSAAFHISRALPQARITLLEKSPRLGGWVRSERVQVEDTQGNASVLEA GPRTLRLPNAQSVLELIHLELKDITITPKSSLAASRFLHIPRRGLLPLHSLISLCTSPLAPLLFRAI LTDLFRKPSRQDLSTALSASFPDRRSWSDDKITDETFHSFLSRFGDAFATKFGSALVHGIIYA TDSRRLSVQAAPFLWKLKKEGKGRVALGVTRREIRDSILKRKEIDRKESGSEKVERATKDTISAGPT VSGSSSLASTSDATSSQSWAVEVGMSPHPLEKSWAEKIGAAILSRDGMETLTKLVLKRLGE REGVEIRVGDGKQVKAIFDDTGKLELTVGSTIDSEILRSDYIISALPIPVLSQILNTRTSSSAKNSL HSSDTLGLPISHLNTPPSLSTTSPTSATSTSVLNLVFASSSVLHPGFGHILIPRGPSDYHNAAK DGNLGLIGLVVFDASVEGQQDYVMSSTIIPSDHANTSLHSGDSEVGSRTESKFTKITVMLGGPY PTRPLKELSEEELKRVNLALQHLGLPGLPAPVFTKMWWNEGSIPIVFGVGHVEWAAEVGRR VKEAFSTPTPEASGGDLRLERMVVGAGVSGVSGDCIKSGREGARWVERMVRLEESQSL EGEAASKGMEIETEK                                                                                                                                                                                                                        |

|         |                      |                                              |                                                                                                                                                                                                                                                                                                                                                                                                                                                                                                                                                                                                                                                                                                                                                                                                                                                                                 |
|---------|----------------------|----------------------------------------------|---------------------------------------------------------------------------------------------------------------------------------------------------------------------------------------------------------------------------------------------------------------------------------------------------------------------------------------------------------------------------------------------------------------------------------------------------------------------------------------------------------------------------------------------------------------------------------------------------------------------------------------------------------------------------------------------------------------------------------------------------------------------------------------------------------------------------------------------------------------------------------|
| HS-HMGS | cl00210<br>TIGR01833 | Hirsutene synthase-HMGS bifunctional protein | MSETKVGKVPFPPLPGAPYPVNRHPRWKELYRLHDEWMMKYWPFSSSEKRRARIPFMNL AGFSTWCAPAADFDRMVWGARIAGIFFLADDYIDSGKMLDRIPGFKAAATGTGPLHKEDQA EICHDIVFRAIKATSHPRTFDQLTKCTHEWWSNIHEPFQNLQYLAVRRVNIAMFYFANAYF RYTLDINLTDEQVNHPLMREAEGIVSDHVGLTNDFFSYLKEKMTNSDDTNIIRILMDHEHLSYE EAKTVIEKKIRQKEQDFIGAGMAVLDNDELGKREIYRWIANLQYCMGGNLAWSQESGRYN VGVIDIGISFPSSLYAAEPTPEDEVDDTEESRLRELIFNVKIDIPPPDFITDDDAIFMTNPHSHLQ DNVVPLPRPENVGIIILEVYFPKRCISIDALEDFDGVAKGKYTIGLGQQYLAFTDDREDINSFAL SAVSSLLEKYNIDPRSIGRLDVGTEITLIDKSKSVKTTMLDLFAASGNHNDVEGIDSKNACYGSTA AVLNANVNIWIESSWDGRYIAIVFAGDIAIYAEGPARPVGGAGAVALLIGPDAPLVLEPTHGSY MANTYDFYKPRMESEYPPVDDGPPSVTTYITALDESFKAYQRKQEGSSRDVPPPYANGANG KASATKSVKLSDFDYSVFHSPYKLVQKAYGRITYHDFVAHPTAPVYRDLPTDILSKDASATLT DKSVEKFAAASAMYKQVTPSLLISNRCGNMYTGSLYGGASLLTIPSIELDKRISMFAV GSGCASTFFAIKVRGDTSHIKAKLDERLRAEMDVRPCEDYVVALKREETHNAPSYPINDSDA GLWPGSYRLEAVDGKYRRSYTVTH |
| 7       | pfam07110            | ethD homology (likely pseudogene)            | MTVRLLCFIKRLPHVSFEEDHWWKNTHGKLVASLQPIVDGKITTYQLHVNVPVASTLQAATFPV ISYDGAIEFHAETVEEILQLFGSQEYQEKVAFDEATLGFDRAAVQVMVGENHVPQPAK                                                                                                                                                                                                                                                                                                                                                                                                                                                                                                                                                                                                                                                                                                                                                     |
| 8       | cl12078<br>cl00938   | Cytochrome P450 Monooxygenase                | MANISQPLSLIQDVFSSFSRPWSTLAIATIALVARSALKPKRNLPPGPKGLPLVGNLFLQPFQF WLRFTWKEEFGPIFSLNFAGQPVVVNLNSHKVTTDLLGKIARPAHPEGRSQSPRPTVNYLQKSP KVLVPHVLSPFVARMTHSHIFSLTRFIMASEILTSIFIAFSSYGDLWRKLRKAAHEGLNVRAAEAY QPLQEKDAAVLVADLLKEPLYWDDHLKRSAASTVLTAVYGMIEPKSKDDPLVVRINDLMHRLVR ATLPAGFLVEIFVPMKRLPEFLAPWKKEGLEWHRRDVTVMFQEFMDKVRGQMKAGESKPSFAA GLIEKEKHNLSKKEESWLAGTMFGAGAEETAAALSVFFLAMRPLVDMRKAQAEIDSVVGRD RLPTFEDRARLPYIRAIIVKELVRWPVGLPLGPRRAMQDDVYEGYFIPKGLTIVANVWAMNRPD TLPDFDEFRPERFLDETGTVDVVPADTHNQGHVTFGFGRRICIGLNIANQALFIDVASTLWAAS IEPALDDFGNEIVPSRNEVDEGLVVRPVPFKCKIVPRAEDVDAMLEMTEKLVCPGGVSSGRD VEVAFALYCTVHMQLVYSTPGGTAKPSDYAHRFMKSPITPLVRYTGAQKSAEFVVRQGAPH IVFFARHSSFPALDFLSPIK                                                                                                                                                                                         |
| 9       | cd05259<br>pfam13460 | PCBER like, atypical SDR, NAD binding        | MSPLPIAIVFGSGSLTGTSTVINGLLERKEFEVKVPRPSSVDKPSVELRNKGVAIIPVDLATASSD HLQEILRGANTVICLSVYTLQLGLQHIIIEAAKAVGVPRFVPCDFGTGRRGRVRLHDEKLDIQDA VKASGIGYTFIDVGFYQLHLIYTDVEKAYVPWLYEASRYVYNDGLVKTAYTDLTDIGRFVARIVA DPRTLHHVRYFSLSVFAWGEITQQDLVNLARKYGDPNVEVIRKTTADLEALVAEAEKELGT LAYWDYHYSMWVLGENRAEVAKLEGALDARELYPDYKVRPLEDYAVEFYKCKLL                                                                                                                                                                                                                                                                                                                                                                                                                                                                                                                                                     |
| 10      | cl12078              | Cytochrome P450 Monooxygenase                | MGNSSSVVSSLPESFGPMNSLYDAAGKNAYNLVGLAVLAVAVSWFTKRKPGFPFPKPGKIP FFGNVFQLPHSFTWFKTEWGEQYGPVGLNMAGQPMVVLNTGKVCADLMDRRSVIYSDR PRFIMASEILTGGMVGFANYGAVWRRLRKAAHLGLHLRAEAYPIEEREAAILVQDLDRDP GSWDGHIRRSIASTMFNVVNGESLATKDDPTVAKINALMHRVVQAAALPGRFLVEILPWMR YLPDWMASWKRKKGESFRQDSNMFKGFLQNVKNEVATGDYKPTFGSHLVYPGNPHGLSK DEEAWLAGIIFGAGSDSTAGTLGWFMMLMALYPEAQAKAQEIDRVVGRHRLPNFEDRDSL P YVVALMKEVLRWHPVSPGLPHRLTEDDWYEGYFLPKGTIVVSNYGINRDEFFPPDPDFRP ERYYNDEDLTKKAEFDDTHGQGHYSYGFRRVCGVMNLANNALFINMVSILWAVNIKCPV GPDGKTIVPDRNKFIDDGLVVRPEQFCILEPRENDVSAKLGSAANAQAVY*                                                                                                                                                                                                                                                                                                                     |
| 11      | cl12078              | Cytochrome P450 Monooxygenase                | MPNADLPLNVPLDPSVIMDSIMSRPLVSTLFAADGFQLASLSALLTVLVFVFRFSKRNPNSP QNLPLPPGPRGLPVLGNLLQIPSEHYWLKFEWIREYGPVSNLAGKPVIIIGTPKVAEELFDR RSAIYSDRPRWVLAIEILAKGMHAGVMPYGDKLRFRKAIHAGLQPRALASYHPIEERARIY LKEVSKNPTDFRNSVKRFTGAVIMSTTYGHTVTTFKDDKVFRRIFASAAARFAGSLAPGEFMD V VFPWLWYIPSWVPAGAWKKAQWAEQEDHELFTMREARANGDKQKSFISEGLSNAYG VNEEELAYIGGTISQPTDLMSSVSCFMLAMVVRWPEIQKRAQAEIDSVVGRGRFPYADQPN LPYVTAUVKTECRWRPVAPLSVPHASTQDDVYEGYFIPAGTIVISSIWSIHRDPEYPPDPSFN PERFIDEHGNEKNTKESKAFGHHLVYGFGRRLCPGATMADQAVVWFASHILWALNLDREKDE FGKEIVPDVSPLMFTSGGEASHPLPFCKISVRPGVDDFLDEIELPTAI*                                                                                                                                                                                                                                                                                                           |
| 12      | cl12078              | Cytochrome P450 Monooxygenase                | MSLSRTDVMALLGLFLVLYLSTGYTRKAKGKLPSPGGGLPLGNLQMPKRNGWLLMHEW SKTLGPIFHLNMAGQPVIVLNSNEAALELLERRSQIYSDRPRRLIMTGEIMSRNLVVGFRFSDR WKRFRKAAHAGINIRAAEAYYGIMERESALLVTELHKSPKHWDHDLQQRVIASSLFTALYGGEP MLNKNNDPIVEQINDCMHRLTGAALPGAFLVDVFPVLKRLPGWLYRPKGEGLNWYKKNAM FNNWLDVRKKDMDGNTPPSPFGRVLEAQEQQLLDREVPLAGSMFGAGSDATAGIMR WFMLAATLYPERIQRAQDEVDLVVGRSRLPTFDDRESMPYLAFCREVMRWRVAPLGV P HRLIEDDHMYGYYLPAGSIVLSNIYSINRSPEAFDDADSFKPERFLNEEGTFEVLHPETHNQGH YTFGFRACAGMHIANNLMFINAAHILWFSFNIRKAKDAQNEITPSATNYHDTGLIVRPHL WEVDIIPRGEVLQVAKERFAKGI*                                                                                                                                                                                                                                                                                                                                           |

|    |                    |                                                                     |                                                                                                                                                                                                                                                                                                                                                                                                                                                                                                                                                                                                                                                   |
|----|--------------------|---------------------------------------------------------------------|---------------------------------------------------------------------------------------------------------------------------------------------------------------------------------------------------------------------------------------------------------------------------------------------------------------------------------------------------------------------------------------------------------------------------------------------------------------------------------------------------------------------------------------------------------------------------------------------------------------------------------------------------|
| 13 | cl19922<br>cl06869 | FAD binding 4<br>super family<br>BBE superfamily                    | MATLLAFSAALASVYGVSAASSPYASVTASQWAALNSSVNGRLATSVPVIAQPCFDAYSIVN<br>SNTLAPDSEACSEVQSLWTNTTYRVTFQGTQEYQIWSERLNGSACDLDALDPTDPAAMNLTCT<br>LGSIPPYYIDVTSPEIDIQAALTFSNQTGVPIVINKTGHLDYLRSSAPGSLALWTKNLLNQTFSEE<br>FVPEGCNASVGRALTNAGAVTWIEAYKVADANNATVVGAFPTV GASGGWLFGGGHGFLT<br>GVNGVGADSSLQFKVVTPDGVYRIANACQNEDLFWALRGGGSGFVVLESTIAAHPAYDIKI<br>AVIEIQNITLDAQFEVFRVFAGLREQLAQEGWGGAFLPQYTDGTMVAVTMINPTLTDEQAAAT<br>FAPVIDYVNSINGTDGILVTANGFVPGGSYLYLQENYISTVPVGLGAFIGSRLLPLSSFTSNSSLD<br>ELITAMKSGLEKVGPGGEWPPMEILMDTPLLTPDSNNETSVPVWRSSAFVMVYGVSYEYNA<br>TAADELALMQTVHDALDYVRAVTPGSGEYNNEADILQEDWQEA YWGVQYPALLAIKQKYD<br>PYNLLTGWQYVGFDKGNSMFDRYNI* |
| 14 | cd06174            | Major Facilitator<br>Superfamily (MFS)                              | MSDSVEKGRSFQTPSPAGPEHNGQSSAPSSEAAAPAEVHVHIDPNASSFRKATVLVVCLALFI<br>DSFNTGGMIICLNIEEDLGQSPAIVQWILTA FNLTFGSFLLSGRISDIYHPKPIFISGFFIVGVFGI<br>GAGFVNNIIGLIIRALQGIGASMTIPSAISMLTSAYTDPESRGIALTFASAGTLGLCLGFVIGGIIV<br>QFASWRWVFWGIACVAVPISLLSIWLIPVQSLRMNSKNKKMDYPGVATLTASIILLIFAFSQAPT<br>FGWGTARVLA PLLVALLLVGFFWQTRLSDERALIPPKMWFIPNFLILVFSFNQIYFIGPVVLY<br>SNYYPTNYGWSPLTIGLHFLPTGIISGIIHFPRQLRPPKMVLVAGQLMAGVFGILYAFAYTRER<br>YWSYTFPAMVLAGSSVTYLVSNVGVITSVPVVKVGVGA AVFNAQQVGS AVNVAIVTTILVE<br>TTKTDPQTPKESYHGVSSAIWWIVAIGCAEIASAIFFRPRKNSLEGGGEGMETQKLQARDDE<br>VKEAVATGSAGGI                                                                 |
| 15 | cd5233             | SDR c Rossman<br>superfamily<br>NAD(P)(H) binding<br>oxidoreductase | MSVPVEDLPVTRENDVYPGIDPKPHFEGQTYAGKVVLVTGASRGIGSEIALYYARAGASLALLSR<br>TQAVLDKTKAHILEAAPKAQITTFVADVDTQAIKAAVDGTVKTFGKIDIVVANAGKADPWKKP<br>FTEYDPDNWKTVEVNRGVYNVAHFSLPHLGATSGYFLVIGSIGAQMRMPFASSYVLSKHAV<br>NRLVEYIKTENPNVKTFSLNPGAIKTDMADNNPEAAPWLIDTLQLPAATALRVTS GKEDWLNKG<br>YLSANWNLDEVEQKWKEKIIAEDALVNRHLVVPV                                                                                                                                                                                                                                                                                                                                  |

**Table S2**

**Stehi1|122776 gene cluster protein predictions.** Protein sequences from Augustus (6) gene predictions are given for each predicted open reading frame in the biosynthetic gene clusters surrounding Stehi1|1227763 in the *S. hirsutum* genome (7) available in the Joint Genome Initiative (JGI) Database. Functional annotations were done as previously described in (5).

| Gene no. | Top conserved domain(s) | Predicted function                            | Amino acid sequence                                                                                                                                                                                                                                                                                                                                                                                                                                                                                                                                                                                                                                                                                                                                                                                                                               |
|----------|-------------------------|-----------------------------------------------|---------------------------------------------------------------------------------------------------------------------------------------------------------------------------------------------------------------------------------------------------------------------------------------------------------------------------------------------------------------------------------------------------------------------------------------------------------------------------------------------------------------------------------------------------------------------------------------------------------------------------------------------------------------------------------------------------------------------------------------------------------------------------------------------------------------------------------------------------|
| 1        | cd06174                 | MFS Superfamily                               | MPPRTNTRRLDQTLVGLSLNLAHKTPATPETVAPIFYHLNQEKIPRRST<br>RSTPYSRDSAESKTVWNAVICALNVIVACSYTISGKFNPLDRRFLRADGWP<br>SIWAWLMFLNDELVLKASYEQYIRDCCPQLIPQVLQVMGFSSVIRRAMIQT<br>PGVVEFVTKKWMVVEEQSPEDEAMKKDEASGWKYNEVAKLALGKLRALLA<br>EKRADVALIGTAVNVVNYLSSTNAFEKLGSDPSPEYQDRLLYAFLVQGKIAA<br>IVKAIAWCNKQPAENASFSPTTRIVAFSYFSMVDDLNTMDSPVWLIQAM<br>ESGLFLAMLRSRKWVSALTTSDQEETFSAAALLSTIPLYLLYPKIVIRAARKAV<br>KQVERLGLGTKETAGPLYGRWVVLKEIVEERARLLKQWENDVEFKGDQKL<br>RRDYCERCMSPAQDDGEGENTVELKRCTSLNVFYCSKECQKAHWPRH<br>KEDCKVRRTDMECGRRGIINKSERSLLEYIVREQVNQHKTIIADTVGSGPLL<br>QYLVRVSLAHTPPQVTALRYNEAYPGPTKEVDWEAVLSDSEEGSDVPDSQ<br>AGSDESEENQSDSDSGSMTSEDKIAFDKFRNMLYLEFTVPGNENPYSSSI<br>DISFWGLPLDPL                                                                                                                                                         |
| 2        | Cd03386                 | PAP2_like protein,<br>Aur1_like superfamily   | MSSIRTSLIRTNQLYVALLAGWARLDKSFSPRDTIQRLLQKHAFYSYDLAYV<br>FHILLATFWITIMGVPGFPLKGIPLFYGLLLLIPFTCQFFLPFHPIASWILTFYS<br>SRFIPTAYRPSISVSVLPTLETVLYGANISDILTRFTHPILDVFAWIPYGVAFHT<br>LPFFVGAFLWLFPSVVRLLWARTFGYMNLLGVIIQILFPCAAPWYEVIFGL<br>TPADYSMLGSPGGLLRIDHLLHSGYTVTFSNAPVVFAGFPLHAGCATLE<br>ALFLSHFPQTTFKFWGYASVLYWATMYLTHHYLIDVVGACLAIAAFYVF<br>LPDEYRGPALAPAQGLPTNGYQYVNGGSQRSKYEIYDLEAPRTRGLGIGG<br>GGRGNSSMITDAADFDLSDVSSPSDDEGDVGIAYRSPAIPSTPQSSVPLM<br>GGHSGAHAGKKGQNGSAVGGGQPRRSHKHTASIASLIRADERTEEGWS<br>PIATGGFVIPPTTRAEREAGSGRS                                                                                                                                                                                                                                                                                                           |
| 3        | Cd06174<br>TIGR00893    | MFS superfamily,<br>D-Galactonate transporter | MIMFSVYSGHRSAPSGKVTKRYRGSTSRRIKGRCYIVPCSVLPDVLPRPPVPA<br>SSPSLGCFLSRLTNPLQPTFYRASAMSGKDIEKAEESYVSEKSESGSPY<br>VVDEEAERLVRKLDMRIIPASMIYLLCFLDRSNIGNAKVLNSDVGDLSMQ<br>TLGISNSDYLTALMIFIVGYTIFETPWYMIKKFRPSRTLALLMFSWGLLTIIL<br>GCVTNYGGLVAVRFLLSFEAGLFPGLVYYLTFWYTSRERAVRIALILACATL<br>AGAFGGAIAYGVGHMNAALGHEAWRYLFWIEGVPSCVSAALLVIFILPDFPE<br>NSTWLSPSDRTLASARLQGMASLGHSTITWAEAKQTLLDWRLYLHYLYYIS<br>ISVPFSSISLFAPTIVAGLGYEGLDAQLFTVPPYAIAFVITVAVAVWSDRYEAR<br>AWGAFISLVIAGVSFLIEGALPGDSFKARYGMLCMAVTFASFAPPLSWLT<br>ANLRSTGASTLAVPLNVSIGQLGQIVGVYIFKSSEAPGYPTGHFTNAGFILEG<br>AVVVLVLRYYIGVAWDRLRAVEQSGSARTQASRVSVRSRRLSPLPTTTC<br>DTYFTLNPVATAVENDDEGPKEYVVEEILKAKVGRGSKKAYVRIVTYEIR<br>AQYSALLTCLAYEIQFVRVAYCLNRNTTSKYAFGFWKGYGPKDNTWEPR<br>ESFASSPKLLDRFWARFDKGPQIATLKGNEELTPGKPAVAIEDDDDDDEEEE<br>APKRTPKAKRSITKENPSPASTKRKRGRPSAAESTTSKRRKSNA |

|                       |                                 |                                                            |                                                                                                                                                                                                                                                                                                                                                                                                                                                                                                                                                                                                                                            |
|-----------------------|---------------------------------|------------------------------------------------------------|--------------------------------------------------------------------------------------------------------------------------------------------------------------------------------------------------------------------------------------------------------------------------------------------------------------------------------------------------------------------------------------------------------------------------------------------------------------------------------------------------------------------------------------------------------------------------------------------------------------------------------------------|
| Stehi1<br> 12277<br>6 | CI00210                         | Isoprenoid biosynthetic superfamily, predicted STS<br>C1   | MSAAYHVSFDMSTAKPEIPPMESFPPINVPREAEIIKVCNNYVAEHFPFN<br>NDAEVKHFNGMEIPAYACRVVSFARDHEKMRKVSILIVFYFIFDDWVDKN<br>GMKLDKSTVMALLPPPSEVPIKPPQAGKMTLSDISAELYGAVRDDMPKAD<br>YDRMVNDMMEYLRVQRMAPGYNTLQELDLRSGEVGVYVLFRIIYAME<br>LSVSGKELDDPLVKRAQVLGSEAGVLRNEASSYVKEVNEGSAHNVITKLQ<br>EWSGCTEKEAMKQVLDIAIEKRQEELREMCLKVTEAPHLSEDCKTFVKTIPIYI<br>VAGNTWWHHHVCLNPSTPALLADALPLAGKVEICRGSRGDCALEYGRV<br>AMSLSILF                                                                                                                                                                                                                                          |
| 5                     | Pfam00348                       | FPP synthase                                               | MLSSMPMPTNIPTGHAKVNGCGPKTGATNGYIALPKVTIPSGGAWTAAE<br>EKALLEPYTYLASAPGKGVKLLVDALNVWLQVPTEQLVVIANIVDMLHLS<br>SLMIDDIEDSSELRRGNPKGHPISIRLGLGPHDTLRPAHHVYVGPQTIN<br>TAEYVVFVAIGEVAKLRA TRPDNEHGLHKIVNDELQNLHRGGQLEIWRDS<br>LKCPSEEEYIDMANKKTSGLLRIACRLMMGCATSNVGTDYVPLINTLGVFF<br>QIRDDLLNDDDEYAKKGFADLSEKGFSPFIVHGIQASPSDNLILQVLKDR<br>PTSPDMKIPAINYLDRDGHSTFQYSRVVLSLELQMKKEIARLGGNEKLSRIK<br>HLSVQV                                                                                                                                                                                                                                         |
| 6                     | CI12078                         | P450 superfamily                                           | MSFGVTPTLDEIALLSTLPCGVNEIRFQQSFRSFKSVKFDYYSKFWRKLIDFY<br>PIPALTFSPLAPSKDIMLEKLFHLSALGVTQYRLKDCALAGTYALGLVLIVRR<br>ILMGNRGLSPGPKGWPIIKNILDIPAQYQWKTFLKWSREYRSDVISLKVPG<br>ATLVVLTNTKAVDDLMVKRSHIYSSRPRMVMLNEVMRHDWIFGIMPYG<br>DRWRASRKLFSQYVDKNGIRPHQLTAVRRFLPRLATGSAEDLDGKRLRVA<br>GDFILSSAYGLDIRDADNHVRLSQDALMSIIPGVHLGGYVVDIFPMLKHLP<br>AWFPGAGFQRIASKSREMYEARHAPFKFAQEQMEKGTAKPSLTSALIQS<br>LDKDKTPDYDCRLEAVQDVFATMYLAGSETTIAMRNFIWAFAAFLVLK<br>GQMAVDSFLDGRLPTEFDRKDLPYVDALVEETLRWGGGFSFIGVPHCTSED<br>DYNGYFIPK GALVLANIWAVLQDENIYGPKTERFQPERFLYEDGTFNAEID<br>ADPEFGFRRVCPGKDVVREALWILIASFLAVFDIHDVAVGEDGKPIDVDKIA<br>NLRSKSTSFLRLLPHD |
| 7                     | CI10013                         | Glycosyltransferase _GTB_type super family                 | MSSHIIAIPFSAWGHTRPAIAFLVQLLKLDPDLSTTLITAKSIEENCRAEVIFQL<br>TSAGLKDDPRMKIVSLEANYFMGPDGYLEPMKDAYAKIVKDYPAAQAVIVD<br>LGFVFPFIEHIRPLSPAETTVKIAAWWPIMVSMFHTPPLCTFN DATIGAFMM<br>KLGCGMASGDDYLTASGKCWADEIVGKKINIPGLPEMSDYECYVQEPFTL<br>PSFVLTDMWKGQQSDVLLTSSSHCLEREGIATIAKVLKAGRAVERVFAVG<br>PLLPAESKKVLDLERTGSKAGDLNVFLDRIVQEKGPKSVLYISFGSMFYPAQ<br>PEMVFTVLRVLLGLNIPFVLVHRAESPPLPTALRESIEASPLVLTQWGPQQ<br>YILSHPATGWFLSHCGLNSVQESLASGIPLICWPLFADQPLLSIMVSQVLNC<br>GFELSEVRQGFGLKYRQSTGKTPTGTLEAVAAEEAREVLKAAFFDQEKRAVK<br>EEGARKMQLLNDAWKKSGEAKKDTEAFVQFILA                                                                                    |
| 8                     | Pfam00067                       | P450 superfamily                                           | MSKRIRIFTPSDVAEHNTESIWVSQYQGVLDVTSFLPDHPGGEEFILRHAG<br>KDVEDVMKDADEHVHSESAYDMLEEFVIGRLGAGEMVVSDDWVPADDF<br>HPDNTDEEKDFEKNQFLDLRKLFRQM WYANFRAKRISSRFSLVTSQSRR<br>ASSVLTLSWYVIPTIWLPI TAYLALRSLQLSGFVLP LFSANPFAPFTALVSSP<br>SGIPITSGALLSFAACFFVGNVIWTLLEYGMHRFLFHIDYLPDKPMLFTLHF<br>LGHGIHHYMPMDRTRLVMPVFLFTTLQAPFTRLAHTLFPASIANGIIAGSFF<br>MYVVYDCSHYAMHHTKLPAYLRETKKYHLAHHYKNFELGFGVTSKIWDIV<br>FNTVLP I                                                                                                                                                                                                                                 |
| 9                     | CI01132<br>Pfam00173<br>COG3000 | FA_hydroxylase superfamily, Cyt-b5, ERG3 sterol desaturase | MSKRIRIFTPSDVAEHNTESIWVSQYQGVLDVTSFLPDHPGGEEFILRHAG<br>KDVEDVMKDADEHVHSESAYDMLEEFVIGRLGAGEMVVSDDWVPADDF<br>HPDNTDEEKDFEKNQFLDLRKLFRQM WYANFSKAYLQVHQPRHLPE<br>PARLFGPDYLEVFTRASWYVIPTIWLPI TAYLALRSLQLSGFVLP LFSANPFA<br>PFTALVSSPSGIPITSGALLSFAACFFVGNVIWTLLEYGMHRFLFHIDYLPD                                                                                                                                                                                                                                                                                                                                                              |

|    |           |                                            |                                                                                                                                                                                                                                                                                                                                                                                                                                                                                                                                                                                                                                                                                                                                                                                            |
|----|-----------|--------------------------------------------|--------------------------------------------------------------------------------------------------------------------------------------------------------------------------------------------------------------------------------------------------------------------------------------------------------------------------------------------------------------------------------------------------------------------------------------------------------------------------------------------------------------------------------------------------------------------------------------------------------------------------------------------------------------------------------------------------------------------------------------------------------------------------------------------|
|    |           |                                            | KPMFLTLHFLGHGHHYMPMDRTRLVMPVLFSTLQAPFTRLAHTLFPASI<br>ANGHIAGSFFMYVVYDCSHYAMHHTKLPAYLRETKKYHLAHHYKNFELGFG<br>VTSKIWDIVFNTVLP                                                                                                                                                                                                                                                                                                                                                                                                                                                                                                                                                                                                                                                                |
| 10 | No hits   |                                            | MQNPADEIASVVKLVTTPSPDVQKRALERDAGFRHPLCTVPSAHSRES<br>VIGIQWYRIMSPKIELEVNSVSYDKEKGKVFVDVTQKFHIRFNPLPATPARL<br>SVHLSLREENGLYYIALQEDFYHPDDLISLVIPILASPAHMALRAGAISSNIFA<br>RVFQVTFGWWQPSTGERVGS                                                                                                                                                                                                                                                                                                                                                                                                                                                                                                                                                                                                 |
| 11 | Pfam13450 | NAD(P) binding,<br>Rossmann-like<br>domain | MASSSTVRALRAVKHDIELFNQTSAKLFKQRRFLRLNPMRVAYLLLDIFYIA<br>IQLVILFFFKPPVPKSDDELKKPFGKIAVVGAGLTGISSAAHCVSHNFDVVIFEC<br>MSAISPSVTHLKQQLTFHLVVTLASDRPGGIWAHVNKTSGLQNSMLYRF<br>HPSLLWSLAFPQRDDIVGEITRIWKEYRLESRTFRNVCPFSSSPSFLSSHERPI<br>FIDVHLFFVQTPVTSAPRAGSSSPGSKWIINDNEDEMFDIIVTIGTCGKP<br>QMVGFPGMPKDKAPPKKEKGGDEKKQKQKQENGKSQEDHHEPKEKD<br>DSPEIDSSPTQDSGSLPSPTDPRQAGAPSYSAMAKTEPTGENHVVAQGD<br>GADELREESPDGKRPGEPADEGNQDEDEEVEYEQMLHSSSELDDKDVKGG<br>TVVVVGSGASGVEAVETALDRGAKEAIMIARDDKWIIPRNIIIVDTAISAQPF<br>GREMPLSFLWEGFLKHWHYRGVEDLVPVDKGIYEGTPVVNDDFLQHVRS<br>GSCTYIRGDTLRLTKSGVEVRVRPRGSKPGDKGSPHSPPEKSNKSNAYPI<br>KEIKGEAVVLATGFEPKPSVDFLPEDLFPDYGGRPNLYLQNFATEDWSILMT<br>NSSYLNAIGTVGHIHIGIYTRILLIFLMDEYARPPPKDMKLWVDAIGFVKRG<br>AKGGALGFFTYMELTIWFLFHIFRPDRIRWVFFSMQGWGLNVNKINAKA |

**Table S3**

**Representative HMG-CoA synthase (HMGS) and reductase (HMGR) protein sequences.**  
Sequence names and Accession numbers (JGI fungal genome database or GenBank).

| <b>HMG-CoA synthase sequences</b>                                                                                                                                                                                                                                                                                                                                                                                                                                                                                                                                                                 |
|---------------------------------------------------------------------------------------------------------------------------------------------------------------------------------------------------------------------------------------------------------------------------------------------------------------------------------------------------------------------------------------------------------------------------------------------------------------------------------------------------------------------------------------------------------------------------------------------------|
| HMGS domain of HS-HMGS <i>Stereum hirsutum</i> (STS gene cluster) (This study)<br>MTNPHSHLQDNVPLPRPENVGIIGLEVFYFKRCISIDALEDFDGVAKGKYTIGLGQQYLAFTDDREDINSFALSAVSSLLEKYNIDPRS<br>IGRLDVGTE TLIDKSKSVKTTLMDLFAASGNHDVEGIDSKNACYGSTAAVLNAVNWIESSSWDGRYAI VFAGDIAIYAEGPARPVGG<br>AGAVALLIGPDAPLVLEPHGYSYMANTYDFYKPRMESEYPVVDGPPSSVTTYITALDESFKAYQRKVQEGSSRDVPPPYANGANGKAS<br>ATKSVKLSDFDYSVFHSYKLVQKAYGRLTYHDFVAHPTAPVYRDLPTDILSKDASATLTDKSVKTFAAASAMYKQVVTPSLLISN<br>RCGNMYTGSLYGGLASLLTSIPSYELFDKRISMFAYGSGCASTFFAIKVRGDTSHIKAKLDLERRLAEMDVRPCEDYVVALKREETHN<br>APSYIPNDS DAGLWPGSYRLEAVDGKYRRSYTVTH |
| Stehi1 166728 <i>Stereum hirsutum</i> FP-91666 SS1 (STS gene cluster)                                                                                                                                                                                                                                                                                                                                                                                                                                                                                                                             |
| Stehi1 119554 <i>Stereum hirsutum</i> FP-91666 SS1 (STS gene cluster)                                                                                                                                                                                                                                                                                                                                                                                                                                                                                                                             |
| Stehi1 168705 <i>Stereum hirsutum</i> FP-91666 SS1                                                                                                                                                                                                                                                                                                                                                                                                                                                                                                                                                |
| NP_013580.1 HMGS1 <i>Saccharomyces cerevisiae</i> S288C                                                                                                                                                                                                                                                                                                                                                                                                                                                                                                                                           |
| XP_002491079.1 HMGS1 <i>Komagataella phaffii</i> GS115 ( <i>Pichia pastoris</i> )                                                                                                                                                                                                                                                                                                                                                                                                                                                                                                                 |
| Q01581.2 HMGS cytoplasmic <i>Homo sapiens</i>                                                                                                                                                                                                                                                                                                                                                                                                                                                                                                                                                     |
| AAB17601.1 HMGS <i>Schizosaccharomyces pombe</i>                                                                                                                                                                                                                                                                                                                                                                                                                                                                                                                                                  |
| P54868.1 HMGS mitochondrial ketogenic <i>Homo sapiens</i>                                                                                                                                                                                                                                                                                                                                                                                                                                                                                                                                         |
| AFM91095.1 HMGS <i>Ganoderma lucidum</i>                                                                                                                                                                                                                                                                                                                                                                                                                                                                                                                                                          |
| XP_008038800.1 HMGS <i>Trametes versicolor</i> FP-101664 SS1                                                                                                                                                                                                                                                                                                                                                                                                                                                                                                                                      |
| XP_001874523.1 HMGS1 <i>Laccaria bicolor</i> S238N-H82                                                                                                                                                                                                                                                                                                                                                                                                                                                                                                                                            |
| XP_001888022.1 HMGS2 <i>Laccaria bicolor</i> S238N-H82                                                                                                                                                                                                                                                                                                                                                                                                                                                                                                                                            |
| XP_001888015.1 HMGS3 <i>Laccaria bicolor</i> S238N-H82                                                                                                                                                                                                                                                                                                                                                                                                                                                                                                                                            |
| EXL58785.1 HMGS1 <i>Fusarium oxysporum</i>                                                                                                                                                                                                                                                                                                                                                                                                                                                                                                                                                        |
| EXL58784.1 HMGS2 <i>Fusarium oxysporum</i>                                                                                                                                                                                                                                                                                                                                                                                                                                                                                                                                                        |
| EXL58783.1 HMGS3 <i>Fusarium oxysporum</i>                                                                                                                                                                                                                                                                                                                                                                                                                                                                                                                                                        |
| Aspjpap1 392521 HMGS1 <i>Aspergillus japonicum</i>                                                                                                                                                                                                                                                                                                                                                                                                                                                                                                                                                |
| Aspjpap1 365674 HMGS2 <i>Aspergillus japonicum</i>                                                                                                                                                                                                                                                                                                                                                                                                                                                                                                                                                |
| Aspjpap1 317209 HMGS3 <i>Aspergillus japonicum</i>                                                                                                                                                                                                                                                                                                                                                                                                                                                                                                                                                |
| AAG32922.1 HMGS <i>Brassica juncea</i>                                                                                                                                                                                                                                                                                                                                                                                                                                                                                                                                                            |
| <b>HMG-CoA reductase sequences</b>                                                                                                                                                                                                                                                                                                                                                                                                                                                                                                                                                                |
| Stehi1 171644 HMGR <i>Stereum hirsutum</i> FP-91666 SS1                                                                                                                                                                                                                                                                                                                                                                                                                                                                                                                                           |
| XP_008041304.1 HMGR <i>Trametes versicolor</i> FP-101664 SS1                                                                                                                                                                                                                                                                                                                                                                                                                                                                                                                                      |
| XP_964546.1 HMGR <i>Neurospora crassa</i> OR74A                                                                                                                                                                                                                                                                                                                                                                                                                                                                                                                                                   |
| XP_011328582.1 HMGR <i>Fusarium graminearum</i> PH-1                                                                                                                                                                                                                                                                                                                                                                                                                                                                                                                                              |
| XP_016270872.1 HMGR <i>Rhodotorula toruloides</i> NP11                                                                                                                                                                                                                                                                                                                                                                                                                                                                                                                                            |
| NP_013636.1 HMGR1 <i>Saccharomyces cerevisiae</i> S288C                                                                                                                                                                                                                                                                                                                                                                                                                                                                                                                                           |
| NP_013555.1 HMGR2 <i>Saccharomyces cerevisiae</i> S288C                                                                                                                                                                                                                                                                                                                                                                                                                                                                                                                                           |
| AAB39277.1 HMGR <i>Schizosaccharomyces pombe</i>                                                                                                                                                                                                                                                                                                                                                                                                                                                                                                                                                  |
| NP_000850.1 HMGR <i>Homo sapiens</i>                                                                                                                                                                                                                                                                                                                                                                                                                                                                                                                                                              |
| NP_177775.2 HMGR1 <i>Arabidopsis thaliana</i>                                                                                                                                                                                                                                                                                                                                                                                                                                                                                                                                                     |
| NP_179329.1 HMGR2 <i>Arabidopsis thaliana</i>                                                                                                                                                                                                                                                                                                                                                                                                                                                                                                                                                     |
| XP_002491966.1 HMGR <i>Komagataella phaffii</i> GS115 ( <i>Pichia pastoris</i> )                                                                                                                                                                                                                                                                                                                                                                                                                                                                                                                  |

**Table S4**

**Survey of Basidiomycota genomes in JGI's Fungal Genome Database (performed 10-2017) for duplication of mevalonate biosynthetic genes.** BLAST searches (parameters: Blossom62 Scoring Matrix, 1.0 E-5, Model Proteins) were performed with HMGS, HMGR, MK, PMK and MDD sequences from *S. cerevisiae* (see Supporting Data Set for sequences). See Figure 1 for mevalonate pathway. Bold numbers denote multiple HMGS or HMGR gene copies. *Note: Individual hits were not manually verified. Some duplications may represent pseudogenes and/or allelic variants that may have been included into the filtered model protein list for certain genomes.*

| <b>Basidiomycota (307 genomes searched)</b>             | <b>HMGS</b> | <b>HMGR</b> | <b>MK</b> | <b>PMK</b> | <b>MDD</b> |
|---------------------------------------------------------|-------------|-------------|-----------|------------|------------|
| <b>Number of genomes with:</b>                          |             |             |           |            |            |
| >1 homolog                                              | 64          | 54          | 14        | 25         | 22         |
| 2                                                       | 45          | 34          | 12        | 23         | 20         |
| 3                                                       | 9           | 3           | 2         | 2          | 1          |
| 4                                                       | 7           | 4           | 0         | 0          | 0          |
| ≥5 homologs                                             | 2           | 5           | 0         | 0          | 1          |
| multiple copies of HMGS and/or HMGR: 85                 |             |             |           |            |            |
| multiple copies of HMGS and HMGR: 18                    |             |             |           |            |            |
| <b>Genome</b>                                           |             |             |           |            |            |
| <i>Abortiporus biennis</i> CIRM-BRFM1778 v1.0           | 1           | 1           | 3         | 1          | 1          |
| <i>Acaromyces ingoldii</i> MCA 4198 v1.0                | 1           | 1           | 3         | 1          | 1          |
| <i>Agaricostilbum hyphaenes</i> ATCC MYA-4628 v1.0      | 1           | 1           | 2         | 1          | 1          |
| <i>Agaricus bisporus</i> var <i>bisporus</i> (H97) v2.0 | 1           | 1           | 2         | 1          | 1          |
| <i>Agaricus bisporus</i> var. <i>burnettii</i> JB137-S8 | 1           | 1           | 2         | 1          | 1          |
| <i>Agrocybe pediades</i> AH 40210 v1.0                  | 1           | 1           | 2         | 1          | 1          |
| <i>Amanita muscaria</i> Koide v1.0                      | 1           | 1           | 2         | 1          | 1          |
| <i>Amanita thiersii</i> Skay4041 v1.0                   | 1           | 1           | 2         | 1          | 1          |
| <i>Amylostereum chailletii</i> DWAch2 v1.0              | <b>2</b>    | 1           | 2         | 1          | 1          |
| <i>Anomoporia bombycina</i> ATCC 64506 v1.0             | 1           | 1           | 2         | 1          | 1          |
| <i>Antrodia serialis</i> Sig1Antser10 v1.0              | <b>2</b>    | 1           | 2         | 1          | 1          |
| <i>Antrodia sinuosa</i> LB1 v1.0                        | 1           | 1           | 2         | 1          | 1          |
| <i>Aporpium caryae</i> L-13461                          | 1           | 1           | 2         | 1          | 1          |
| <i>Armillaria cepistipes</i> B5                         | 1           | <b>2</b>    | 2         | 1          | 1          |
| <i>Armillaria gallica</i> 21-2 v1.0                     | 1           | 1           | 1         | 1          | 1          |
| <i>Armillaria mellea</i> DSM 3731                       | 1           | 1           | 1         | 1          | 1          |
| <i>Armillaria ostoyae</i> C18/9                         | 1           | 1           | 1         | 1          | 1          |
| <i>Armillaria solidipes</i> 28-4 v1.0                   | 1           | 1           | 1         | 1          | 1          |
| <i>Artolenzites elegans</i> CIRM-BRFM 1122 v1.0         | 1           | 1           | 1         | 1          | 1          |
| <i>Artolenzites elegans</i> CIRM-BRFM 1663 v1.0         | 1           | 1           | 1         | 1          | 1          |
| <i>Atractiellales</i> sp. v2.0                          | 1           | 1           | 1         | 1          | 1          |
| <i>Auricularia subglabra</i> v2.0                       | 1           | 1           | 1         | 1          | 1          |
| <i>Auriculariopsis ampla</i> NL-1724 v1.0               | 1           | 1           | 1         | 1          | 1          |
| <i>Auriscalpium vulgare</i> FP105234-Sp v1.0            | <b>2</b>    | 1           | 1         | 1          | 1          |
| <i>Basidioascus undulatus</i>                           | 1           | 1           | 1         | 2          | 1          |
| <i>Bjerkandera adusta</i> v1.0                          | 1           | 1           | 1         | 1          | 1          |



| <b>Basidiomycota (307 genomes searched)</b>                 | <b>HMGS</b> | <b>HMGR</b> | <b>MK</b> | <b>PMK</b> | <b>MDD</b> |
|-------------------------------------------------------------|-------------|-------------|-----------|------------|------------|
| <i>Bolbitius vitellinus</i> SZMC-NL-1974 v1.0               | 1           | 2           | 1         | 1          | 1          |
| <i>Boletus edulis</i> v1.0                                  | 1           | 1           | 1         | 1          | 1          |
| <i>Botryobasidium botryosum</i> v1.0                        | 1           | 1           | 1         | 1          | 1          |
| <i>Calocera cornea</i> v1.0                                 | 1           | 1           | 1         | 1          | 1          |
| <i>Calocera viscosa</i> v1.0                                | 1           | 1           | 1         | 1          | 1          |
| <i>Cantharellus anzutake</i> C23 v1.0                       | 1           | 1           | 1         | 1          | 1          |
| <i>Ceraceosorus</i> sp. MCA 4658 v1.0                       | 1           | 1           | 1         | 1          | 1          |
| <i>Ceratobasidium</i> sp. (anastomosis group I, AG-I) v1.0  | 2           | 1           | 1         | 1          | 1          |
| <i>Cerinomyces ceraceus</i> ATCC 56525 v1.0                 | 1           | 1           | 1         | 1          | 1          |
| <i>Ceriporiopsis (Gelatorporia) subvermispora</i> B         | 2           | 1           | 1         | 1          | 1          |
| <i>Cerrena unicolor</i> v1.1                                | 1           | 1           | 1         | 1          | 1          |
| <i>Chionosphaera apobasidialis</i> 52639 v1.0               | 1           | 1           | 1         | 1          | 1          |
| <i>Chionosphaera cuniculicola</i> CBS10063 v1.0             | 1           | 1           | 1         | 1          | 1          |
| <i>Clavicornia pyxidata</i> HHB10654 v1.0                   | 1           | 1           | 1         | 1          | 1          |
| <i>Clavulina</i> sp. PMI_390 v1.0                           | 1           | 1           | 1         | 1          | 1          |
| <i>Climacocystis borealis</i> CliBor001 v1.0                | 1           | 1           | 1         | 1          | 1          |
| <i>Clitocybe gibba</i> IJFM A808 v1.0                       | 3           | 1           | 1         | 1          | 1          |
| <i>Coniophora olivacea</i> MUCL 20566 v1.0                  | 1           | 1           | 1         | 1          | 1          |
| <i>Coniophora puteana</i> v1.0                              | 1           | 1           | 1         | 1          | 1          |
| <i>Coprinellus micaceus</i> FP101781 v2.0                   | 1           | 9           | 1         | 1          | 1          |
| <i>Coprinellus pellucidus</i> v1.0                          | 1           | 2           | 1         | 1          | 1          |
| <i>Coprinopsis cinerea</i>                                  | 2           | 2           | 1         | 2          | 2          |
| <i>Coprinopsis cinerea</i> AmutBmut pab1-1 v1.0             | 1           | 1           | 1         | 1          | 1          |
| <i>Coprinopsis marcescibilis</i> CBS121175 v1.0             | 1           | 1           | 1         | 1          | 1          |
| <i>Coprinopsis sclerotiger</i> v1.0                         | 1           | 1           | 1         | 1          | 1          |
| <i>Cortinarius glaucopus</i> AT 2004 276 v2.0               | 1           | 1           | 1         | 1          | 1          |
| <i>Crepidotus variabilis</i> CBS 506.95 v1.0                | 1           | 1           | 1         | 1          | 1          |
| <i>Cronartium quercuum</i> f. sp. fusiforme G11 v1.0        | 2           | 1           | 1         | 1          | 1          |
| <i>Crucibulum laeve</i> CBS 166.37 v1.0                     | 1           | 1           | 1         | 1          | 1          |
| <i>Cryptococcus curvatus</i> ATCC 20509 v1.0                | 1           | 1           | 1         | 1          | 1          |
| <i>Cryptococcus neoformans</i> var. <i>neoformans</i> JEC21 | 2           | 1           | 1         | 1          | 1          |
| <i>Cryptococcus neoformans</i> var. <i>grubii</i> H99       | 4           | 2           | 1         | 2          | 2          |
| <i>Cryptococcus terricola</i> JCM 24523 v1.0                | 1           | 1           | 1         | 1          | 1          |
| <i>Cryptococcus vishniacii</i> v1.0                         | 1           | 1           | 1         | 1          | 1          |
| <i>Cryptococcus wieringae</i> v1.0                          | 1           | 1           | 1         | 1          | 1          |
| <i>Cyathus striatus</i> AH 40144 v1.0                       | 2           | 2           | 1         | 1          | 1          |
| <i>Cylindrobasidium torrendii</i> FP15055 v1.0              | 1           | 1           | 1         | 1          | 1          |
| <i>Cystostereum murrayi</i> CysMur001 v1.0                  | 1           | 1           | 1         | 1          | 1          |
| <i>Cyrtidiella melzeri</i> FP 102339 v1.0                   | 2           | 1           | 1         | 1          | 1          |
| <i>Dacryopinax primogenitus</i> DJM 731 SSP1 v1.0           | 1           | 1           | 1         | 1          | 0          |
| <i>Daedalea quercina</i> v1.0                               | 1           | 1           | 1         | 1          | 1          |
| <i>Dendrothele bispora</i> CBS 962.96 v1.0                  | 4           | 1           | 1         | 1          | 1          |
| <i>Dentipellis</i> sp. KUC8613 v1.0                         | 1           | 1           | 1         | 1          | 1          |
| <i>Dichomitus squalens</i> CBS463.89 v1.0                   | 1           | 1           | 1         | 1          | 1          |
| <i>Dichomitus squalens</i> CBS464.89 v1.0                   | 1           | 1           | 1         | 1          | 1          |

| <b>Basidiomycota (307 genomes searched)</b>              | <b>HMGS</b> | <b>HMGR</b> | <b>MK</b> | <b>PMK</b> | <b>MDD</b> |
|----------------------------------------------------------|-------------|-------------|-----------|------------|------------|
| <i>Dichomitus squalens</i> LYAD-421 SS1 v1.0             | 1           | 1           | 1         | 1          | 1          |
| <i>Dichomitus squalens</i> OM18370.1 v1.0                | 1           | 1           | 1         | 1          | 1          |
| <i>Dioszegia cryoxerica</i> v1.0                         | 1           | 1           | 1         | 1          | 1          |
| <i>Erythrobasidium hasegawianum</i> ATCC 9536 v1.0       | 2           | 2           | 1         | 2          | 2          |
| <i>Exidia glandulosa</i> v1.0                            | 1           | 2           | 1         | 2          | 1          |
| <i>Exobasidium vaccinii</i> MPITM v1.0                   | 1           | 1           | 1         | 1          | 1          |
| <i>Fellomyces penicillatus</i> Phaff54-35 v1.0           | 1           | 1           | 1         | 1          | 1          |
| <i>Fibroporia radiculosa</i> TFFH 294                    | 1           | 1           | 1         | 1          | 1          |
| <i>Fibulobasidium inconspicuum</i> Phaff89-39 v1.0       | 1           | 1           | 1         | 1          | 1          |
| <i>Fibulorhizoctonia</i> sp. CBS 109695 v1.0             | 1           | 2           | 1         | 1          | 1          |
| <i>Fistulina hepatica</i> v1.0                           | 1           | 1           | 1         | 1          | 1          |
| <i>Fomes fomentarius</i> CIRM-BRFM 1821 v1.0             | 1           | 1           | 1         | 1          | 1          |
| <i>Fomitiporia mediterranea</i> v1.0                     | 1           | 1           | 1         | 2          | 1          |
| <i>Fomitopsis pinicola</i> FP-58527 SS1 v3.0             | 1           | 1           | 1         | 1          | 1          |
| <i>Galerina marginata</i> v1.0                           | 1           | 1           | 1         | 1          | 1          |
| <i>Ganoderma</i> sp. 10597 SS1 v1.0                      | 1           | 1           | 1         | 1          | 1          |
| <i>Gautieria morchelliformis</i> GMNE.BST v1.0           | 4           | 1           | 1         | 1          | 1          |
| <i>Gloeopeniophorella convolvens</i> OM19405 v1.0        | 1           | 1           | 1         | 1          | 1          |
| <i>Gloeophyllum trabeum</i> v1.0                         | 2           | 1           | 1         | 1          | 1          |
| <i>Guyanagaster necrorhiza</i> MCA 3950 v1.0             | 1           | 1           | 1         | 1          | 1          |
| <i>Gymnopilus chrysopellus</i> PR-1187 v1.0              | 1           | 1           | 1         | 1          | 1          |
| <i>Gymnopilus junonius</i> AH 44721 v1.0                 | 1           | 1           | 1         | 1          | 1          |
| <i>Gymnopus androsaceus</i> JB14 v1.0                    | 2           | 12          | 1         | 2          | 1          |
| <i>Gymnopus earleae</i> GB-263.02 v1.0                   | 1           | 2           | 1         | 1          | 1          |
| <i>Gymnopus luxurians</i> v1.0                           | 1           | 1           | 1         | 2          | 1          |
| <i>Gyrodon lividus</i> BX v1.0                           | 1           | 1           | 1         | 1          | 1          |
| <i>Hebeloma cylindrosporum</i> h7 v2.0                   | 3           | 1           | 1         | 1          | 2          |
| <i>Heliocybe sulcata</i> OMC1185 v1.0                    | 1           | 1           | 1         | 1          | 1          |
| <i>Heterobasidium annosum</i> v2.0                       | 1           | 1           | 1         | 1          | 2          |
| <i>Heterogastridium pycnidioideum</i> ATCC MYA-4631 v1.0 | 1           | 1           | 1         | 1          | 1          |
| <i>Hexagonia nitida</i> CIRM-BRFM 1802 v1.0              | 1           | 1           | 1         | 1          | 1          |
| <i>Hyalopycnis blepharistoma</i> ATCC 48560 v1.0         | 1           | 1           | 1         | 1          | 2          |
| <i>Hydnomerulius pinastris</i> v2.0                      | 1           | 1           | 1         | 1          | 1          |
| <i>Hydnopolyporus fimbriatus</i> CBS384.51 v1.0          | 1           | 1           | 1         | 1          | 1          |
| <i>Hydnum rufescens</i> UP504 v2.0                       | 1           | 1           | 1         | 0          | 1          |
| <i>Hymenopellis radicata</i> IJFM A160 v1.0              | 4           | 2           | 1         | 1          | 3          |
| <i>Hypholoma sublateritium</i> v1.0                      | 1           | 1           | 1         | 1          | 2          |
| <i>Irpex lacteus</i> CCBAS Fr. 238 617/93 v1.0           | 2           | 1           | 1         | 0          | 1          |
| <i>Jaapia argillacea</i> v1.0                            | 1           | 1           | 1         | 1          | 1          |
| <i>Jaminaea</i> sp. MCA 5214 v1.0                        | 1           | 1           | 1         | 1          | 1          |
| <i>Kockovaella imperatae</i> NRRL Y-17943 v1.0           | 0           | 1           | 1         | 1          | 1          |
| <i>Laccaria amethystina</i> LaAM-08-1 v2.0               | 6           | 2           | 1         | 1          | 1          |
| <i>Laccaria bicolor</i> v2.0                             | 3           | 2           | 1         | 1          | 2          |
| <i>Lactarius quietus</i> S23C v1.0                       | 1           | 1           | 1         | 1          | 1          |
| <i>Lactifluus subvellereus</i> BPL653 v1.0               | 1           | 1           | 1         | 1          | 1          |

| <b>Basidiomycota (307 genomes searched)</b>              | <b>HMGS</b> | <b>HMGR</b> | <b>MK</b> | <b>PMK</b> | <b>MDD</b> |
|----------------------------------------------------------|-------------|-------------|-----------|------------|------------|
| <i>Lactifluus volemus</i> BPL652 v1.0                    | 1           | 1           | 1         | 1          | 1          |
| <i>Laetiporus sulphureus</i> var. <i>sulphureus</i> v1.0 | 1           | 1           | 1         | 1          | 1          |
| <i>Leiotrametes lactinea</i> CIRM-BRFM 1664 v1.0         | 1           | 1           | 1         | 1          | 1          |
| <i>Leiotrametes</i> sp BRFM 1775 v1.0                    | 1           | 1           | 1         | 1          | 1          |
| <i>Lentinellus vulpinus</i> AHS73672-sp v1.0             | 2           | 1           | 1         | 1          | 1          |
| <i>Lentinus tigrinus</i> ALCF2SS1-6 v1.0                 | 1           | 2           | 1         | 2          | 1          |
| <i>Lentinus tigrinus</i> ALCF2SS1-7 v1.0                 | 1           | 2           | 1         | 2          | 1          |
| <i>Lentinus tigrinus</i> v1.0                            | 1           | 2           | 1         | 2          | 1          |
| <i>Lepista nuda</i> CBS 247.69 v1.0                      | 2           | 1           | 1         | 1          | 1          |
| <i>Leucoagaricus gongylophorus</i>                       | 1           | 1           | 1         | 1          | 1          |
| <i>Leucogyrophana mollusca</i> KUC20120723A-06 v1.0      | 1           | 1           | 1         | 1          | 1          |
| <i>Leucosporidiella creatinivora</i> 62-1032 v1.0        | 1           | 1           | 1         | 1          | 0          |
| <i>Lycoperdon perlatum</i> FP-102459-T v1.0              | 1           | 1           | 1         | 1          | 1          |
| <i>Macrolepiota fuliginosa</i> MF-IS2 v1.0               | 1           | 1           | 1         | 1          | 1          |
| <i>Malassezia globosa</i>                                | 1           | 1           | 1         | 1          | 1          |
| <i>Malassezia sympodialis</i> ATCC 42132                 | 1           | 1           | 1         | 1          | 1          |
| <i>Marasmius fiardii</i> PR-910 v1.0                     | 2           | 1           | 1         | 1          | 1          |
| <i>Meira miltonrushii</i> MCA 3882 v1.0                  | 1           | 1           | 1         | 1          | 1          |
| <i>Melampsora allii-populina</i> 12AY07 v1.0             | 1           | 1           | 1         | 2          | 1          |
| <i>Melampsora larici-populina</i> v2.0                   | 1           | 2           | 1         | 2          | 1          |
| <i>Melampsora lini</i> CH5                               | 1           | 1           | 1         | 2          | 1          |
| <i>Melanotaenium endogenum</i> CBS481.91 v1.0            | 1           | 1           | 1         | 2          | 1          |
| <i>Meredithblackwellia eburnea</i> MCA 4105 v1.0         | 1           | 1           | 1         | 1          | 1          |
| <i>Microbotryum lychnidis-dioicae</i> p1A1 Lamole        | 1           | 1           | 1         | 1          | 1          |
| <i>Microbotryum violaceum</i> p1A1 Lamole v1.0           | 1           | 1           | 1         | 1          | 1          |
| <i>Microstromatales</i> sp. MCA 4718 v1.0                | 1           | 1           | 1         | 1          | 1          |
| <i>Mixia osmundae</i> IAM 14324 v1.0                     | 1           | 1           | 1         | 1          | 2          |
| <i>Moesziomyces aphidis</i> DSM 70725                    | 1           | 1           | 1         | 1          | 1          |
| <i>Moniliella</i> sp. MCA 3643 v1.0                      | 1           | 2           | 1         | 1          | 1          |
| <i>Moniliophthora perniciososa</i> FA553                 | 1           | 1           | 1         | 1          | 1          |
| <i>Mrakia frigida</i> ATCC 22029 v1.0                    | 1           | 1           | 1         | 1          | 1          |
| <i>Multifurca ochricompacta</i> BPL690 v1.0              | 1           | 1           | 1         | 1          | 1          |
| <i>Mutinus elegans</i> ME.BST v1.0                       | 1           | 1           | 1         | 1          | 1          |
| <i>Mycena capillaripes</i> Frankland 9286 v1.0           | 3           | 1           | 1         | 1          | 1          |
| <i>Mycena galopus</i> ATCC-62051 v1.0                    | 4           | 1           | 1         | 1          | 1          |
| <i>Mycena haematopus</i> CBHHK189 v1.0                   | 3           | 1           | 1         | 1          | 1          |
| <i>Mycena rosella</i> CBHHK067 v1.0                      | 3           | 2           | 1         | 1          | 1          |
| <i>Mycena</i> sp. CBHHK59/15 v1.0                        | 2           | 1           | 1         | 1          | 1          |
| <i>Naiadella fluitans</i> ATCC 64713 v1.0                | 1           | 2           | 1         | 1          | 1          |
| <i>Naohidea sebacea</i> CBS 8477 (P95) v1.0              | 1           | 1           | 1         | 1          | 2          |
| <i>Neolentinus lepideus</i> v1.0                         | 1           | 1           | 1         | 1          | 2          |
| <i>Obba rivulosa</i> 3A-2 v1.0                           | 2           | 1           | 1         | 1          | 1          |
| <i>Omphalotus olearius</i>                               | 1           | 1           | 1         | 1          | 1          |
| <i>Onnia scaura</i> P-53A v1.0                           | 1           | 1           | 1         | 1          | 1          |
| <i>Oudemansiella mucida</i> CBS 558.79 v1.0              | 2           | 1           | 1         | 1          | 2          |

| <b>Basidiomycota (307 genomes searched)</b>                   | <b>HMGS</b> | <b>HMGR</b> | <b>MK</b> | <b>PMK</b> | <b>MDD</b> |
|---------------------------------------------------------------|-------------|-------------|-----------|------------|------------|
| <i>Panaeolus papilionaceus</i> CIRM-BRFM 715 v1.0             | 1           | 1           | 1         | 1          | 1          |
| <i>Panellus stipticus</i> KUC8834 v1.1                        | 2           | 1           | 1         | 1          | 1          |
| <i>Panellus stipticus</i> LUM v1.0                            | 2           | 1           | 1         | 1          | 1          |
| <i>Panus rudis</i> PR-1116 ss-1 v1.0                          | 1           | 4           | 1         | 1          | 1          |
| <i>Paxillus adelphus</i> Ve08.2h10 v2.0                       | 1           | 1           | 1         | 1          | 1          |
| <i>Paxillus ammoniavirescens</i> Pou09.2 v1.0                 | 1           | 1           | 1         | 1          | 2          |
| <i>Paxillus involutus</i> ATCC 200175 v1.0                    | 1           | 1           | 1         | 1          | 1          |
| <i>Peniophora</i> sp. CONTA v1.0                              | 2           | 2           | 1         | 1          | 1          |
| <i>Peniophora</i> sp. v1.0                                    | 3           | 1           | 1         | 1          | 1          |
| <i>Phanerochaete carnosa</i> HHB-10118-Sp v1.0                | 1           | 9           | 1         | 0          | 0          |
| <i>Phanerochaete chrysosporium</i> RP-78 v2.2                 | 1           | 1           | 1         | 1          | 1          |
| <i>Phellinus ferrugineofuscus</i> SpK3Phefer14 v1.0           | 1           | 2           | 1         | 1          | 1          |
| <i>Phlebia brevispora</i> HHB-7030 SS6 v1.0                   | 1           | 1           | 1         | 1          | 1          |
| <i>Phlebia centrifuga</i> FBCC195                             | 1           | 1           | 1         | 1          | 1          |
| <i>Phlebiopsis gigantea</i> v1.0                              | 1           | 1           | 1         | 1          | 0          |
| <i>Pholiota alnicola</i> AH 47727 v1.0                        | 2           | 1           | 1         | 1          | 1          |
| <i>Pholiota conissans</i> CIRM-BRFM 674 v1.0                  | 1           | 2           | 1         | 1          | 1          |
| <i>Piloderma croceum</i> F 1598 v1.0                          | 1           | 1           | 1         | 2          | 6          |
| <i>Piriformospora indica</i> DSM 11827 from MPI               | 1           | 1           | 1         | 1          | 1          |
| <i>Pisolithus microcarpus</i> 441 v1.0                        | 1           | 2           | 1         | 1          | 1          |
| <i>Pisolithus tinctorius</i> Marx 270 v1.0                    | 1           | 2           | 1         | 1          | 1          |
| <i>Pleurotus eryngii</i> ATCC 90797 v1.0                      | 2           | 1           | 1         | 1          | 1          |
| <i>Pleurotus ostreatus</i> PC15 v2.0                          | 2           | 1           | 1         | 1          | 1          |
| <i>Pleurotus ostreatus</i> PC9 v1.0                           | 2           | 1           | 1         | 1          | 1          |
| <i>Plicaturopsis crispa</i> v1.0                              | 1           | 1           | 1         | 3          | 1          |
| <i>Pluteus cervinus</i> NL-1719 v1.0                          | 2           | 1           | 1         | 1          | 1          |
| <i>Polyporus arcularius</i> v1.0                              | 2           | 1           | 1         | 1          | 1          |
| <i>Polyporus brumalis</i> BRFM 1820 v1.0                      | 2           | 1           | 1         | 1          | 1          |
| <i>Porodaedalea chrysoloma</i> FP-135951 v1.0                 | 1           | 2           | 1         | 1          | 1          |
| <i>Porodaedalea niemelaei</i> PN71-100-IP13 v1.0              | 1           | 1           | 1         | 1          | 1          |
| <i>Postia placenta</i> MAD 698-R v1.0                         | 2           | 2           | 1         | 2          | 2          |
| <i>Postia placenta</i> MAD-698-R-SB12 v1.0                    | 1           | 1           | 1         | 1          | 1          |
| <i>Pseudozyma antarctica</i> T-34                             | 1           | 1           | 1         | 1          | 1          |
| <i>Pseudozyma hubeiensis</i> SY62                             | 1           | 1           | 1         | 1          | 1          |
| <i>Pterula gracilis</i> CBS309.79 v1.0                        | 1           | 1           | 1         | 1          | 1          |
| <i>Puccinia coronata avenae</i> 12NC29                        | 2           | 4           | 1         | 1          | 2          |
| <i>Puccinia coronata avenae</i> 12SD80                        | 2           | 4           | 1         | 1          | 2          |
| <i>Puccinia graminis</i> f. sp. <i>tritici</i> v2.0           | 1           | 1           | 1         | 2          | 2          |
| <i>Puccinia striiformis</i> f. sp. <i>tritici</i> 104 E137 A- | 2           | 6           | 1         | 2          | 2          |
| <i>Puccinia striiformis</i> f. sp. <i>tritici</i> PST-130     | 1           | 3           | 1         | 1          | 1          |
| <i>Puccinia striiformis</i> f. sp. <i>tritici</i> PST-78 v1.0 | 1           | 3           | 1         | 1          | 1          |
| <i>Puccinia triticina</i> 1-1 BBBD Race 1                     | 1           | 1           | 1         | 1          | 2          |
| <i>Punctularia strigosozonata</i> v1.0                        | 2           | 1           | 1         | 1          | 1          |
| <i>Pycnoporus cinnabarinus</i> BRFM 137                       | 1           | 1           | 1         | 1          | 1          |
| <i>Pycnoporus cinnabarinus</i> CIRM-BRFM 50 v1.0              | 1           | 1           | 1         | 3          | 1          |

| <b>Basidiomycota (307 genomes searched)</b>                                                 | <b>HMGS</b> | <b>HMGR</b> | <b>MK</b> | <b>PMK</b> | <b>MDD</b> |
|---------------------------------------------------------------------------------------------|-------------|-------------|-----------|------------|------------|
| <i>Pycnoporus coccineus</i> BRFM 310 v1.0                                                   | 1           | 1           | 1         | 2          | 1          |
| <i>Pycnoporus coccineus</i> CIRM1662                                                        | 1           | 1           | 1         | 1          | 1          |
| <i>Pycnoporus puniceus</i> CIRM-BRFM 1868 v1.0                                              | 1           | 1           | 1         | 1          | 1          |
| <i>Pycnoporus sanguineus</i> BRFM 1264 v1.0                                                 | 1           | 1           | 1         | 1          | 1          |
| <i>Ramaria rubella</i> ( <i>R. acris</i> ) UT-36052-T v1.0                                  | 1           | 1           | 1         | 1          | 2          |
| <i>Rhizoctonia solani</i> AG-1 IB                                                           | 2           | 1           | 1         | 1          | 1          |
| <i>Rhizopogon salebrosus</i> TDB-379 v1.0                                                   | 1           | 1           | 1         | 2          | 1          |
| <i>Rhizopogon vesiculosus</i> Smith                                                         | 1           | 1           | 1         | 1          | 1          |
| <i>Rhizopogon vinicolor</i> AM-OR11-026 v1.0                                                | 1           | 1           | 1         | 1          | 1          |
| <i>Rhodocollybia butyracea</i> AH 40177 v1.0                                                | 1           | 1           | 1         | 2          | 1          |
| <i>Rhodosporidium toruloides</i> ATCC26217 v1.0                                             | 1           | 1           | 1         | 1          | 1          |
| <i>Rhodosporidium toruloides</i> IFO0559_1                                                  | 1           | 1           | 1         | 2          | 1          |
| <i>Rhodosporidium toruloides</i> IFO0880 v2.0                                               | 1           | 1           | 1         | 1          | 1          |
| <i>Rhodosporidium toruloides</i> IFO0880 v4.0                                               | 1           | 1           | 1         | 1          | 1          |
| <i>Rhodosporidium toruloides</i> IFO1236_1                                                  | 1           | 1           | 1         | 1          | 1          |
| <i>Rhodosporidium toruloides</i> NP11                                                       | 1           | 1           | 1         | 1          | 1          |
| <i>Rhodotorula glutinis</i> v1.0                                                            | 1           | 1           | 1         | 1          | 1          |
| <i>Rhodotorula graminis</i> strain WP1 v1.1                                                 | 1           | 1           | 1         | 1          | 1          |
| <i>Rhodotorula minuta</i> MCA 4210 v1.0                                                     | 1           | 1           | 1         | 1          | 1          |
| <i>Rhodotorula mucilaginosa</i> ATCC58901 v1.0                                              | 2           | 2           | 1         | 1          | 1          |
| <i>Rhodotorula</i> sp. J31 v1.0                                                             | 1           | 1           | 1         | 1          | 1          |
| <i>Rhodotorula</i> sp. JG-1b                                                                | 1           | 1           | 1         | 1          | 1          |
| <i>Rickenella fibula</i> HBK330-10 v1.0                                                     | 4           | 3           | 1         | 1          | 1          |
| <i>Rickenella mellea</i> v1.0 (SZMC22713)                                                   | 7           | 4           | 1         | 1          | 1          |
| <i>Rigidoporus microporus</i> ED310 v1.0                                                    | 1           | 1           | 1         | 1          | 1          |
| <i>Russula brevipes</i> BPL707 v1.0                                                         | 1           | 1           | 1         | 1          | 1          |
| <i>Russula compacta</i> BPL669 v1.0                                                         | 2           | 1           | 1         | 1          | 1          |
| <i>Russula dissimulans</i> BPL704 v1.0                                                      | 1           | 1           | 1         | 1          | 1          |
| <i>Russula rugulosa</i> BPL654 v1.0                                                         | 1           | 1           | 1         | 1          | 1          |
| <i>Russula vinacea</i> BPL710 v1.0                                                          | 1           | 1           | 1         | 1          | 1          |
| <i>Schizophyllum commune</i> H4-8 v3.0                                                      | 2           | 1           | 1         | 1          | 1          |
| <i>Schizophyllum commune</i> Loenen D v1.0                                                  | 3           | 1           | 1         | 1          | 1          |
| <i>Schizophyllum commune</i> Tattone D v1.0                                                 | 2           | 1           | 1         | 1          | 1          |
| <i>Schizopora paradoxa</i> KUC8140 v1.0                                                     | 1           | 1           | 1         | 1          | 1          |
| <i>Scleroderma citrinum</i> Foug A v1.0                                                     | 1           | 1           | 1         | 1          | 1          |
| <i>Sclerogaster hysterangioides</i> SCL2.BST v1.0                                           | 1           | 2           | 1         | 1          | 1          |
| <i>Scytinostroma</i> sp. KUC9335 v1.0                                                       | 1           | 1           | 1         | 1          | 1          |
| <i>Sebacina vermifera</i> MAFF 305830 v1.0                                                  | 1           | 1           | 1         | 1          | 1          |
| <i>Sebacina vermifera</i> ssp. bescii v1.0                                                  | 1           | 1           | 1         | 1          | 1          |
| <i>Septobasidium</i> sp. PNB30-8B v1.0                                                      | 1           | 2           | 1         | 1          | 1          |
| <i>Serpula himantiioides</i> ( <i>S.lacrymans</i> var <i>shastensis</i> )<br>MUCL38935 v1.0 | 1           | 1           | 1         | 1          | 1          |
| <i>Serpula lacrymans</i> S7.3 v2.0                                                          | 1           | 1           | 1         | 1          | 1          |
| <i>Serpula lacrymans</i> S7.9 v2.0                                                          | 1           | 1           | 1         | 1          | 1          |
| <i>Sirobasidium intermedium</i> CBS7805 v1.0                                                | 1           | 1           | 1         | 1          | 1          |

| <b>Basidiomycota (307 genomes searched)</b>            | <b>HMGS</b> | <b>HMGR</b> | <b>MK</b> | <b>PMK</b> | <b>MDD</b> |
|--------------------------------------------------------|-------------|-------------|-----------|------------|------------|
| <i>Sistotremastrum niveocremeum</i> HHB9708 ss-1 1.0   | 1           | 1           | 1         | 1          | 1          |
| <i>Sistotremastrum suecicum</i> v1.0                   | 1           | 1           | 1         | 1          | 1          |
| <i>Sparassis latifolia</i> CCMJ1100 v1.0               | 1           | 1           | 1         | 1          | 1          |
| <i>Sphaerobolus stellatus</i> v1.0                     | 2           | 1           | 1         | 1          | 1          |
| <i>Sporidiobolus pararoseus</i> Phaff 68-350 v1.0      | 1           | 1           | 1         | 1          | 1          |
| <i>Sporisorium reilianum</i> SRZ2                      | 1           | 1           | 1         | 1          | 1          |
| <i>Sporobolomyces linderiae</i> CBS 7893 v1.0          | 1           | 1           | 1         | 1          | 1          |
| <i>Sporobolomyces roseus</i> v1.0                      | 1           | 1           | 1         | 1          | 1          |
| <i>Stereum hirsutum</i> FP-91666 SS1 v1.0              | 4           | 1           | 1         | 1          | 1          |
| <i>Suillus americanus</i> EM31 v1.0                    | 1           | 1           | 1         | 1          | 1          |
| <i>Suillus brevipes</i> Sb2 v2.0                       | 1           | 1           | 1         | 1          | 1          |
| <i>Suillus decipiens</i> EM49 v1.0                     | 1           | 1           | 1         | 1          | 1          |
| <i>Suillus granulatus</i> EM37 v1.0                    | 1           | 2           | 1         | 1          | 1          |
| <i>Suillus hirtellus</i> EM16 v1.0                     | 1           | 1           | 1         | 1          | 1          |
| <i>Suillus luteus</i> UH-Slu-Lm8-n1 v3.0               | 1           | 1           | 1         | 1          | 1          |
| <i>Suillus pictus</i> EM44 v1.0                        | 1           | 1           | 1         | 1          | 1          |
| <i>Suillus subaureus</i> MN1 v1.0                      | 1           | 1           | 1         | 1          | 1          |
| <i>Suillus tomentosus</i> FC115 v1.0                   | 1           | 1           | 1         | 1          | 1          |
| <i>Testicularia cyperi</i> MCA 3645 v1.0               | 1           | 1           | 1         | 1          | 1          |
| <i>Thanatephorus cucumeris</i> PT424 v1.0              | 2           | 1           | 1         | 1          | 1          |
| <i>Thelephora ganbajun</i> P2 v1.0                     | 1           | 1           | 1         | 1          | 1          |
| <i>Tilletiaria anomala</i> UBC 951 v1.0                | 1           | 1           | 1         | 1          | 1          |
| <i>Tilletiopsis albescens</i> v1.0                     | 1           | 1           | 1         | 1          | 1          |
| <i>Tilletiopsis</i> sp. TKC30 v1.0                     | 1           | 1           | 1         | 1          | 1          |
| <i>Tilletiopsis washingtonensis</i> MCA 4186 v1.0      | 1           | 1           | 1         | 1          | 1          |
| <i>Trametes cingulata</i> BRFM 1805 v1.0               | 1           | 1           | 1         | 1          | 1          |
| <i>Trametes gibbosa</i> CIRM-BRFM 1770 v1.0            | 1           | 1           | 1         | 1          | 1          |
| <i>Trametes ljubarskyi</i> CIRM1659 v1.0               | 1           | 1           | 1         | 1          | 1          |
| <i>Trametes maxima</i> CIRM-BRFM 1813 v1.0             | 1           | 1           | 1         | 1          | 1          |
| <i>Trametes meyenii</i> CIRM-BRFM 1810 v1.0            | 1           | 1           | 1         | 1          | 1          |
| <i>Trametes pubescens</i> FBCC735                      | 1           | 1           | 1         | 1          | 1          |
| <i>Trametes versicolor</i> v1.0                        | 1           | 1           | 1         | 1          | 1          |
| <i>Trametopsis cervina</i> CIRM-BRFM 1824 v1.0         | 1           | 1           | 1         | 1          | 1          |
| <i>Tremella encephala</i> 68-887.2 v1.0                | 1           | 1           | 1         | 1          | 1          |
| <i>Tremella mesenterica</i> Fries v1.0                 | 1           | 1           | 1         | 1          | 1          |
| <i>Trichaptum abietinum</i> v1.0                       | 2           | 1           | 1         | 1          | 1          |
| <i>Tricholoma matsutake</i> 945 v3.0                   | 1           | 1           | 1         | 1          | 1          |
| <i>Trichosporon asahii</i> var. <i>asahii</i> CBS 2479 | 1           | 1           | 1         | 1          | 1          |
| <i>Trichosporon asahii</i> var. <i>asahii</i> CBS 8904 | 1           | 1           | 1         | 1          | 1          |
| <i>Trichosporon chiarellii</i> MYA-4694 v1.0           | 1           | 1           | 1         | 1          | 1          |
| <i>Trichosporon guehoae</i> v1.0                       | 1           | 1           | 1         | 1          | 1          |
| <i>Trichosporon oleaginosus</i> IBC0246 v1.0           | 1           | 1           | 1         | 1          | 1          |
| <i>Tritirachium</i> sp. CBS 265.96 v1.0                | 2           | 1           | 1         | 1          | 1          |
| <i>Tulasnella calospora</i> AL13/4D v1.0               | 2           | 2           | 1         | 1          | 1          |
| <i>Tulasnella calospora</i> UAMH 9824 v1.0             | 1           | 2           | 1         | 1          | 1          |

| <b>Basidiomycota (307 genomes searched)</b>      | <b>HMGS</b> | <b>HMGR</b> | <b>MK</b> | <b>PMK</b> | <b>MDD</b> |
|--------------------------------------------------|-------------|-------------|-----------|------------|------------|
| <i>Ustilago hordei</i> Uh4857_4                  | 0           | 0           | 1         | 1          | 0          |
| <i>Ustilago maydis</i> 521 v2.0                  | 1           | 1           | 1         | 1          | 1          |
| <i>Vararia minispora</i> EC-137 v1.0             | 1           | 2           | 1         | 1          | 1          |
| <i>Violaceomyces palustris</i> SA 807 v1.0       | 1           | 1           | 1         | 1          | 1          |
| <i>Volvariella volvacea</i> V23                  | 1           | 1           | 1         | 1          | 1          |
| <i>Vuilleminia comedens</i> VcCUCC2015_SSI3 v1.0 | 2           | 1           | 1         | 1          | 1          |
| <i>Vuilleminia comedens</i> VcCUCC2015_SSI6 v1.0 | 3           | 1           | 1         | 1          | 1          |
| <i>Wallemia ichthyophaga</i> EXF-994             | 1           | 1           | 1         | 1          | 1          |
| <i>Wallemia sebi</i> v1.0                        | 1           | 1           | 1         | 1          | 1          |
| <i>Wolfiporia cocos</i> MD-104 SS10 v1.0         | 1           | 1           | 1         | 1          | 1          |
| <i>Xenasmattella vaga</i> CBS212.54 v1.0         | 1           | 1           | 1         | 1          | 1          |
| <i>Xerocomus badius</i> 84.06 v1.0               | 1           | 1           | 0         | 1          | 1          |

**Table S5**

**Survey Ascomycota genomes in JGI's Fungal Genome Database (performed 10-2017) for duplication of mevalonate biosynthetic genes.** BLAST searches (parameters: Blossom62 Scoring Matrix, 1.0 E-5, Model Proteins) were performed with HMGS, HMGR, MK, PMK and MDD sequences from *S. cerevisiae* (see Supporting Data Set for sequences). See Figure 1 for mevalonate pathway. Bold numbers denote multiple HMGS or HMGR gene copies. *Note: Individual hits were not manually verified. Some duplications may represent pseudogenes and/or allelic variants that may have been included into the filtered model protein list for certain genomes.*

| <b>Ascomycota (510 genomes searched)</b>             | <b>HMGS</b> | <b>HMGR</b> | <b>MK</b> | <b>PMK</b> | <b>MDD</b> |
|------------------------------------------------------|-------------|-------------|-----------|------------|------------|
| <b>Number of genomes with:</b>                       |             |             |           |            |            |
| >1 homolog                                           | 137         | 150         | 50        | 6          | 6          |
| 2                                                    | 121         | 92          | 48        | 5          | 5          |
| 3                                                    | 14          | 21          | 1         | 1          | 1          |
| 4                                                    | 2           | 31          | 1         | 0          | 0          |
| ≥5 homologs                                          | 0           | 6           | 0         | 0          | 0          |
| multiple copies of HMGS and/or HMGR: 197             |             |             |           |            |            |
| multiple copies of HMGS and HMGR: 81                 |             |             |           |            |            |
| <b>Genome</b>                                        |             |             |           |            |            |
| <i>Aaosphaeria arxii</i> CBS 175.79 v1.0             | 1           | 1           | 1         | 1          | 1          |
| <i>Acephala macrosclerotiorum</i> EW76-UTF0540 v1.0  | 1           | 1           | 1         | 1          | 1          |
| <i>Acidomyces richmondensis</i> BFW                  | 1           | 1           | 1         | 1          | 1          |
| <i>Acidomyces richmondensis</i> BFW                  | 1           | 1           | 1         | 1          | 1          |
| <i>Acidothrix acidophila</i> CBS 136259 v1.0         | <b>2</b>    | 1           | 1         | 1          | 1          |
| <i>Acremonium alcalophilum</i> v2.0                  | 1           | 1           | 1         | 1          | 1          |
| <i>Acremonium chrysogenum</i> ATCC 11550             | 1           | 1           | 1         | 1          | 1          |
| <i>Acremonium strictum</i> DS1bioAY4a v1.0           | 1           | 1           | 1         | 1          | 1          |
| <i>Aliquandostipite khaoyaiensis</i> CBS 118232 v1.0 | 1           | <b>2</b>    | 1         | 1          | 1          |
| <i>Alternaria alternata</i> 133aPRJ v1.0             | 1           | 1           | 1         | 1          | 1          |
| <i>Alternaria alternata</i> SRC1lrK2f v1.0           | 1           | 1           | 1         | 1          | 1          |
| <i>Alternaria brassicicola</i>                       | 1           | 1           | 1         | 1          | 1          |
| <i>Amniculicola lignicola</i> CBS 123094 v1.0        | 1           | 1           | 1         | 1          | 1          |
| <i>Amorphotheca resiniae</i> v1.0                    | 1           | 1           | 1         | 1          | 1          |
| <i>Ampelomyces quisqualis</i> HMLAC05119 v1.0        | 1           | 1           | 1         | 1          | 1          |
| <i>Anthostoma avocetta</i> NRRL 3190 v1.0            | 1           | 1           | 1         | 1          | 1          |
| <i>Apiosordaria backusii</i> CBS 540.89 v1.0         | 1           | <b>2</b>    | 1         | 1          | 1          |
| <i>Apiospora montagnei</i> NRRL 25634 v1.0           | 1           | 1           | 1         | 1          | 1          |
| <i>Aplosporella prunicola</i> CBS 121.167 v1.0       | <b>2</b>    | 1           | 1         | 1          | 1          |
| <i>Arthroascus fermentans</i> 17710 v1.0             | 1           | 1           | 1         | 1          | 1          |
| <i>Arthrobotrys oligospora</i> ATCC 24927            | 1           | 1           | 1         | 1          | 1          |
| <i>Arthroderma benhamiae</i> CBS 112371              | <b>2</b>    | 1           | 1         | 1          | 1          |
| <i>Ascobolus immersus</i> RN42 v1.0                  | 1           | 1           | 1         | 1          | 1          |
| <i>Ascochyta rabiei</i> ArDII                        | 1           | <b>2</b>    | 1         | 1          | 1          |
| <i>Ascocoryne sarcoides</i> NRRL50072                | 1           | <b>2</b>    | 1         | 1          | 1          |
| <i>Ascodesmis nigricans</i> CBS 389.68 v1.0          | 1           | 1           | 1         | 1          | 1          |



| <b>Ascomycota (510 genomes searched)</b>                  | <b>HMGS</b> | <b>HMGR</b> | <b>MK</b> | <b>PMK</b> | <b>MDD</b> |
|-----------------------------------------------------------|-------------|-------------|-----------|------------|------------|
| <i>Ascoidea rubescens</i> NRRL Y17699 v1.0                | 1           | 1           | 2         | 1          | 1          |
| <i>Aspergillus aculeatinus</i> CBS 121060 v1.0            | 2           | 4           | 2         | 1          | 1          |
| <i>Aspergillus aculeatus</i> ATCC16872 v1.1               | 2           | 3           | 1         | 1          | 1          |
| <i>Aspergillus bombycis</i> NRRL 26010                    | 2           | 3           | 1         | 1          | 1          |
| <i>Aspergillus brasiliensis</i> v1.0                      | 2           | 4           | 1         | 1          | 1          |
| <i>Aspergillus brunneoviolaceus</i> CBS 621.78 v1.0       | 2           | 3           | 1         | 1          | 1          |
| <i>Aspergillus calidoustus</i>                            | 1           | 2           | 1         | 1          | 1          |
| <i>Aspergillus campestris</i> IBT 28561 v1.0              | 1           | 1           | 1         | 1          | 1          |
| <i>Aspergillus carbonarius</i> ITEM 5010 v3               | 2           | 5           | 1         | 1          | 1          |
| <i>Aspergillus clavatus</i> NRRL 1 from AspGD             | 2           | 1           | 1         | 1          | 1          |
| <i>Aspergillus costaricensis</i> CBS 115574 v1.0          | 2           | 4           | 1         | 1          | 1          |
| <i>Aspergillus cristatus</i> GZAAS20.1005                 | 1           | 1           | 2         | 1          | 1          |
| <i>Aspergillus ellipticus</i> CBS 707.79 v1.0             | 3           | 4           | 2         | 1          | 1          |
| <i>Aspergillus eucalypticola</i> CBS 122712 v1.0          | 2           | 3           | 1         | 1          | 1          |
| <i>Aspergillus fijiensis</i> CBS 313.89 v1.0              | 2           | 4           | 2         | 1          | 1          |
| <i>Aspergillus flavus</i> NRRL3357                        | 2           | 5           | 1         | 1          | 1          |
| <i>Aspergillus fumigatus</i> A1163                        | 2           | 2           | 1         | 1          | 1          |
| <i>Aspergillus fumigatus</i> Af293 from AspGD             | 2           | 2           | 1         | 1          | 1          |
| <i>Aspergillus glaucus</i> v1.0                           | 2           | 2           | 2         | 1          | 1          |
| <i>Aspergillus heteromorphus</i> CBS 117.55 v1.0          | 4           | 4           | 2         | 1          | 1          |
| <i>Aspergillus homomorphus</i> CBS 101889 v1.0            | 2           | 4           | 1         | 1          | 1          |
| <i>Aspergillus ibericus</i> CBS 121593 v1.0               | 2           | 4           | 1         | 1          | 1          |
| <i>Aspergillus indologenus</i> CBS 114.80 v1.0            | 3           | 4           | 2         | 1          | 1          |
| <i>Aspergillus japonicus</i> CBS 114.51 v1.0              | 3           | 4           | 1         | 1          | 1          |
| <i>Aspergillus kawachii</i> IFO 4308                      | 2           | 4           | 1         | 1          | 1          |
| <i>Aspergillus lacticoffeatus</i> CBS 101883 v1.0         | 2           | 4           | 1         | 1          | 1          |
| <i>Aspergillus luchuensis</i> CBS 106.47 v1.0             | 2           | 4           | 1         | 1          | 1          |
| <i>Aspergillus neoniger</i> CBS 115656 v1.0               | 2           | 4           | 1         | 1          | 1          |
| <i>Aspergillus nidulans</i>                               | 1           | 2           | 1         | 1          | 1          |
| <i>Aspergillus niger</i> ATCC 1015 v4.0                   | 2           | 4           | 1         | 1          | 1          |
| <i>Aspergillus niger</i> CBS 513.88                       | 2           | 4           | 1         | 1          | 1          |
| <i>Aspergillus niger</i> NRRL3                            | 2           | 4           | 1         | 1          | 1          |
| <i>Aspergillus niger</i> van Tieghem ATCC 13496 v1.0      | 2           | 4           | 1         | 1          | 1          |
| <i>Aspergillus nomius</i> NRRL 13137                      | 2           | 3           | 2         | 1          | 1          |
| <i>Aspergillus novofumigatus</i> IBT 16806 v1.0           | 2           | 2           | 1         | 1          | 1          |
| <i>Aspergillus ochraceoroseus</i> IBT 24754 v1.0          | 2           | 1           | 1         | 1          | 1          |
| <i>Aspergillus ochraceoroseus</i> SRRC1432                | 2           | 1           | 1         | 1          | 1          |
| <i>Aspergillus oryzae</i> RIB40                           | 2           | 5           | 1         | 1          | 1          |
| <i>Aspergillus phoenicis</i> (Corda) Thom ATCC 13157 v1.0 | 2           | 4           | 1         | 1          | 1          |
| <i>Aspergillus piperis</i> CBS 112811 v1.0                | 2           | 4           | 1         | 1          | 1          |
| <i>Aspergillus rambellii</i> SRRC1468                     | 2           | 2           | 1         | 1          | 1          |
| <i>Aspergillus saccharolyticus</i> JOP 1030-1 v1.0        | 2           | 2           | 1         | 1          | 1          |
| <i>Aspergillus sclerotiiicarbonarius</i> CBS 121057 v1.0  | 2           | 3           | 1         | 1          | 1          |
| <i>Aspergillus sclerotioniger</i> CBS115572 v1.0          | 2           | 4           | 1         | 1          | 1          |
| <i>Aspergillus steynii</i> IBT 23096 v1.0                 | 2           | 2           | 1         | 1          | 1          |

| <b>Ascomycota (510 genomes searched)</b>                          | <b>HMGS</b> | <b>HMGR</b> | <b>MK</b> | <b>PMK</b> | <b>MDD</b> |
|-------------------------------------------------------------------|-------------|-------------|-----------|------------|------------|
| <i>Aspergillus sydowii</i> CBS 593.65 v1.0                        | 1           | 2           | 1         | 1          | 1          |
| <i>Aspergillus terreus</i> NIH 2624                               | 1           | 4           | 1         | 1          | 1          |
| <i>Aspergillus tubingensis</i> v1.0                               | 2           | 4           | 1         | 1          | 1          |
| <i>Aspergillus udagawae</i> IFM 46973                             | 2           | 2           | 1         | 1          | 1          |
| <i>Aspergillus uvarum</i> CBS 121591 v1.0                         | 3           | 4           | 1         | 1          | 1          |
| <i>Aspergillus vadensis</i> CBS 113365 v1.0                       | 2           | 4           | 1         | 1          | 1          |
| <i>Aspergillus versicolor</i> v1.0                                | 1           | 2           | 1         | 1          | 1          |
| <i>Aspergillus violaceofuscus</i> CBS 115571 v1.0                 | 3           | 4           | 1         | 1          | 1          |
| <i>Aspergillus wentii</i> v1.0                                    | 2           | 3           | 2         | 1          | 1          |
| <i>Aspergillus zonatus</i> v1.0                                   | 2           | 2           | 1         | 1          | 1          |
| <i>Aulographum hederæ</i> v2.0                                    | 1           | 1           | 1         | 1          | 1          |
| <i>Aureobasidium pullulans</i> var. <i>melanogenum</i> CBS 110374 | 1           | 1           | 1         | 1          | 1          |
| <i>Aureobasidium pullulans</i> var. <i>namibiae</i> CBS 147.97    | 2           | 2           | 1         | 1          | 1          |
| <i>Aureobasidium pullulans</i> var. <i>pullulans</i> EXF-150      | 1           | 2           | 1         | 1          | 1          |
| <i>Aureobasidium pullulans</i> var. <i>subglaciale</i> EXF-2481   | 2           | 2           | 1         | 1          | 1          |
| <i>Babjeviella inositovora</i> NRRL Y-12698 v1.0                  | 1           | 1           | 1         | 1          | 1          |
| <i>Baudoinia compniacensis</i> UAMH 10762 (4089826) v1.0          | 1           | 1           | 1         | 1          | 1          |
| <i>Beauveria bassiana</i> ARSEF 2860                              | 1           | 1           | 1         | 1          | 1          |
| <i>Bimuria novae-zelandiae</i> CBS 107.79 v1.0                    | 1           | 1           | 1         | 1          | 1          |
| <i>Biscogniauxia nummularia</i> v1.0                              | 1           | 1           | 1         | 1          | 1          |
| <i>Bisporella</i> sp. PMI_857 v1.0                                | 1           | 2           | 1         | 1          | 1          |
| <i>Blastobotrys (Arxula) adenivorans</i>                          | 1           | 1           | 1         | 1          | 1          |
| <i>Blastomyces dermatitidis</i> SLH14081                          | 2           | 1           | 1         | 2          | 2          |
| <i>Blumeria graminis</i> f. sp. <i>tritici</i> 96224              | 1           | 1           | 1         | 1          | 1          |
| <i>Blumeria graminis</i> f.sp. <i>hordei</i> DH14                 | 1           | 1           | 1         | 1          | 1          |
| <i>Bombardia bombardia</i> SMH3391-2 v1.0                         | 2           | 1           | 3         | 1          | 1          |
| <i>Botryosphaeria dothidea</i>                                    | 2           | 2           | 2         | 1          | 1          |
| <i>Botrytis cinerea</i> v1.0                                      | 2           | 1           | 1         | 1          | 1          |
| <i>Bulgaria inquinans</i> CBS118.31 v1.0                          | 1           | 1           | 1         | 3          | 3          |
| <i>Byssochlamys spectabilis</i> No. 5                             | 1           | 2           | 1         | 1          | 1          |
| <i>Byssothecium circinans</i> CBS 675.92 v1.0                     | 2           | 2           | 2         | 1          | 1          |
| <i>Cadophora</i> sp. DSE1049 v1.0                                 | 1           | 2           | 1         | 1          | 1          |
| <i>Caliciopsis orientalis</i>                                     | 1           | 1           | 1         | 1          | 1          |
| <i>Caloscypha fulgens</i> ATCC 42695 v1.0                         | 1           | 1           | 1         | 1          | 1          |
| <i>Calosphaeria pulchella</i>                                     | 0           | 1           | 1         | 1          | 1          |
| <i>Candida albicans</i> SC5314                                    | 1           | 1           | 1         | 1          | 1          |
| <i>Candida arabinofermentans</i> NRRL YB-2248 v1.0                | 1           | 1           | 1         | 1          | 1          |
| <i>Candida tanzawaensis</i> NRRL Y-17324 v1.0                     | 1           | 1           | 1         | 1          | 1          |
| <i>Candida tenuis</i> NRRL Y-1498 v1.0                            | 1           | 1           | 1         | 1          | 1          |
| <i>Capronia coronata</i> CBS 617.96                               | 1           | 1           | 1         | 1          | 1          |
| <i>Capronia epimyces</i> CBS 606.96                               | 1           | 1           | 1         | 1          | 1          |
| <i>Capronia semiimmersa</i> CBS27337                              | 1           | 1           | 1         | 1          | 1          |
| <i>Cenococcum geophilum</i> 1.58 v2.0                             | 1           | 1           | 1         | 1          | 1          |
| <i>Cephaloascus albidus</i> ATCC 66658 v1.0                       | 1           | 1           | 1         | 1          | 1          |
| <i>Cephaloascus fragrans</i> 12-1022 v1.0                         | 1           | 1           | 1         | 1          | 1          |

| <b>Ascomycota (510 genomes searched)</b>         | <b>HMGS</b> | <b>HMGR</b> | <b>MK</b> | <b>PMK</b> | <b>MDD</b> |
|--------------------------------------------------|-------------|-------------|-----------|------------|------------|
| <i>Cercophora caudata</i> CBS 606.72 v1.0        | 1           | 1           | 1         | 1          | 1          |
| <i>Cercophora newfieldiana</i> SMH2532-1 v1.0    | 1           | 1           | 1         | 1          | 1          |
| <i>Cercospora zeaе-maydis</i> v1.0               | 1           | 2           | 1         | 1          | 1          |
| <i>Chaetomium globosum</i> v1.0                  | 1           | 1           | 1         | 1          | 1          |
| <i>Chaetosphaeria innumera</i>                   | 1           | 1           | 1         | 1          | 1          |
| <i>Chalara longipes</i> BDJ v1.0                 | 1           | 1           | 2         | 1          | 1          |
| <i>Choiromyces venosus</i> 120613-1 v1.0         | 1           | 1           | 1         | 1          | 1          |
| <i>Cladonia grayi</i> Cgr/DA2myc/ss v2.0         | 1           | 1           | 1         | 1          | 1          |
| <i>Cladophialophora bantiana</i> CBS 173.52      | 1           | 1           | 1         | 1          | 1          |
| <i>Cladophialophora carrionii</i> CBS 160.54     | 1           | 1           | 1         | 1          | 1          |
| <i>Cladophialophora immunda</i> CBS83496         | 1           | 1           | 1         | 1          | 1          |
| <i>Cladophialophora psammophila</i> CBS 110553   | 1           | 1           | 1         | 1          | 1          |
| <i>Cladophialophora yegresii</i> CBS 114405      | 1           | 1           | 1         | 1          | 1          |
| <i>Cladorrhinum bulbiliosum</i> DJ3 v1.0         | 1           | 1           | 1         | 1          | 1          |
| <i>Cladosporium fulvum</i> v1.0                  | 1           | 1           | 1         | 1          | 1          |
| <i>Cladosporium sphaerospermum</i> UM 843        | 1           | 1           | 1         | 1          | 1          |
| <i>Clathrospora elynae</i> CBS 161.51 v1.0       | 1           | 1           | 1         | 1          | 1          |
| <i>Clavispora lusitaniae</i> ATCC 42720          | 1           | 1           | 1         | 1          | 1          |
| <i>Clohesyomyces aquaticus</i> v1.0              | 1           | 2           | 1         | 1          | 1          |
| <i>Clonostachys rosea</i> CBS125111 v1.0         | 1           | 3           | 2         | 1          | 1          |
| <i>Coccidioides immitis</i> RS                   | 1           | 1           | 1         | 1          | 1          |
| <i>Coccoldinium bartschii</i> CBS 121709 v1.0    | 1           | 1           | 1         | 1          | 1          |
| <i>Coccomyces strobi</i> CBS 202.91 v1.0         | 1           | 1           | 1         | 1          | 1          |
| <i>Cochliobolus carbonum</i> 26-R-13 v1.0        | 1           | 1           | 1         | 1          | 1          |
| <i>Cochliobolus heterostrophus</i> C4 v1.0       | 1           | 1           | 1         | 1          | 1          |
| <i>Cochliobolus heterostrophus</i> C5 v2.0       | 1           | 1           | 1         | 1          | 1          |
| <i>Cochliobolus lunatus</i> m118 v2.0            | 2           | 1           | 1         | 1          | 1          |
| <i>Cochliobolus miyabeanus</i> ATCC 44560 v1.0   | 1           | 1           | 1         | 1          | 1          |
| <i>Cochliobolus sativus</i> ND90Pr v1.0          | 1           | 1           | 1         | 1          | 1          |
| <i>Cochliobolus victoriae</i> FI3 v1.0           | 1           | 1           | 1         | 1          | 1          |
| <i>Colletotrichum acutatum</i> CBS 112980 v2.0   | 2           | 1           | 1         | 1          | 1          |
| <i>Colletotrichum caudatum</i> CBS131602 v1.0    | 1           | 1           | 2         | 1          | 1          |
| <i>Colletotrichum cereale</i> CBS 129662 v1.0    | 1           | 2           | 1         | 1          | 1          |
| <i>Colletotrichum eremochloae</i> CBS129661 v1.0 | 2           | 2           | 1         | 1          | 1          |
| <i>Colletotrichum falcatum</i> MAFF306170 v1.0   | 1           | 1           | 1         | 1          | 1          |
| <i>Colletotrichum fioriniae</i> PJ7              | 2           | 1           | 1         | 1          | 1          |
| <i>Colletotrichum godetiae</i> CBS 193.32 v1.0   | 2           | 2           | 1         | 1          | 1          |
| <i>Colletotrichum graminicola</i> M1.001         | 2           | 1           | 2         | 1          | 1          |
| <i>Colletotrichum higginsianum</i> IMI 349063    | 2           | 3           | 1         | 1          | 1          |
| <i>Colletotrichum lupini</i> CBS 109225 v1.0     | 2           | 1           | 1         | 1          | 1          |
| <i>Colletotrichum navitas</i> CBS125086 v1.0     | 1           | 1           | 2         | 1          | 1          |
| <i>Colletotrichum nymphaeae</i> SA-01            | 2           | 1           | 1         | 1          | 1          |
| <i>Colletotrichum orchidophilum</i> IMI 309357   | 2           | 3           | 1         | 1          | 1          |
| <i>Colletotrichum phormii</i> CBS102054 v1.0     | 2           | 1           | 2         | 1          | 1          |
| <i>Colletotrichum salicis</i> CBS607.94          | 2           | 1           | 1         | 1          | 1          |

| <b>Ascomycota (510 genomes searched)</b>            | <b>HMGS</b> | <b>HMGR</b> | <b>MK</b> | <b>PMK</b> | <b>MDD</b> |
|-----------------------------------------------------|-------------|-------------|-----------|------------|------------|
| <i>Colletotrichum simmondsii</i> CBS122122          | 2           | 1           | 1         | 1          | 1          |
| <i>Colletotrichum somersetensis</i> CBS 131599 v1.0 | 1           | 2           | 1         | 1          | 1          |
| <i>Colletotrichum sublineola</i> CBS 131301 v1.0    | 2           | 3           | 2         | 1          | 1          |
| <i>Colletotrichum tofieldiae</i> 0861               | 1           | 2           | 1         | 1          | 1          |
| <i>Colletotrichum zoysiae</i> MAFF235873 v1.0       | 1           | 2           | 1         | 1          | 1          |
| <i>Coniella lustricola</i> B22-T-1 v1.0             | 1           | 1           | 1         | 1          | 1          |
| <i>Coniochaeta ligniaria</i> CBS 111746             | 3           | 1           | 1         | 1          | 1          |
| <i>Coniochaeta ligniaria</i> NRRL 30616 v1.0        | 3           | 1           | 1         | 1          | 1          |
| <i>Coniochaeta</i> sp. PMI_546 v1.0                 | 1           | 1           | 1         | 1          | 1          |
| <i>Coniosporium apollinis</i> CBS 100218            | 1           | 1           | 1         | 1          | 1          |
| <i>Cordyceps militaris</i> CM01                     | 1           | 1           | 1         | 1          | 1          |
| <i>Corollospora maritima</i> CBS 119819 v2.0        | 2           | 1           | 1         | 1          | 1          |
| <i>Corynespora cassiicola</i> CCP v1.0              | 2           | 4           | 2         | 1          | 1          |
| <i>Cryphonectria parasitica</i> EP155 v2.0          | 2           | 1           | 1         | 1          | 1          |
| <i>Cryptodiaporthe populea</i> CFL2025 v1.0         | 1           | 1           | 1         | 1          | 1          |
| <i>Cucurbitaria berberidis</i> CBS 394.84 v1.0      | 1           | 1           | 1         | 1          | 1          |
| <i>Cyberlindnera jadinii</i> NRRL Y-1542 v1.0       | 1           | 1           | 1         | 1          | 1          |
| <i>Cyphellophora europaea</i> CBS 101466            | 1           | 1           | 1         | 1          | 1          |
| <i>Daldinia eschscholzii</i> EC12 v1.0              | 1           | 1           | 1         | 1          | 1          |
| <i>Debaryomyces hansenii</i>                        | 1           | 1           | 1         | 1          | 1          |
| <i>Decorospora gaudefroyi</i> v1.0                  | 1           | 1           | 1         | 1          | 1          |
| <i>Dekkera bruxellensis</i> CBS 2499 v2.0           | 1           | 1           | 1         | 1          | 1          |
| <i>Delitschia confertaspora</i> ATCC 74209 v1.0     | 1           | 1           | 1         | 1          | 1          |
| <i>Delphinella strobiligena</i> CBS 735.71 v1.0     | 1           | 2           | 1         | 1          | 1          |
| <i>Diaporthe ampelina</i> UCDDA912                  | 2           | 1           | 1         | 1          | 1          |
| <i>Didymella exigua</i> CBS 183.55 v1.0             | 1           | 1           | 1         | 1          | 1          |
| <i>Didymella zea-maydis</i> 3018                    | 1           | 2           | 1         | 1          | 1          |
| <i>Didymocrea sadasivanii</i> CBS 438.65 v1.0       | 1           | 1           | 1         | 1          | 1          |
| <i>Diplodia seriata</i> DS831                       | 2           | 1           | 1         | 1          | 1          |
| <i>Dissoconium aciculare</i> v1.0                   | 1           | 1           | 1         | 1          | 1          |
| <i>Dothidotthia symphoricarpi</i> v1.0              | 2           | 1           | 1         | 1          | 1          |
| <i>Dothistroma septosporum</i> NZE10 v1.0           | 1           | 1           | 1         | 1          | 1          |
| <i>Elsinoe ampelina</i> CECT 20119 v1.0             | 1           | 2           | 1         | 1          | 1          |
| <i>Endocarpon pusillum</i> Z07020                   | 2           | 1           | 1         | 1          | 1          |
| <i>Entoleuca mammata</i> CFL468 v1.0                | 1           | 1           | 1         | 1          | 1          |
| <i>Eremomyces bilateralis</i> CBS 781.70 v1.0       | 1           | 1           | 1         | 1          | 1          |
| <i>Eremothecium gossypii</i> ATCC 10895             | 1           | 1           | 1         | 1          | 1          |
| <i>Erysiphe necator</i> c                           | 1           | 1           | 1         | 1          | 1          |
| <i>Eurotium rubrum</i> v1.0                         | 1           | 1           | 1         | 1          | 1          |
| <i>Eutypa lata</i> UCREL1                           | 1           | 1           | 1         | 1          | 1          |
| <i>Exophiala alcalophila</i> ATCC 48519 v1.0        | 1           | 1           | 1         | 1          | 1          |
| <i>Exophiala alcalophila</i> J33 v1.0               | 1           | 1           | 1         | 1          | 1          |
| <i>Exophiala aquamarina</i> CBS 119918              | 1           | 1           | 1         | 1          | 1          |
| <i>Exophiala dermatitidis</i> UT8656                | 1           | 1           | 1         | 1          | 1          |
| <i>Exophiala mesophila</i> CBS40295                 | 1           | 2           | 1         | 1          | 1          |

| <b>Ascomycota (510 genomes searched)</b>                                     | <b>HMGS</b> | <b>HMGR</b> | <b>MK</b> | <b>PMK</b> | <b>MDD</b> |
|------------------------------------------------------------------------------|-------------|-------------|-----------|------------|------------|
| <i>Exophiala oligosperma</i> CBS72588                                        | 1           | 1           | 1         | 1          | 1          |
| <i>Exophiala sideris</i> CBS121828                                           | 1           | 2           | 1         | 1          | 1          |
| <i>Exophiala spinifera</i> CBS89968                                          | 1           | 1           | 1         | 1          | 1          |
| <i>Exophiala xenobiotica</i> CBS118157                                       | 1           | 1           | 1         | 1          | 1          |
| <i>Fonsecaea monophora</i> CBS 269.37                                        | 1           | 1           | 1         | 1          | 1          |
| <i>Fonsecaea multimorphosa</i> CBS 102226                                    | 1           | 1           | 1         | 1          | 1          |
| <i>Fonsecaea nubica</i> CBS 269.64                                           | 1           | 2           | 1         | 1          | 1          |
| <i>Fonsecaea pedrosoi</i> CBS 271.37                                         | 1           | 1           | 1         | 1          | 1          |
| <i>Fusarium fujikuroi</i> IMI 58289                                          | 1           | 1           | 1         | 1          | 1          |
| <i>Fusarium graminearum</i> v1.0                                             | 1           | 1           | 1         | 1          | 1          |
| <i>Fusarium oxysporum</i> f. sp. <i>lycopersici</i> 4287 v2                  | 3           | 8           | 1         | 1          | 1          |
| <i>Fusarium pseudograminearum</i> CS3096                                     | 1           | 1           | 1         | 1          | 1          |
| <i>Fusarium redolens</i> A4 v1.0                                             | 1           | 4           | 1         | 1          | 1          |
| <i>Fusarium verticillioides</i> 7600 v2                                      | 3           | 1           | 4         | 1          | 1          |
| <i>Gaeumannomyces graminis</i> var. <i>tritici</i> R3-111a-1                 | 1           | 1           | 2         | 1          | 1          |
| <i>Glarea lozoyensis</i> ATCC 20868                                          | 1           | 1           | 1         | 1          | 1          |
| <i>Glomerella acutata</i> ( <i>Colletotrichum fiorinae</i> MH 18) v1.0       | 2           | 1           | 1         | 1          | 1          |
| <i>Glomerella cingulata</i> 23 ( <i>Colletotrichum gloeosporoides</i> ) v1.0 | 3           | 1           | 1         | 1          | 1          |
| <i>Glonium stellatum</i> CBS 207.34 v1.0                                     | 2           | 2           | 2         | 1          | 1          |
| <i>Gremmeniella abietina</i> DAOM 170408 v1.0                                | 1           | 1           | 1         | 1          | 1          |
| <i>Grosmannia clavigera</i> kw1407                                           | 1           | 1           | 1         | 1          | 1          |
| <i>Gymnascella aurantiaca</i> v1.0                                           | 1           | 1           | 1         | 1          | 1          |
| <i>Gymnascella citrina</i> v1.1                                              | 1           | 1           | 2         | 1          | 1          |
| <i>Gyromitra esculenta</i> CBS101906 v1.0                                    | 1           | 1           | 1         | 1          | 1          |
| <i>Hanseniaspora valbyensis</i> NRRL Y-1626 v1.1                             | 1           | 1           | 1         | 1          | 1          |
| <i>Histoplasma capsulatum</i> NAM1                                           | 1           | 1           | 1         | 1          | 1          |
| <i>Hortaea acidophila</i> CBS 113389 v1.0                                    | 1           | 1           | 1         | 1          | 1          |
| <i>Hortaea werneckii</i> EXF-2000 M0 v1.0                                    | 1           | 2           | 2         | 2          | 2          |
| <i>Hymenoscyphus varicosporoides</i> PMI_453 v1.0                            | 1           | 1           | 1         | 1          | 1          |
| <i>Hyphopichia burtonii</i> NRRL Y-1933 v1.0                                 | 1           | 1           | 1         | 1          | 1          |
| <i>Hypoxylon</i> sp. CI-4A v1.0                                              | 1           | 1           | 1         | 1          | 1          |
| <i>Hypoxylon</i> sp. CO27-5 v1.0                                             | 1           | 1           | 1         | 1          | 1          |
| <i>Hypoxylon</i> sp. EC38 v3.0                                               | 1           | 1           | 1         | 1          | 1          |
| <i>Hysterium pulicare</i>                                                    | 2           | 1           | 1         | 1          | 1          |
| <i>Ilyonectria europaea</i> CBS 129078 v1.0                                  | 2           | 4           | 2         | 1          | 1          |
| <i>Ilyonectria robusta</i> PMI_751 v1.0                                      | 2           | 3           | 2         | 1          | 1          |
| <i>Ilyonectria</i> sp. v1.0                                                  | 2           | 2           | 2         | 1          | 1          |
| <i>Kalaharituber pfeilii</i> F3 v1.0                                         | 1           | 1           | 1         | 1          | 1          |
| <i>Karstenula rhodostoma</i> CBS 690.94 v1.0                                 | 1           | 1           | 1         | 1          | 1          |
| <i>Kazachstania africana</i> CBS 2517                                        | 1           | 2           | 1         | 1          | 1          |
| <i>Khuskia oryzae</i> ATCC 28132 v1.0                                        | 2           | 1           | 1         | 1          | 1          |
| <i>Kluyveromyces lactis</i>                                                  | 1           | 1           | 1         | 1          | 1          |
| <i>Kuraishia capsulata</i> CBS 1993                                          | 1           | 1           | 1         | 1          | 1          |
| <i>Lasiosphaeria miniovina</i> SMH2392-1A v1.0                               | 1           | 1           | 1         | 1          | 1          |
| <i>Lasiosphaeria hirsuta</i> SMH4607-1 v1.0                                  | 1           | 1           | 1         | 1          | 1          |

| <b>Ascomycota (510 genomes searched)</b>                    | <b>HMGS</b> | <b>HMGR</b> | <b>MK</b> | <b>PMK</b> | <b>MDD</b> |
|-------------------------------------------------------------|-------------|-------------|-----------|------------|------------|
| <i>Lecythophora</i> sp. AK0013 v1.0                         | 1           | 1           | 1         | 1          | 1          |
| <i>Lentithecium fluviatile</i> v1.0                         | 1           | 1           | 1         | 1          | 1          |
| <i>Lepidopterella palustris</i> v1.0                        | 2           | 1           | 1         | 1          | 1          |
| <i>Leptodontium</i> sp. PMI_412 v1.0                        | 1           | 2           | 2         | 1          | 1          |
| <i>Leptosphaeria maculans</i>                               | 1           | 1           | 1         | 1          | 1          |
| <i>Lindgomyces ingoldianus</i> ATCC 200398 v1.0             | 1           | 2           | 1         | 1          | 1          |
| <i>Lindra thalassiae</i> JK4322 v1.0                        | 1           | 1           | 1         | 1          | 1          |
| <i>Lineolata rhizophorae</i> ATCC 16933 v1.0                | 1           | 1           | 1         | 1          | 1          |
| <i>Lipomyces starkeyi</i> NRRL Y-11557 v1.0                 | 1           | 1           | 1         | 1          | 1          |
| <i>Lizonia empirigonia</i> CBS 542.76 v1.0                  | 1           | 6           | 2         | 1          | 1          |
| <i>Lobaria pulmonaria</i> Scotland v1.0                     | 1           | 1           | 1         | 1          | 1          |
| <i>Lodderomyces elongisporus</i> NRRL YB-4239               | 1           | 1           | 1         | 1          | 1          |
| <i>Lollipopaia minuta</i> P26; CBS 116597 v1.0              | 1           | 1           | 1         | 1          | 1          |
| <i>Lophiostoma macrostomum</i> v1.0                         | 1           | 1           | 1         | 1          | 1          |
| <i>Lophiotrema nucula</i> CBS 627.86 v1.0                   | 1           | 1           | 1         | 1          | 1          |
| <i>Lophium mytilinum</i> CBS 269.34 v1.0                    | 1           | 1           | 1         | 1          | 1          |
| <i>Loramyces juncicola</i> 46458 v1.0                       | 1           | 1           | 2         | 1          | 1          |
| <i>Loramyces macrosporus</i> CBS235.53 v1.0                 | 1           | 2           | 1         | 1          | 1          |
| <i>Macrophomina phaseolina</i> MS6                          | 3           | 1           | 1         | 1          | 1          |
| <i>Macroventuria anomochaeta</i> CBS 525.71 v1.0            | 1           | 2           | 1         | 1          | 1          |
| <i>Magnaporthe grisea</i> v1.0                              | 1           | 1           | 1         | 1          | 1          |
| <i>Magnaportheiopsis poae</i> ATCC 64411                    | 1           | 1           | 1         | 1          | 1          |
| <i>Mariannaea</i> sp. PMI_226 v1.0                          | 1           | 1           | 1         | 1          | 1          |
| <i>Marssonina brunnea</i> f. sp. <i>multigermtubi</i> MB_m1 | 1           | 2           | 1         | 1          | 1          |
| <i>Massarina eburnea</i> CBS 473.64 v1.0                    | 1           | 1           | 1         | 1          | 1          |
| <i>Massariosphaeria phaeospora</i> CBS 611.86 v1.0          | 1           | 1           | 1         | 1          | 1          |
| <i>Melanconium</i> sp. NRRL 54901 v1.0                      | 2           | 1           | 1         | 1          | 1          |
| <i>Melanomma pulvis-pyrius</i> v1.0                         | 1           | 1           | 2         | 1          | 1          |
| <i>Melanospora tiffanyae</i> F1KG0001 v1.0                  | 1           | 2           | 1         | 1          | 1          |
| <i>Meliniomyces bicolor</i> E v2.0                          | 1           | 2           | 1         | 1          | 1          |
| <i>Meliniomyces variabilis</i> F v1.0                       | 1           | 1           | 1         | 1          | 1          |
| <i>Metarhizium acridum</i> CQMa 102                         | 1           | 1           | 2         | 1          | 1          |
| <i>Metarhizium robertsii</i> ARSEF 23                       | 2           | 2           | 2         | 1          | 1          |
| <i>Metschnikowia bicuspidata</i> NRRL YB-4993 v1.0          | 1           | 1           | 1         | 1          | 1          |
| <i>Metschnikowia fructicola</i> 277                         | 1           | 3           | 1         | 2          | 2          |
| <i>Meyerozyma guilliermondii</i> ATCC 6260                  | 1           | 1           | 1         | 2          | 2          |
| <i>Microascus trigonosporus</i> CBS 218.31 v1.0             | 2           | 1           | 1         | 1          | 1          |
| <i>Microdochium bolleyi</i> J235TASD1 v1.0                  | 1           | 1           | 1         | 1          | 1          |
| <i>Microdochium trichocladiopsis</i> CBS 623.77 v1.0        | 1           | 1           | 2         | 1          | 1          |
| <i>Microsporium canis</i> CBS 113480                        | 3           | 2           | 2         | 1          | 1          |
| <i>Microthyrium microscopicum</i> CBS 115976 v1.0           | 1           | 1           | 1         | 1          | 1          |
| <i>Monacrosporium haptotylum</i> CBS 200.50                 | 1           | 1           | 1         | 1          | 1          |
| <i>Monascus purpureus</i> v1.0                              | 2           | 1           | 1         | 1          | 1          |
| <i>Monascus ruber</i> NRRL 1597 v1.0                        | 2           | 2           | 1         | 1          | 1          |
| <i>Morchella conica</i> CCBAS932 v1.0                       | 1           | 1           | 1         | 1          | 1          |

| <b>Ascomycota (510 genomes searched)</b>                                   | <b>HMGS</b> | <b>HMGR</b> | <b>MK</b> | <b>PMK</b> | <b>MDD</b> |
|----------------------------------------------------------------------------|-------------|-------------|-----------|------------|------------|
| <i>Morchella importuna</i> SCYDJ1-A1 v1.0                                  | 1           | 1           | 1         | 1          | 1          |
| <i>Myceliophthora heterothallica</i> CBS 202.75 v1.0                       | 1           | 1           | 1         | 1          | 1          |
| <i>Myceliophthora heterothallica</i> CBS 203.75 v1.0                       | 1           | 1           | 1         | 1          | 1          |
| <i>Myceliophthora thermophila</i> ( <i>Sporotrichum thermophile</i> ) v2.0 | 1           | 1           | 2         | 1          | 1          |
| <i>Mycosphaerella graminicola</i> v2.0                                     | 1           | 1           | 1         | 1          | 1          |
| <i>Myriangium duriae</i> CBS 260.36 v1.0                                   | 2           | 3           | 1         | 1          | 1          |
| <i>Myrothecium inundatum</i> CBS 120646 v1.0                               | 1           | 1           | 1         | 1          | 1          |
| <i>Mytilinidion resinicola</i> CBS 304.34 v1.0                             | 1           | 2           | 1         | 1          | 1          |
| <i>Nadsonia fulvescens</i> var. <i>elongata</i> DSM 6958 v1.0              | 1           | 1           | 1         | 1          | 1          |
| <i>Nakaseomyces bacillisporus</i> CBS 7720                                 | 1           | 1           | 1         | 1          | 1          |
| <i>Nakaseomyces delphensis</i> CBS 2170                                    | 1           | 1           | 1         | 1          | 1          |
| <i>Nectria haematococca</i> v2.0                                           | 2           | 2           | 1         | 1          | 1          |
| <i>Neofusicoccum parvum</i> UCRNP2                                         | 4           | 2           | 1         | 1          | 1          |
| <i>Neolecta irregularis</i> DAH-1 v1.0                                     | 1           | 2           | 1         | 2          | 2          |
| <i>Neonectria ditissima</i> R09/05                                         | 1           | 1           | 1         | 1          | 1          |
| <i>Neosartorya fischeri</i> NRRL 181                                       | 2           | 3           | 1         | 1          | 1          |
| <i>Neurospora crassa</i> FGSC 73 trp-3 v1.0                                | 1           | 1           | 1         | 1          | 1          |
| <i>Neurospora crassa</i> OR74A v2.0                                        | 1           | 1           | 1         | 1          | 1          |
| <i>Neurospora discreta</i> FGSC 8579 mat A                                 | 1           | 1           | 1         | 1          | 1          |
| <i>Neurospora tetrasperma</i> FGSC 2508 mat A v2.0                         | 1           | 1           | 1         | 1          | 1          |
| <i>Neurospora tetrasperma</i> FGSC 2509 mat a v1.0                         | 1           | 1           | 1         | 1          | 1          |
| <i>Niesslia exilis</i> CBS 358.70 v1.0                                     | 1           | 2           | 1         | 1          | 1          |
| <i>Ogataea parapolyomorpha</i> DL-1                                        | 1           | 1           | 1         | 1          | 1          |
| <i>Ogataea polymorpha</i> NCYC 495 leu1.1 v2.0                             | 1           | 1           | 0         | 1          | 1          |
| <i>Oidiodendron maius</i> Zn v1.0                                          | 1           | 2           | 1         | 1          | 1          |
| <i>Ophiobolus disseminans</i> CBS 113818 v1.0                              | 1           | 2           | 1         | 1          | 1          |
| <i>Ophiostoma novo-ulmi</i> subsp. <i>novo-ulmi</i> H327                   | 1           | 2           | 1         | 1          | 1          |
| <i>Ophiostoma piceae</i> UAMH 11346                                        | 1           | 1           | 2         | 1          | 1          |
| <i>Ophiostoma piliferum</i>                                                | 1           | 2           | 1         | 1          | 1          |
| <i>Pachysolen tannophilus</i> NRRL Y-2460 v1.2                             | 1           | 2           | 1         | 1          | 1          |
| <i>Paracoccidioides brasiliensis</i> Pb03                                  | 1           | 1           | 1         | 1          | 1          |
| <i>Paracoccidioides brasiliensis</i> Pb18                                  | 1           | 1           | 1         | 1          | 1          |
| <i>Paraconiothyrium sporulosum</i> AP3s5-JAC2a v1.0                        | 1           | 1           | 1         | 1          | 1          |
| <i>Patellaria atrata</i> v1.0                                              | 1           | 1           | 1         | 1          | 1          |
| <i>Penicillium antarcticum</i> IBT 31811                                   | 1           | 1           | 2         | 1          | 1          |
| <i>Penicillium bilaiae</i> ATCC 20851 v1.0                                 | 2           | 3           | 2         | 1          | 1          |
| <i>Penicillium brevicompactum</i> 1011305 v2.0                             | 1           | 2           | 1         | 1          | 1          |
| <i>Penicillium brevicompactum</i> AgRF18 v1.0                              | 1           | 2           | 1         | 1          | 1          |
| <i>Penicillium canescens</i> ATCC 10419 v1.0                               | 1           | 1           | 2         | 1          | 1          |
| <i>Penicillium chrysogenum</i> v1.0                                        | 2           | 3           | 1         | 1          | 1          |
| <i>Penicillium chrysogenum</i> Wisconsin 54-1255                           | 2           | 3           | 1         | 1          | 1          |
| <i>Penicillium coprophilum</i> IBT 31321                                   | 2           | 2           | 1         | 1          | 1          |
| <i>Penicillium decumbens</i> IBT 11843                                     | 1           | 1           | 1         | 1          | 1          |
| <i>Penicillium digitatum</i> Pd1                                           | 1           | 1           | 1         | 1          | 1          |

| <b>Ascomycota (510 genomes searched)</b>              | <b>HMGS</b> | <b>HMGR</b> | <b>MK</b> | <b>PMK</b> | <b>MDD</b> |
|-------------------------------------------------------|-------------|-------------|-----------|------------|------------|
| <i>Penicillium digitatum</i> PHI26                    | 1           | 1           | 1         | 1          | 1          |
| <i>Penicillium expansum</i> ATCC 24692 v1.0           | 2           | 2           | 1         | 1          | 1          |
| <i>Penicillium expansum</i> d1                        | 2           | 2           | 1         | 1          | 1          |
| <i>Penicillium fellutanum</i> ATCC 48694 v1.0         | 2           | 2           | 1         | 1          | 1          |
| <i>Penicillium flavigenum</i> IBT 14082               | 2           | 3           | 2         | 1          | 1          |
| <i>Penicillium glabrum</i> DAOM 239074 v1.0           | 2           | 2           | 1         | 1          | 1          |
| <i>Penicillium griseofulvum</i> PG3                   | 2           | 2           | 1         | 1          | 1          |
| <i>Penicillium italicum</i> PHI-1                     | 1           | 1           | 1         | 1          | 1          |
| <i>Penicillium janthinellum</i> ATCC 10455 v1.0       | 2           | 1           | 1         | 1          | 1          |
| <i>Penicillium lanosocoeruleum</i> ATCC 48919 v1.0    | 2           | 3           | 1         | 1          | 1          |
| <i>Penicillium nalgiovense</i> FM193                  | 2           | 2           | 1         | 1          | 1          |
| <i>Penicillium oxalicum</i> 114-2                     | 2           | 1           | 1         | 1          | 1          |
| <i>Penicillium polonicum</i> IBT 4502                 | 2           | 2           | 0         | 1          | 1          |
| <i>Penicillium raistrickii</i> ATCC 10490 v1.0        | 2           | 1           | 1         | 1          | 1          |
| <i>Penicillium solitum</i> IBT 29525                  | 2           | 4           | 1         | 1          | 1          |
| <i>Penicillium steckii</i> IBT 24891                  | 1           | 1           | 1         | 1          | 1          |
| <i>Penicillium subrubescens</i> FBCC1632 / CBS132785  | 2           | 1           | 1         | 1          | 1          |
| <i>Penicillium thymicola</i> DAOMC 180753 v1.0        | 2           | 2           | 2         | 1          | 1          |
| <i>Penicillium vulpinum</i> IBT 29486                 | 1           | 2           | 1         | 1          | 1          |
| <i>Periconia macrospinoso</i> DSE2036 v1.0            | 2           | 5           | 1         | 1          | 1          |
| <i>Phaeoacremonium aleophilum</i> UCRPA7              | 1           | 1           | 1         | 1          | 1          |
| <i>Phaeoacremonium</i> sp. FL0889 v1.0                | 1           | 1           | 1         | 1          | 1          |
| <i>Phaeomoniella chlamydospora</i> UCRPC4             | 1           | 1           | 1         | 1          | 1          |
| <i>Phaeosphaeriaceae</i> sp. PMI_808 v1.0             | 2           | 4           | 1         | 1          | 1          |
| <i>Phialocephala scopiformis</i> 5WS22E1 v1.0         | 1           | 2           | 1         | 1          | 1          |
| <i>Phialophora attae</i> CBS 131958                   | 1           | 1           | 1         | 1          | 1          |
| <i>Phoma tracheiphila</i> IPT5 v1.0                   | 1           | 1           | 1         | 1          | 1          |
| <i>Phyllosticta capitalensis</i> CBS 128856 v1.0      | 1           | 1           | 1         | 1          | 1          |
| <i>Phyllosticta citriasiana</i> v1.0                  | 1           | 1           | 1         | 1          | 1          |
| <i>Phyllosticta citribraziliensis</i> CBS 100098 v1.0 | 1           | 1           | 1         | 1          | 1          |
| <i>Phyllosticta citricarpa</i> CBS 127454 v1.0        | 1           | 1           | 1         | 0          | 0          |
| <i>Phyllosticta citrichinaensis</i> CBS 130529 v1.0   | 1           | 1           | 1         | 1          | 1          |
| <i>Phyllosticta</i> sp. CPC 27169 v1.0                | 1           | 1           | 1         | 1          | 1          |
| <i>Phyllosticta</i> sp. CPC 27913 v1.0                | 1           | 1           | 1         | 1          | 1          |
| <i>Pichia membranifaciens</i> v2.0                    | 1           | 1           | 1         | 1          | 1          |
| <i>Pichia pastoris</i>                                | 1           | 1           | 1         | 1          | 1          |
| <i>Pichia stipitis</i> v2.0                           | 1           | 1           | 1         | 1          | 1          |
| <i>Piedraia hortae</i> v1.1                           | 1           | 1           | 1         | 1          | 1          |
| <i>Plectania melastoma</i> CBS 918.72 v1.0            | 1           | 1           | 1         | 1          | 1          |
| <i>Plectosphaerella cucumerina</i> DS2psM2a2 v1.0     | 1           | 2           | 1         | 1          | 1          |
| <i>Pleomassaria siparia</i> v1.0                      | 1           | 1           | 1         | 1          | 1          |
| <i>Pneumocystis jirovecii</i>                         | 1           | 2           | 0         | 1          | 1          |
| <i>Podospora anserina</i> S mat+                      | 1           | 1           | 1         | 1          | 1          |
| <i>Podospora curvicolla</i> TEP21a v1.0               | 1           | 1           | 1         | 1          | 1          |
| <i>Polychaeton citri</i> v1.0                         | 1           | 1           | 1         | 1          | 1          |



| <b>Ascomycota (510 genomes searched)</b>                | <b>HMGS</b> | <b>HMGR</b> | <b>MK</b> | <b>PMK</b> | <b>MDD</b> |
|---------------------------------------------------------|-------------|-------------|-----------|------------|------------|
| <i>Polyplosphaeria fusca</i> CBS 125425 v1.0            | 1           | 1           | 1         | 1          | 1          |
| <i>Protomyces inouyei</i>                               | 1           | 1           | 1         | 1          | 1          |
| <i>Protomyces lactucaedebilis</i> 12-1054 v1.0          | 1           | 1           | 1         | 1          | 1          |
| <i>Pseudocercospora (Mycosphaerella) fijiensis</i> v2.0 | 1           | 1           | 1         | 1          | 1          |
| <i>Pseudographis elatina</i>                            | 1           | 1           | 1         | 1          | 1          |
| <i>Pseudogymnoascus destructans</i> 20631-21            | 1           | 1           | 1         | 1          | 1          |
| <i>Pseudomassariella vexata</i> CBS 129021 v1.0         | 2           | 1           | 1         | 1          | 1          |
| <i>Pseudovirgaria hyperparasitica</i> CBS 121739 v1.0   | 1           | 1           | 1         | 1          | 1          |
| <i>Purpureocillium</i> sp. UdeA0106 v1.0                | 1           | 2           | 1         | 1          | 1          |
| <i>Pyrenochaeta lycopersici</i> ISPaVe ER 1252 v1.0     | 1           | 2           | 1         | 1          | 1          |
| <i>Pyrenochaeta</i> sp. DS3sAY3a v1.0                   | 1           | 2           | 1         | 1          | 1          |
| <i>Pyrenophora teres</i> f. <i>teres</i>                | 1           | 1           | 1         | 1          | 1          |
| <i>Pyrenophora tritici-repentis</i>                     | 1           | 1           | 1         | 1          | 1          |
| <i>Pyronema confluens</i> CBS100304                     | 1           | 1           | 1         | 1          | 1          |
| <i>Rhizodiscina lignyota</i> CBS 133067 v1.0            | 1           | 1           | 1         | 1          | 1          |
| <i>Rhizoscyphus ericae</i> UAMH 7357 v1.0               | 1           | 1           | 1         | 1          | 1          |
| <i>Rhytidhysterium rufulum</i>                          | 1           | 1           | 1         | 1          | 1          |
| <i>Rutstroemia firma</i> CBS 115.86 v1.0                | 1           | 1           | 1         | 1          | 1          |
| <i>Saccharata proteae</i> CBS 121410 v1.0               | 1           | 1           | 1         | 1          | 1          |
| <i>Saccharomyces cerevisiae</i> M3707 Dikaryon          | 1           | 2           | 1         | 1          | 1          |
| <i>Saccharomyces cerevisiae</i> M3836 v1.0              | 1           | 2           | 1         | 1          | 1          |
| <i>Saccharomyces cerevisiae</i> M3837 v1.0              | 1           | 2           | 1         | 1          | 1          |
| <i>Saccharomyces cerevisiae</i> M3838 v1.0              | 1           | 2           | 1         | 1          | 1          |
| <i>Saccharomyces cerevisiae</i> M3839 v1.0              | 1           | 2           | 1         | 1          | 1          |
| <i>Saccharomyces cerevisiae</i> S288C                   | 1           | 2           | 1         | 1          | 1          |
| <i>Saccharomyces cerevisiae</i> YB210 v1.0              | 1           | 2           | 1         | 1          | 1          |
| <i>Saitoella complicata</i> NRRL Y-17804 v1.0           | 1           | 1           | 1         | 1          | 1          |
| <i>Sarcoscypha coccinea</i> ATCC 58028 v1.0             | 1           | 1           | 1         | 1          | 1          |
| <i>Schizosaccharomyces cryophilus</i> OY26              | 1           | 1           | 1         | 1          | 1          |
| <i>Schizosaccharomyces japonicus</i> yFS275             | 1           | 1           | 1         | 1          | 1          |
| <i>Schizosaccharomyces octosporus</i> yFS286            | 1           | 1           | 1         | 1          | 1          |
| <i>Schizosaccharomyces pombe</i>                        | 1           | 1           | 1         | 1          | 1          |
| <i>Schizothecium vesticola</i> SMH3187-1 v1.0           | 1           | 1           | 1         | 1          | 1          |
| <i>Sclerophora sanguinea</i> CBS100924 v1.0             | 1           | 1           | 1         | 1          | 1          |
| <i>Sclerotinia sclerotiorum</i> v1.0                    | 2           | 1           | 1         | 1          | 1          |
| <i>Septoria musiva</i> SO2202 v1.0                      | 1           | 1           | 1         | 1          | 1          |
| <i>Septoria populicola</i> v1.0                         | 1           | 1           | 1         | 1          | 1          |
| <i>Setomelanomma holmii</i> CBS 110217 v1.0             | 1           | 3           | 2         | 1          | 1          |
| <i>Setosphaeria turcica</i> Et28A v2.0                  | 1           | 2           | 1         | 1          | 1          |
| <i>Setosphaeria turcica</i> NY001 v2.0                  | 1           | 2           | 1         | 1          | 1          |
| <i>Sodiomyces alkalinus</i> v1.0                        | 1           | 1           | 1         | 1          | 1          |
| <i>Spathaspora passalidarum</i> NRRL Y-27907 v2.0       | 1           | 1           | 1         | 1          | 1          |
| <i>Spathularia flavida</i>                              | 1           | 1           | 1         | 1          | 1          |
| <i>Sporopachydermia lactativora</i> Phaff 68-199 v1.0   | 1           | 1           | 1         | 1          | 1          |
| <i>Sporormia fimetaria</i> v1.0                         | 1           | 1           | 1         | 1          | 1          |

| <b>Ascomycota (510 genomes searched)</b>             | <b>HMGS</b> | <b>HMGR</b> | <b>MK</b> | <b>PMK</b> | <b>MDD</b> |
|------------------------------------------------------|-------------|-------------|-----------|------------|------------|
| <i>Stachybotrys elegans</i> LAHC-LSPK-M15 v1.0       | 1           | 1           | 1         | 1          | 1          |
| <i>Stagonospora nodorum</i> SN15 v2.0                | 1           | 1           | 1         | 1          | 1          |
| <i>Stagonospora</i> sp. SRC1lsM3a v1.0               | 1           | 1           | 1         | 1          | 1          |
| <i>Stanjemonium grisellum</i> CBS 655.79 v1.0        | 1           | 2           | 1         | 1          | 1          |
| <i>Stemphylium lycopersici</i> CIDEFI-216            | 1           | 1           | 1         | 1          | 1          |
| <i>Sugiyamaella americana</i> NRRL YB-2067 v1.0      | 1           | 1           | 1         | 1          | 1          |
| <i>Symbiotaphrina kochii</i> v1.0                    | 1           | 1           | 1         | 1          | 1          |
| <i>Sympodiomyces attinorum</i> NRRL Y-27639 v1.0     | 1           | 1           | 1         | 1          | 1          |
| <i>Talaromyces aculeatus</i> ATCC 10409 v1.0         | 1           | 1           | 1         | 1          | 1          |
| <i>Talaromyces marneffeii</i> ATCC 18224             | 3           | 1           | 1         | 1          | 1          |
| <i>Talaromyces proteolyticus</i> PMI_201 v1.0        | 2           | 1           | 1         | 1          | 1          |
| <i>Talaromyces stipitatus</i> ATCC 10500             | 1           | 1           | 1         | 1          | 1          |
| <i>Taphrina deformans</i>                            | 1           | 1           | 1         | 1          | 1          |
| <i>Teratosphaeria nubilosa</i> CBS 116005 v1.0       | 2           | 1           | 1         | 1          | 1          |
| <i>Terfezia boudieri</i> ATCC MYA-4762 v1.1          | 2           | 1           | 1         | 1          | 1          |
| <i>Terfezia claveryi</i> T7 v1.0                     | 1           | 1           | 1         | 1          | 1          |
| <i>Thelebolus microsporus</i> ATCC 90970 v1.0        | 1           | 1           | 1         | 1          | 1          |
| <i>Thelebolus stercoreus</i>                         | 1           | 1           | 1         | 1          | 1          |
| <i>Thermoascus aurantiacus</i> v1.0                  | 1           | 1           | 1         | 1          | 1          |
| <i>Thermomyces lanuginosus</i> SSBP                  | 1           | 1           | 1         | 1          | 1          |
| <i>Thielavia antarctica</i> CBS 123565 v1.0          | 1           | 1           | 2         | 1          | 1          |
| <i>Thielavia appendiculata</i> CBS 731.68 v1.0       | 2           | 1           | 1         | 1          | 1          |
| <i>Thielavia arenaria</i> CBS 508.74 v1.0            | 1           | 1           | 1         | 1          | 1          |
| <i>Thielavia hyrcaniae</i> CBS 757.83 v1.0           | 1           | 1           | 1         | 1          | 1          |
| <i>Thielavia terrestris</i> v2.0                     | 1           | 1           | 1         | 1          | 1          |
| <i>Thozetella</i> sp. PMI_491 v2.0                   | 1           | 1           | 1         | 1          | 1          |
| <i>Tolyposcladium inflatum</i> NRRL 8044             | 1           | 1           | 2         | 1          | 1          |
| <i>Torpedospora radiata</i> JK5252C v1.0             | 1           | 1           | 2         | 1          | 1          |
| <i>Tortispora caseinolytica</i> Y-17796 v1.0         | 1           | 1           | 1         | 1          | 1          |
| <i>Torulasporea delbrueckii</i> CBS 1146             | 1           | 1           | 1         | 1          | 1          |
| <i>Tothia fuscella</i> CBS 130266 v1.0               | 1           | 1           | 1         | 1          | 1          |
| <i>Trematosphaeria pertusa</i> CBS 122368 v1.0       | 2           | 1           | 2         | 1          | 1          |
| <i>Trichodelitschia bisporula</i> CBS 262.69 v1.0    | 1           | 1           | 1         | 1          | 1          |
| <i>Trichoderma asperellum</i> CBS 433.97 v1.0        | 1           | 1           | 1         | 1          | 1          |
| <i>Trichoderma asperellum</i> TR356 v1.0             | 0           | 1           | 1         | 1          | 1          |
| <i>Trichoderma atroviride</i> v2.0                   | 1           | 1           | 1         | 1          | 1          |
| <i>Trichoderma citrinoviride</i> TUCIM 6016 v4.0     | 1           | 1           | 1         | 1          | 1          |
| <i>Trichoderma gamsii</i> T6085                      | 1           | 1           | 1         | 1          | 1          |
| <i>Trichoderma harzianum</i> CBS 226.95 v1.0         | 1           | 1           | 1         | 1          | 1          |
| <i>Trichoderma harzianum</i> TR274 v1.0              | 1           | 1           | 1         | 1          | 1          |
| <i>Trichoderma longibrachiatum</i> ATCC 18648 v3.0   | 1           | 1           | 1         | 1          | 1          |
| <i>Trichoderma reesei</i> RUT C-30 v1.0              | 1           | 1           | 1         | 1          | 1          |
| <i>Trichoderma reesei</i> v2.0                       | 1           | 1           | 1         | 1          | 1          |
| <i>Trichoderma virens</i> Gv29-8 v2.0                | 1           | 1           | 1         | 1          | 1          |
| <i>Trichomonascus petasosporus</i> NRRL YB-2093 v1.0 | 1           | 1           | 1         | 1          | 1          |

| <b>Ascomycota (510 genomes searched)</b>          | <b>HMGS</b> | <b>HMGR</b> | <b>MK</b> | <b>PMK</b> | <b>MDD</b> |
|---------------------------------------------------|-------------|-------------|-----------|------------|------------|
| <i>Trichophaea hybrida</i> UTF0779 v1.0           | 0           | 0           | 0         | 0          | 0          |
| <i>Trichophyton rubrum</i> CBS 118892             | 2           | 1           | 1         | 1          | 1          |
| <i>Trichophyton verrucosum</i> HKI 0517           | 1           | 1           | 1         | 1          | 1          |
| <i>Trinosporium guianense</i> CBS132537 v1.0      | 1           | 1           | 2         | 1          | 1          |
| <i>Truncatella angustata</i> HP017 v1.0           | 1           | 1           | 1         | 1          | 1          |
| <i>Trypethelium eluteriae</i> v1.0                | 1           | 1           | 1         | 1          | 1          |
| <i>Tuber borchii</i> Tbo3840 v1.0                 | 1           | 1           | 1         | 1          | 1          |
| <i>Tuber melanosporum</i> Mel28 v1.0              | 3           | 1           | 1         | 1          | 1          |
| <i>Uncinocarpus reesii</i> 1704                   | 1           | 1           | 1         | 1          | 1          |
| <i>Usnea florida</i> ATCC18376 v1.0               | 2           | 2           | 1         | 1          | 1          |
| <i>Ustilaginoidea virens</i>                      | 1           | 1           | 1         | 1          | 1          |
| <i>Valetoniellopsis laxa</i> CBS 191.97 v1.0      | 1           | 1           | 1         | 1          | 1          |
| <i>Venturia inaequalis</i>                        | 1           | 1           | 1         | 1          | 1          |
| <i>Venturia pirina</i>                            | 1           | 1           | 1         | 1          | 1          |
| <i>Verruconis gallopava</i>                       | 1           | 1           | 1         | 1          | 1          |
| <i>Verruculina enalia</i> CBS 304.66 v1.0         | 1           | 1           | 1         | 1          | 1          |
| <i>Verticillium alfalfae</i> VaMs.102             | 1           | 1           | 1         | 1          | 1          |
| <i>Verticillium dahliae</i> v1.0                  | 1           | 1           | 1         | 1          | 1          |
| <i>Westerdykella ornata</i> CBS 379.55 v1.0       | 2           | 1           | 1         | 1          | 1          |
| <i>Wickerhamiella domercqiae</i> NRRL Y-6692 v1.0 | 1           | 1           | 1         | 1          | 1          |
| <i>Wickerhamomyces anomalus</i> NRRL Y-366-8 v1.0 | 1           | 1           | 1         | 1          | 1          |
| <i>Wilcoxina mikolae</i> CBS 423.85 v1.0          | 2           | 1           | 1         | 1          | 1          |
| <i>Xanthoria parietina</i> 46-1-SA22 v1.1         | 1           | 1           | 1         | 1          | 1          |
| <i>Xylaria hypoxylon</i> OSC100004 v1.0           | 1           | 1           | 1         | 1          | 1          |
| <i>Xylariales</i> sp. PMI_506 v1.0                | 1           | 1           | 1         | 1          | 1          |
| <i>Xylona heveae</i> TC161 v1.0                   | 2           | 1           | 1         | 1          | 1          |
| <i>Yarrowia lipolytica</i> (strain CLIB122)       | 1           | 1           | 1         | 1          | 1          |
| <i>Yarrowia lipolytica</i> FKP355 v1.0            | 1           | 1           | 1         | 1          | 1          |
| <i>Zasmidium cellare</i> ATCC 36951 v1.0          | 1           | 1           | 1         | 1          | 1          |
| <i>Zopfia rhizophila</i> v1.0                     | 1           | 1           | 1         | 1          | 1          |
| <i>Zygoascus hellenicus</i> Y-7136 v1.0           | 1           | 1           | 1         | 1          | 1          |
| <i>Zygosaccharomyces rouxii</i> CBS732            | 1           | 1           | 1         | 1          | 1          |
| <i>Zymoseptoria ardabiliae</i> STIRO4_1.1.1       | 1           | 1           | 1         | 1          | 1          |
| <i>Zymoseptoria brevis</i> Zb18110                | 1           | 1           | 1         | 1          | 1          |
| <i>Zymoseptoria pseudotritici</i> STIRO4_2.2.1    | 1           | 1           | 1         | 1          | 1          |

**Table S6**

Examples of additional putative HMGS genes identified in fungal genomes from Tables S4 and S4 that are clustered or potentially fused (annotated with: ?) with predicted STS genes.

| <b>HMGS protein ID</b>               | <b>STS protein ID</b>  | <b>Organism</b>                | <b>Fungal Class</b> |
|--------------------------------------|------------------------|--------------------------------|---------------------|
| 114927                               | 1602279                | <i>Auriscalpium vulgare</i>    | Basidiomycota       |
| 32419                                | 324119 (HMGS fusion?)  | <i>Hebeloma cylindrosporum</i> | Basidiomycota       |
| 2392737<br>(2701676 also in cluster) | 2392761 (HMGS fusion?) | <i>Ricknella fibula</i>        | Basidiomycota       |
| 290222                               | 290216                 | <i>Hebeloma cylindrosporum</i> | Basidiomycota       |
| 6366                                 | 6367                   | <i>Macrophomina phaseolina</i> | Ascomycota          |
| 7969                                 | 7973                   | <i>Neofusicoccum parvum</i>    | Ascomycota          |
| 687465                               | 658201                 | <i>Coniochaeta ligniaria</i>   | Ascomycota          |

### III. Supplemental Data Set

#### Fungal sesquiterpene synthase genomic DNA sequences

##### 1. Genomic Sequences obtained from published accession numbers (see also “Bioinformatic analysis”)

| Name   | Accession number |
|--------|------------------|
| ARMGA1 | P0DL13           |
| FgCLM1 | GU123140         |
| FsTS   | P13513           |
| Ffsc6  | HF563561.1       |
| Ffsc4  | HF563560.1       |
| BcBOT2 | AAQ16575.1       |
| PrAS   | W6Q4Q9           |
| AtAS   | Q9UR08           |
| BcBOT2 | AAQ16575.1       |

##### 2. Manually re-predicted genomic DNA sequences in this work and from (5, 8, 9):

>HS-HMGS

```
ATGTCTGAAACCAAAGTTGGCAAAGTTGCTCCCTCCCCCTTCCC GGCGCGCCATACCCTCCTGTTGTAATCA
TCCGCGATGGAAAGGTATGTTCACTCGTTATTGGCTGCTGTGTTTTGCTTACGCCACTGCCTCAGAACTCTACA
GGCTCCATGATGAGTGGATGATGAAGTACTGGCCGTTACGACGCGAGAAGAAGAGGGCTCGTATTCCGTTTCATGA
ACCTCGCGGGTTTCAGTACATGGTGTACGTATACAATGTGTCTCTGCTTCTACAATCCTCTAACCAGACGCATAGGT
GCACCTGCCGCTGACTTTGATCGCATGGTCTGGGGTGCCCGCATCGCTGGCATATTTTTCTGGCCGACGATTATA
TCGACAGCGGGAAAATGTTGGACCGCATCCCAGGCTTCAAAGCGGTATGCACGTTTCTGTATTGACTGCAGCTAC
TCGAGCCTGACGCACAATGCCGTACCTAGGCTGCCACAGGAACCGGGGTGTGTGGTTTTTCCGTATCTATAGTCTT
TTCAAGCCTTCTGAAATATCATATCTTCTAGCCCTCCACAAAGAGGACCAAGCAGAGATCTGTCACGATATCGT
GTTCCGTGCCATCAAGGCAACCAGTCACCCTCGGACCTTCGACCAGCTCACGAAGTGCACACATGAGTGGTGGGA
TACGTCCATACGTTCTTCATATACTTTGACTTCTCGATAACCCCTTGCCGAACAACAGTTCCAACATCCACGAGCC
TTCCAGAATCTCGACCAATATCTCGCAGTACGCCGTGTAACATAGCCATGGTCAGTCTATGCGTTTACTACCGAT
TCGTCACGTTGCTAATATCGTCTATCCGTTCTAGTATTTTGCGAACGGTAAGAACCAAATATAAAGACCGTGCGG
CAAATTCTAATAGCTATCATTTTCAGCTTACTTCCGTTACACCCTGGACATCAACCTTACCGACGAGCAGGTCAACCA
CCCCCTGATGCGCGAAGCTGAAGGCATTGTCTCCGTAAGAGTCTCCGCCATTTCAATTGATGCTGTCGTCATTA
AATATCACCTCTCAGACCACGTCGGCCTCACCAACGATTTCTTCTTATCTTAAGGAGAAGATGACCAATTCCGAC
GACACCAACATTATCCGCATCCTAATGGACCACGAGCATCTCAGCTACGAAGAGGCGAAGACCGTCATCGAAAAG
AAGATTCGCCAGAAGGAGCAGGACTTCATTGGCGCAGGGATGGCCGTGTTGAACGACCCTGAACCGGAAAGGA
TCGTGAGATCTATAGGTGGATCGCGAACTTACAGTACTGTATGGGCGGTAACCTTGCTTGGTCGCAAGAGGTAAG
CGAAAATCACTATGGTATCCACGTA CTGACATCACCTAACAGTTCGTTTACAGAGCGGCAGGTATAATGTCGGTG
TCATCGATGGGATTTGTTCCCTTCTT GAGCTACGCGGCGGAGCCAACCTCCGAAGACGAAGTGGTCGACGACA
CTGAGGAGAGCAGGCTCCGCGAGCTGATCTTCAACGTCAAGGACATTCCTCCTCTGACTTCACTATCGATGACGA
CGCCATCTTCATGACCAACCCGCACAGCCATCTTCAAGACAACGTTGTACCTCTCCCGCTCCTGAGAACGTCGGTA
TAATTGGTCTAGAAGTTTATTTCCCAAACGCGTAGGTTGCTCGGTTTATTCTTCTCTACGCAATATTCCTAATTACT
GGTACAGTGCATCTCCATTGACGCGCTGGAGGACTTCGACGGCGTCGCGAAGGGCAAGTACACGATCGGCCTCG
GGCAGCAGTACCTCGCTTACGCGACGACCGGAAGATATCAACTCCTTCGCTCTTTCCGCAGTGTCTCCCTTCTC
GAGAAGTACAACATTGATCCGCGCAGCATCGGTGCGCTCGACGTCGGGACGGAGACTCTCATCGACAAGTCCAAG
TCTGTCAAGACAACGCTCATGGACCTTTTCGCTGCCTCGGGCAACCACGACGTCGAAGGAATCGACAGCAAGAAC
```

GCTTGTATGGGTCGACGGCTGCTGTTCTGAACGCCGTCAACTGGATAGAGAGCTCGAGTTGGGACGGAAGATAC  
GCTATCGTGTTCAGGTGATATTGCAATCTATGCGGAGGGTCCGGCCAGACCTGTCGGGGGAGCGGGAGCCGT  
CGCGCTCTGATCGGACCAGACGCACCCCTTGTCTTGAACGTATGTCCTTTTTTTGTTCTTATTGAGCCTATTGAGAC  
CACCTAGCTGACGCACATTATTTAGCTACACATGGCGTACGTTATACTCACTCTTCTTATGGCAGACCACTCAGCT  
GACAGATATGTTTCAGTCTTACATGGCCAACACCTACGACTTCTACAAGCCTCGCATGGAATCCGAATATCCCCTG  
GTCGACGGTCTTCTTCTGTCACCACCTACATTACCGCGTTGGACGAGAGCTTCAAGGCGTACCAGCGGAAGGTGC  
AGGAGGGCTCTTCTCGAGATGTTCCCCGCCATACGCGAACGGGGCCAACGGAAGGCATCCGCCACGAAGTCC  
GTCAAACCTCTCCGATTTGACTATTCTGTCTTCCATAGCCCATACGGCAAGCTTGTACAAAAGCTTACGGTGCCT  
GGTACGCAGTCCCCTTCGCGAGTGTGTTGTTGATTTCTCAACCTTTTTATTGCGAGACCTACCAGACTTCGTAGCC  
CACCTACTGCTCCGGTCTACAGAGATCTTCCACCACATTCTGAGCAAGGATGCTTCGGCAACCCTGACGGACA  
AGTCTGTCGAGAAGACCTTCGCCGCCCTCCGCATCCATGTACAAGCAAGTGGTCACCCCATCGTTCTCATCTCC  
AACCGCTGCGGTAACATGTACACCGGCTCCCTCTACGGAGGTCTTGCCTCCCTCCTGACAAGCATTCTTCGTACGA  
GCTGTTGACAAGCGTATCTCGATGTTGCGGTATGGTAGTGGTTGTGCGAGCACCTTCTTCGCCATCAAGGTTCCGG  
GGCGATACGTCTCATATCAAGGCGAAGCTGGATTTGGAGAGGAGACTTGGCGGAGATGGATGTTCCGCCGTGCGA  
GGATTACGTTGTAGCGCTCAAGGTGAGTTGCTTTCATCTTACCTGTTCTCTCCACCTACTGATTGATTGCTCTGC  
TCTTAGCTTCGCGAGGAGACCCACAATGCTCCTTCGTACATTCCGAATGACTCAGATGCGGGCCTCTGGCCCCGC  
TCATACCGCCTTGAAGCCGTGGACGGGAAGTACAGGAGTTCGTATACCGTCACCCATTGA

>Stehi128017

ATGGCTACTTCAAATCCTCCCTCCACCCCTCATCACGAGTCATTAATCCTCCCTGACCTGCTTTCTGTGCGACACCTT  
TCAATGGCTCGACAAACCCGCACTGGGCCATGGCCGCCCCAGAATCTTACGCTGGGTCTCTAGTTACAACCTCTT  
CTCAGACCCGGAAGCGGACTGACTTCACTAGTTCGAACTCCTCGTCTCACACACATATCCTCATGCCGATT  
ATGATGCCTTTCGAACATGTTGTGACTTTGAAACTTGCTGTTGTCATTGACGAGATTAGCGACGATCAGAGCGG  
AAAGGCCGCGAGACGGACAGGGGAGGTGTATCTGAACGCGATGCGCGATCCTGAATGGACAGATGGCTCTGACT  
TGCGGAAGATGACACAACAGTAAGCACTAGCGTGTGTTTTTTTTTCGCTTCTTAAGCTCAGGGCGCACTGACGCTAA  
CATGCACTTTGACTTTGGCTCAACTCATTATCCGCAGATTTGCGCGCGTTCCTTGAGGTGCGTTCGGACCTCAATCC  
TTCCGTGCTTCTGAGGCACAGCGAAGACTACATCGACTGCGTGGCTAAGGAGGCAGAATATCGCGAACGGGG  
ACAAGTGTCTGACATGGATTCTTCAAGTCCCTCAGGAGGGAGAAGTCAAGGATCCGGTTGTGCTTCGGCCTGTT  
GAGTTCACGTTAGGGATCGATCTTCCGATTAGTGTGTTGAGGATGAGACGTTTCAAGATGTACTGGGCCTCG  
GCGGACATGGTGTGTTGGGCAAATGTGAGTGACACCACACACACCTCACTCCCTCCCTCCTCTCCTATCAATCT  
TAGGCACAATGGATGTCGGGGCTGACATATGTCATAACTTGGTTCGGAAGGACGTATACTCGTATAACGTGGAACA  
AGCTAAGGGTACAGTGGGAATAACATCGTTACCGTCTGATGGCTGCGAGAGACATTGACATGCAGGCTGCGA  
GCGACTACGTCGGTGAAGTACTATGCGGAGTTAATGGAGGAGTACATGACGGCCAAGGCGGAAGTGGCGTCAAG  
TCGTTCCGGTTCGAGGGATCTGGATGAGGACGTTTGGAAATATGTGAACGCGATGGAGAAGTGGCCGATTGGAA  
TTTGAGTGGTCTTCAAACGAACAGGTAAGCTGAAGGATTGCTGAATCTAAGCATATGAAGTTGACGATTTCT  
GGTATATGTAGTACTTCGGCACTCTACACGACGAAGTGAACGACGCGATTGGTCGTGATCAAGCCTCGGAAA  
GTCGTTGTTAG

>Stehi25180

ATGACAGTCGTGGACAGCCACAACGTTTCTATATCCCAATTGCCTCGAGTACTGGCCCTGGCCTCGCCACATCA  
ATCCTCATTATCAGGAAGTGAAGAAGGCTTCCGCTGCCTGGGCCGAAAGCTTCGGTGCCTTCAACCCAAAGGCTC  
AACACGCGTATAATGCCTGCGATTTAGTGTGTTACAGTCAATTCCTATATCGAGGACTTCGAGTGGGCCACTCA  
CCATAGTCTACTATAGACTTGTGGCTTCGCTCGCATACCCCTCGAGTCTGAAGGTGAGTAACTCACTCGTCTGC  
TTTGCAACGACGAGAGATTTAAACGGTGTGTAGAAGTCTGCGTACCGGGTGCACCTCATGAATATGTTCTTCGT  
ATTGACGAATACTCCGACGCTCTTACCAAAGGACGTTATCCAACAAGTGCATCATAATGGATGCTCTGCGC  
AACCCATACGCGCCTCGTCTGACGATGAATGGGTGCGCGGAGAAGTTACCAGACAGTACGTTCCACGACACACA  
AACCCACACCAAGAAAGTACTCTGACACGGCAGGAACAGATTCTGGAAGCGTGCCATCAAGACCGCCACCGCAGG  
GGCACAAGACGGTTTATCGATGCGTTCGAAAGCTATACGCAGTCAAGTTCGTTCAACAAGCGAAGGATCGCCACCA

CGGGTTCATTGACGTCGACAGCTATCTCGAGATGCGAAGAGAGACGATCGGCGCGAAGCCGTCGTTGTCGTCG  
CCTCCAGATGGACATGACCCCTCCAGACGAGGTTCTCGCTACCCGGTCATCCAACAGCTGTCTGCCCTGTCCACTG  
ATATGATATGTCTTGAAACGTACGTTAGTCTGACCACTTCGCAGAGACGGCTCATTAGATACTCTGGACCGTAC  
AGGACATCTGCTTTATAATGTCGAGCAGGCTCGCGGCGACGACCTCCACAACATCATCACGATAGCGATGAACCA  
GTTTGATATCGATATCGCCGGTGAATGGATTGGGTTGTGAAGTATCACGCGAAACTCGAGCGAAAGTTCTCTAC  
CTTTACAATAACGGTCTTCCATCATGGGGCAAGGAGCTAGACCCGAGGTGGAGCGGTACGTCTGTGGATTAGGA  
AACTGGGTTTCGCGCCAGTGACCAGTGGGGGTTGAAAGCGAGCGATACTTTGGCAAAAAGGGGAAGGAGATTTT  
CAAGAGGAGGTGGTGAACCTTGATGCAGCCGGAGAGAGCGCAGGACATCGGTCCGACATTGGTTGATGGGACC  
AGATTATGA

>Stehi64702

ATGGTTCGCTCTCCCGTTTCCGATAAGTTCTGCATACCGGACACGCTAGCCAGCTGGCCTTACCCTGTATACTCAA  
CCCCACTATGCCGAGGAGAAAAGCGGCGTCCGCTGCCTGGACGAAGGGCTTTGGCGCTTTTGGCCCGAAAAGCGCA  
GGATGCGTTCGATCGTTGCGACTTTAGTATTTATTATTTTTATTATCCTTCTCTGGTTAAGGTGTCGATTGCGCTGC  
TAACAGCGACTCAATCCCACTAGATTTGCTCGCTGTTTGGCCTACCCGATCGCGACTCCAGGTACTTGAGGTTTGT  
ATTGTGATTCTAAAAGGTGACTCACCACAATGATTTTACAGAGAGATGCCGACGCGCTGCGATCTGATGAAC  
CTGTTCTTTGTGATCGACGAGCATTGACACACATGGCGAGGAGACAGTACGCAAGATGAAGGACGTAGTCATG  
GACGCCATCAGAAATCCCAAGCCCGTCCAATGACGAGTGGATTGGAGGCGAAATTGCACGACAGTTCGTC  
GAGACTTTATCTATGCTCAACAATGACTGACTGATTCTTATTTTATCTATTTCTTTTACTTAGATTCTGGGAACGTG  
CAATGTGTTATGCTAGTGAGATCTCCAGCGACGCTTCATCGACACCTTCGATGAATACTTGAATCCGTCGTAGA  
CCAGGCCGACAGAGGACAGTGCAAGGATCCGTGATATCGAGAGCTACATTAACATTCGTGCGCAACTATCGG  
AGCGAAGCCCTCGTTCGTCATCATGGAGCAAGGCATGGACATCCCGGACAACGTCTTCGAGAACGAGGTGTTTCA  
GAGACTTCGATGGCCACGATAGACATGCTTTGCCCTGGAAATGTCAGTATCTATCCCTAAATTTTATGTGACCCA  
GCTCTTGACTTTGCTATTTCTCTAATACTCTTTGTCTTACTAGGACATCGTATCATAACAATTGAACAAGCTCGAG  
GTGATGACTCCATAACATCGTGAGAATTGTCATGAACGAGCTCGATAACCGATGTCCCTCGCGCTATGGATTGGGT  
AGCTCAGAGACATACGCAACTCGAGCGGAGTTCCTCACCGCGCTGAGCGAGCTGCCACTTGGGGAGAGCCGAT  
CGATGGATGGGTGAAGGAGTATGTCTATGGTCTGGGGAACTGGGTGCGCGCTAACGACCAGTGGAGTTTTCGAGA  
GCCAAAGTATTTTGAACCAAGGCATGGAGATCATGAAGTCAAGGTGGCTTTTGGTTTTGCCAAGGTCCGCC  
CTGCTGAGGTGCGTCCACAACCTGTTGAC  
CAATCTCTTATGA

>Stehi73029

ATGGCTGTCGCTACCTCTGTTGCCACTCCTGTTTCTACTCCGCTACTCTGCTGGCCGCGCTCCGGCCAAAGAGAA  
GAAGATCTATCTTCCGACACACTCGCTGAGTGGCCTTGGCCTCGCGCCATCAACCCTACTATGCTGAAGCGAAG  
GAAGAGTCTAAGCATGGGCCGCAAGTTTCAATGCTTTCAGCCGAAGGCTCAGCACGCCTTCAACCGCTGCGACT  
TCAGTAAGTCTTTCATAAATTTCCGCAGCTTATTCTTCGCTATTTGCTTACTGTCTACGTTTTTGTTCGCGCTTTTGC  
TCAGACCTTCTTGCATCCCTCGCTTACCCGCTCGCCACTAAACGTATGATTGCTGTCTTACCCTCGGTGATTATAC  
AGTAGGACACTAGTATTTACCCAGATTTTTCTCCCAAGATGGATGCCGCTCAGGCTGTGATCTCATGAACCTTTCT  
TTGTCATCGACGAGTACTCTGATATCGCTCCCGTCGAGGAGTCCGCCAGCAAAAAGGACATCGTCATGGACGCTCT  
CCGGAACCCACACAAACCAGTCCCGAGGGTGAATGGGTGGGCGGTGAAGTCGCACGGCAGTATGTCTCCCTATT  
TCTTCTTCTCGCGTGCTCCAGTTATCCTGTCTTCTCCTTCTTGTATTATTATCGTTTGTCTTTCATGATCCCGGCC  
ATGCTCATCACTCATTTTTATTTTTAGATTCTGGGCTCTGACCATACCAACGCTAGCGCTCAGTCGAGAAGCACTT  
CATCGAGACTTTTCGACGAGTACCTCGACTCCGTTGTTTCAGCAGGCTGAAGACAGGTCAGAGTCACGGATCCGCGA  
CATTAGAGTTATATCGACGTCGCGCCGCAACACAATTGGTGCCAAGCCATCATTTGCCCTCCTCGAGCTCGATATG  
GACCTTCCCGACGAGTTCGCCCCATCCCACTATCCAATCACTTCCCTGCCACCATCGACATGCTTTGTCTTGGC  
AACGTAAGTAACAATGCTGAGATACTCTGCACTACCGTGCTAACCCGATGTTCTTGCTTAATAGGACATTGTCTCG  
TATAACCTCGAGCAAGCTCGTGGTGTGCCAGCCACAACATCATCACCATCGTCATGAACGAGCTCAACCTCGACG  
TCAACGGTGCCATGCGATGGGTAGGCGACTTCCACAAGCAGTTGGAGAAGCAATTCTTCGAGGCGTTCAACAACC





TCCCGAGAACGACGATACCTCCAAATTGTCTAAAATCAGTAAAGAGTGAGTCCTATTCCGCGGAGAGTACTTTAGC  
TTCCGTTAGACTAATGTGCATGTTTACAGATTCCGAGCGCGTTATTTCAAACGTGCAGGCCCTAGAACGGCTGAAC  
GTTTCCTCCAACATTGTCAAGACTACATTGACTGTGTACGCGAGAGGCTGAGCTTCGTGAACGTGGAGAGGTCCT  
CGATCTTCCTTCTTTTACCGCCCTGCGTCGCGAGAACAGTGCCATTAGGATTTGCTTCTGTCTTTTGAATATGCCCT  
AGGTTTTGATCTTCCCAAGAGGTATTTGATGATCCGACGTTTCATGGAGATGTACTGGGCTGCTGCGGACCTCGTC  
TGCTGGGCAAATGTAAGTAATGTCTACATTTCTAATCGTCTTTGATTGATGTGGCCTAACGGCTTCGTCAGGACGTC  
TATTCTTACAACAAGGAACAAGCACAAAGGACACGGTGGGAACAACATTGTCACTGTTCTCATGAAAGCGAAGGAT  
CTTGATTTGCAGGCTGCCTGTGACTACATCGGTGTGTACTGTGAGGAGTTGATGGGGCGTTATTTATCTGCCAAAG  
CCCGTTTACCTTCTTGGGGCCCTGAAGTTGATGCTGCTGTTGCACAGTATGTAGAAGCTTCAGGTCAGTGGGTGCG  
AGGGAATCTTGAGTGAGTGTCTTTCTTTCTTCTGCTACTGATACTGATTCCACTTCGTAGTTGGAGCTTTGAGACA  
CAGAGTACTTTGGTGCTCAGCATGCTGAGATCAAGGAAACACGTCTCGTCACTTTAACGCCAGCAATCCCGAGG  
ACTTTAGTGACACAGGATCTGAGAGCGAGTGA

>Omp5a

ATGTCTCCTGATCCTACCCGCATTGTTCTTCTGACTTCTTGGCCGTTGTCCGTTTCGAAAGCTCTACGAAAAACCT  
CACTTCAAAGCGGCAGGCGCAGAATCGTCGGCGTGGGTCAACAGTCATGTTGTATTCAACGACCCGAAACGCGCT  
GCCTTCATGCAAGACATCTATGAACTTCTCGTAGCCTACGCGTCCCCTGGGCAGATTATGAAGATTTTGAACAAT  
GTGCGACTTTGTACGTCTTCCACTTTTGTTCCTCGCTGTCCCTTGTCAATGATGTTATCTTAGATCAACCTTCTCTT  
CGTCTCGACGAACTCAGCGACGATCAGAATGGTAAAGACGCTGGTTACACTGGCAAACCTTTTCATGGATGCCAT  
GCGAAATATCGACAATGGTGATACCTCCGAATTGACTGAACTTTGCAGAGAGTGAGTCTTATTTCCGCGAAGGGA  
CTTTTTTTTACTTTTCGTCAGACTAATGACGAGATTTACAGATTCAAAGCGCGTTATAGTAAACGTGTAAGTCCTCA  
AGTGAATGAGCGCTTCCCTCAGCATTGCAAAGCTACACCGACTGTGTGCGCAAGAGGCTGACCTTCGTGAACGC  
GGAGAGATCCTCGATCTTGAATCTTATGTCGCCCTTCGTCGCGAGAACAGCGCTATCAGACCTTGCTTCGATCTGG  
TCGAATATATCATAGATTTTATGATTTCCCAAGAGGTGATTGATCATCCAGTATTCTCGGAGATGTACTGGGCCTCT  
GTTGACCTCGTTTGTGGTCCAATccccccccccccccccccccccccccccccccccccccccccccccccccccccccGACGTTTATTC  
TTATAACGTGGAACAAGCGAAAGGACACGGCGGAAGCAATGTGGTCACTGTTCTCATGAAGGAGAAGAATCTTG  
ATTTGCAGGCTGCATGCGACTACGTCGGTGTATACTACGAGGAGTTGATGGATCGTTACTTGTCTGCCAAAGCCCC  
TCTACCTTCTTGGGGTCTGAAATTGATGCAGCTGTTGGGAAGTATATATTGGCTGAAGCTCAATTCGTGAGAGGA  
AATCTTGAGTACGCGTTTCTTTCTTTCTTTTCTGTTTTTTTTCTGATCTGATACTTATCCTACTCTGTAGTTGGAGC  
TTTGACTCTCCGAGGACTTTGGTCTCAGCATGATCAGGTCAAGAAGACGGGTATCGTCACTCTGACGCCAGCTC  
CCAAGAAGTTTGGCAGTGACAGTGGATCCGAGAGTGAGTGA

>Omp5b

ATGTCTCCTGCTCCTAGCCGATTGTCCTTCTGACTTCTTTGCCTCTTGTCCGTTTCGAAAGCTCTACGATAAACCT  
CACTTCAAAGCTGCAGGCGCAGAATCGTCGGCGTGGGTCAACAGTCATGTTGTATTCAACGACCCGAAACGCGCT  
GCCCTCATGCAAAACAGCTATGAACTTCTCGTAGCCTACGCGTCCCCTGGGCAAGTTATGAAGATTTCCGAACATT  
GTGCGACTTTGTACGTCTTCCACCTTTGTTCCTCGCTGTCCCTTGTCAATGATGTTATCTTAGATCAACCTTCTCTT  
CGTCTTTGATGAAGTCAGTGATGATCAGAATGGTAAAGACGCTGGTTACACTAGCAAGATTTTCATGGATGCCATG  
CGAAATATCGACAACGGTGATCACTCCGAATTGACTGAACTTTGCAAAGAGTGAGTCTTATTTCCGCGAAGGGAC  
TTTTTTTTTTTACTTTTTCGTCAGACTAATGACGAGATTTACAGATTCAAAGCGCGATTTAGTAGACGTTTAAAGTCT  
CAAGTGAATGAACGCTTCTCCAGCATTGCAAAGCTACACCGACTGTGTGCGCAAGAGGCTGACCTTCGTGAAC  
GCGGAGAGATTCTCGATCTTGAATCTTATGTCATTCTTCCGCGGAGAACAGCGCTGTTAGACCTTGCTTCGATCTG  
GTCGAATATATCATGGATTTGATATTCCCAAGAGGTGCTCGATCATCCCGTATTCTCGGAGATGTACTGGGCCTC  
TGTTGACCTCGTTTGTGGTCCAATGTAAGCAATGTCTACCTCTAGTTTTCTTTGACCCTAACGGTGTAAATCAATC  
AGGACGTTTATTCTTATAACGTGGAACAAGCGAAAGGACACCGGGGAGCAATGTGGTCACTGTCTCATGAATG  
AGAAGAATCTCGATTTGCAGGCTGCATGCGACTACGTCGGTGTATACTACCAGGAGCTGATGGATCGTTACTTGT  
TGCCAAAGCCCGTACCTTCTTGGGGTCTGAAATTGATGCAGCTGTTGGGAAGTATGATTGGCTGAAGCTCAA  
TTCGTGAGAGGAAATCTTGAGTACGTTCTTATTTTCTTTTTTTTTTGTGATCTGATACTTATTACCTCTGTAGTTGG

AGCTTTGACACTCCGAGGTACTTTGGTCCTCAGCGTGATCAGATCAAGAAGTCGCGTATCGTCACTTTGACGCCAG  
CTCCTAAGAAGTTTGGCAGTGACAGTGGATCCGAGA

>Omp6

ATGATTGCAAAGAACTCCGAAATCGATAGGTTTTACATCCCTGATACCCTTGCTAACTGGCCATGGCCCCGTACCT  
CAACCCAGCTTATCCTGAAGCGAAAAAGGCCTCTGCTGCCTGGCTCAGAAGCTTCAACGCTTTCAATGAGAGATCT  
CAGAAAGCATTTCGATTTGTGCGACTTCAGTAAGTGTGTGCTTCATACTCAAAGACTGAATTCAGCGTACTGACCG  
AGACGTACAAAGACCTTCTGCTTCCCTGGCCTTCCCTCTTGCCGATCTCTATTGTCTGCGTTCAGGATGTGATCTCA  
TGAAGTGTTCCTCATCTTCGACGAGTACTCGGACGTTGCTGACCCCAAACCGTGCGTCAACAAGCCGACATAATT  
ATGGATGCGATTTCGTAACCCCTCACGTCCCACGCCGAGAGGCGAATTCATAGGCGGTGAGGCTCATAGACAGTAG  
GTTTCCACCAAGCCCTCTCTTCGTGTTCCACTGAAAATACTTTATTGGAATAGTTCTGGAACGTGCCATGCAGG  
GCGCTACCCCCACGGCTCAACGCCGTTTCATCGACACTTATCAGCAGTACACGGACGCTGTTGTTGAGCAAGCTAC  
CGACAGAGCCGACAACACATACGTGATGTTGAAGGCTACTTCACCGTTCGCCGCGATACTATCGGTGCCAAGCCT  
TCATTCATTTGCTCGAGTTCACCATGGACATTCCAGATGAGGTCATGGGACACCCCGTCATCAAAGATCTCTCTCT  
TTGGTGCATCGACATGCTCATCATCGGTAATGTAAGCCCTTTCACATCATCTTGACCCTCAAAAAGCGCCGTTTTTCT  
CAAAATTCATTAGGACCTATGCTCATAACAACGTGAGCAAGCACACGGAGACGACCTCCATAACCTGGTCACTAT  
CGTCATGAACCAGTACAACCTCGATCTCCAGGCCAATGGAATGGATTGGCAAATTCACGACGACATAGCCGA  
TAAATTCCTCGACACATTCGCGAAACTCCCAAGCTGGGGCCAGAAATTGACCCTCAGATCCGTCGTTATGTTGAC  
GGACTCGGAAACTGGGTGCGCGGGAATGATTCTTGAGCTTCGAGAGCTGGAGGTAATCCGTTGGCAAAGGCC  
CGAAATCGAGAAAACCTGTTGGGTGGACCTCATGCCGACGGAAGAGGCGACTATTACCCGAAATATGAATCAGA  
TTCGAACGCAGCTCAACCCGCTCAAAGTACTTAA

>Omp7

ATGCCGGAAAACCTTCTACCTGCCCGATTGTTTGGCGAACTGGAAATGGAAGCGTGCCTCAATCCTAATTACCCTG  
AGGTGAAAGCAGCTTCTCTGAGTGGCTGAGGAGCTTCAAAGCTTCCCTCCCAAAGCCAGGAGGCTTATGACC  
GATGCGATTTAGTAAGTCGTTTGCATTGGTCGTTTGTGGTGAAGCTCGACAACCATCGGTATTTTTAGATCTC  
TCGCATCCTTAGCGTATCCTCTGGCAGACAAAGGTGAGAGTGTAGCCGTGTCTGCGAAAACGGTAGACTGCAGCTT  
ACTGTTATTGCAACACAGATGGGCTCCGCACCGGATGCGACCTCATGAACATGTTTTTTCGATTTCGACGAATACTC  
GGACGTTGCACACGAATCAGAAGTGCAGGTCCAAGCAGACATCATTATGGACGCTCTGCGTAACCCCTCACAAACC  
CCGACCTGTGCGAGAATGGGTTGGCGGCGAAGTGAAGTACTAGACAGTAAGTGTGTTTTCGAAAAGTCGTGTACCGC  
CAGTTCTACCCGACATAAAGATTTTGGGAGCTCGCCATCAAACCTGCTAGCCCGCAATCACAGAAAACGTTTCATCG  
AGACTTTCGACACGTACACCAAATCCGTTGTCCAGCAGGCAGCTGATCGTACACAGCACTATGTGAGGACCGTGG  
ATGAGTATCTTGAAGTTCGACGGGACACCATCGGAGCCAAGCCGTCATTGCAATTCTGGAGCTCACCATGGACAT  
TCCTGACGAAGTCATCCACCATCCGACAATCGAGAGACTGGCAATACTTGCCATCGACATGATTCTGTTAGGAAAT  
GTAAGTTCCTGCTACGCAAAAAGAATGATGCTCACCAGGAAATCTCATTGCAGGACACCGCTTCATATAATTAT  
GAACAAGCTCGTGGTGCAGACAACCAACATGGTGACAATTGTCATGCACCAATACAAGACCGACATTACGGGC  
GCTTTGAGCTGGATCGAGAAATACCACAAGGAGCTTGAAGAAGAATTCATGCAGCTCTACAACAGCCTCCCAAG  
TGGGGTGGTCAAATCGACGTGGATATCGCGCGTTATGTGGATGTTTTGGGCAACTGGGTGAGGGCTAGTGACCA  
ATGGGGCTTTGAGAGCGAACGGTACTTTGGCACGAAAGCTCCGGAATTCAGAAGACCAGATGGGTGACGCTCA  
TGCCCAAGAAGCGTGCCGAAGGTGTCGGTCCCGAGATCGTTGATATTTCTGAGCTCTAG

>Cop1

ATGTCTTCGCTTGACGCAACCATCCACCCGTTTTGAACTTCGAGGACAAGAAGATTGCTCTTCCCGACCTCGTCTC  
CCACTGCAACTTCAAGCTTCGCGTCAGTCGACACCGAAAACGAATTAAGGCGAGACCAAACGCTGGTTGTTCAAG  
GGCGACAATCTTGTGCGCCCTGCGCGAAACAAGTACCATGGATTGAAAGCTGGCCTCCTACCGCCATGACTTACC  
CTGATGCTGCATACCCCAATTGCGTCTTTGCAACGACTTCTCACATATCTGTTCCATATTGACAACCTCTCGGACG  
ATATGGACAACCGAGGGACGTGGAGCACTGCGAATGAAGTTCTTAACAGCCTCTATCATCCCTACACCTATCATGG  
CCAAGCGCGAGTTGGGAGGATGACCAGAGAGTGAGTCTTTGTGACTCTTATTTACCCGTTTCTATGCTAATCGAT

GCCTTCCATTCTACGATATGAACAGTTACTGGAGGCGGATGATTCTTACCGCTCACCCGGCTCTCAACAACGTTTC  
ATCGAGACGTTTGACTTTTTCTTCCAAAGTGTACACAACAAGCGATTGATCGCTTGACCGGAGAGATACCTGACC  
TGGAGTCTACATCGCCCTTGAAGGGATACCTCTGGATGCAAGCCATGCTGGGCCTTGATAGAATGTAATTTTTTC  
TTGTCTTCCATCGTTATGTCACGCTTTGCTGACTGTTTGACATGTTAGACGCCAACAATCTTGATCTTCCGGACGAG  
GTCATGGACCACCTGTTGTCCGTAGTCTTGGAGAGGCCGCAATGATCTTGTGACGTGGTCCAACGTACGTGAAT  
TACTGATACGACTATCTCGCTTCTTCCGTGATGCTTATTCTTTCAATTCAGGATATCTTTTCTTCAATGTGCAACA  
GTCCAAAGGCGATACGCATAACATGATCCCTGTGGTGATGCATCAAGAAGGCTTGGATCTTCAAGTACGTGTCGA  
CTTTGTTGGCGAAATGTGTAAGTCAGCAATTGACAGGTTTCATCGAAGACCAAACTACCTGCCTTCTTGGGGTCTC  
AAAATCGACCGGGACCTGGCTGTCTACATCAATGGACTTGCAGACTGGATCGTTGGGTCACTACACTGGTCTTCC  
AAACCGAGCGATACTTTGGCAAGAATGGACGACAGGTCAAGTCGAGTCGAGTAATTGATTTGCTCCCTCGACGAT  
CACAGTAG

>Cop2

ATGCCAAGTCCCGCGGGAGCGCTTCCCAAGTCCTTCATACTTCCCGACCTGGTCAACGACTGCCATTCCCCCTTCG  
AGTCAACCCACTCTGCGACGAGGTTGGGAGACTATCCGAGCAATGGTCCCTCCGCCATGCAAATTATTCGCCCCCT  
CGGGCAGTGGCGTTTATGGCACTCAAAGCGGGCGAGCTCACTGCTGCATGCTACCCAGATGCCGATGCCTTCCAT  
CTCCGAGTCAGCGACGACTTCATGAACCTCCTCTTCAATGCCGACGATTGGCTAGACGACTTCGACATTGAGGACA  
CGTACGGGCTGGCCAATTGTAAGTTCGAGCCCTGCGCGACCCAGTCAACTTCATTACTGATAAACGCGCAGGACT  
AATGACGAAATCGTGAGTCGTTTTCATTTTAATTCACCGTCGAGACTCGAGCTTCCGTAGATATTTTTCTCGATT  
CTGAAGACCGCTGGGCCTCGCTGTACAGAGCGCTTTATCCAACGTTGGCGCTCTACTTTGAATCAGTAGTAACGC  
AAAAGCAAGCTCGTAACAATGGCACTTTGCCGATTTAGAGAGCTACATCACCATTGAAGGAATAACAGCGGCT  
GTAAACCTTGTTATGCACTCATCGAGTCTGTGCTGGCATTGATTTGCCGGACGAGGTTATCAATCACCATTATT  
CAATCGCTCGAAGATGCTTCGAATGACCTATTGCTTGGTGAACGTAAGTGTCTTTCGATGGTCTTGGATCGTT  
CCTTACTGCTTGGTATTATTGATTGTGCTCACCCATTGTACCAGGATATCTTCTTTCAACAGGGAGCAATCTCGCC  
ACGACAGCTTCAACATGGTTTCCATCGTTATGCACCAGAAGGGCTTTGCGCTTCAGGAAGCTGTCAACTTTGTTGG  
AGAGCTTTGTAAAAAGGCGATGGAACGTTTTAGGGCGGATAAGAGGAATCTCCCTTCATGGGGTCCAGAGATTGA  
CGGGGAGGTCGCAATGTATGTTGATGGGCTGCAGAATTGGATAGTCGGTATGTTTCTACGACCAGACTTACGTGCG  
TTGGCGGAAGGATATATACTTACCATTGAGCGATAGGGTCTCTAAATTGGTCCATCGACGGGACAGAGCGCTATTT  
CGGCAAAGACGGGCCTGGAATAAAGAAGCATAGAAAAGTCAAGCTATTCCCCAAGCGCCATTGAAAACACCTGC  
TGTGCGGGTTTTGGCCTAA

>Cop3

ATGTCGACGCCCTCGTCTTCTCTCACCCTGATGAGAGCCCCGCATCCTTCATCCTCCCTGATCTCGTCTCACACTGT  
CCTTTCCCCCTCCGATACCATCCCAAGGGAGATGAAGTGGCCAAGCAAACCGTCCATTGGTTGGACAGCAACTGTC  
CCGACTTGACTGCGAAGGAACGAAAGGCGATGTATGGACTCCAAGCAGGCGAGCTCACAGGGTATTGCTACCCCT  
ACACCACCCCGAGCGACTACGCGTCGTCGCCGACTTTTTGAACTATCTTCCATCTGTACGTTCTCCACCTCTCT  
TGTCGATTTGCGTCTCACTAACTTTGACTTTCAAACGCAGTGATAACATTAGCGATGGCATGATGACACGCGAGAC  
GGCCGTGTTGGCCGACGTTGTCATGAACGCTCTTTGGTTCCCGAAGACTACAGACCAACCAAGGGCCAGGCTGC  
GGAAGAGCTCAACCCTGGAAGCTTGCCAGAGAGTGCCTACTGTCCAACCAAAGAACGAATCGCCCCGAACTC  
TCCATTACCATTACAGTTTTTGGTACGGTGTATTCCAGATTGCGGACCTGGAACGCAAGCTCGTTTCAAGGAGA  
CTTTTGGGTCTTTCTTTGAAGCTGTCAATATTCAAGCACGCGCTCGTGATGAGGGTGTATCCCGATCTAGAGTCC  
TATATCGATGTCAGGCGGGATACTTCAGGTGAGTTCAGCGTTTGCTTTACCATCCATATCATATACCCATACTACCC  
CCATCTGACACTATAACCTTGTGTCCCTGCCCTGACCTGTGTTGACCTGTCAATCAATTAAGTGAACATGTATTGATT  
TCATTGTCCGTTTACAGGTTGTAAGCCTTGTGGGTGCTCATTGAGTGGGTTTAACTTTTTCATCTGCGTTCCGTTCC  
TGAGCGTCTATGGTGGCTAATACGTTTTACCGTTATCACTTTAGGTATGCGCTGGGCATCGACCTCCCTGACTTTGT  
GGTTGAGCATCCTGTTATCGCCGCTTGAACCAAGGCACCAATGATCTCGTAACTTGGTGAACGTCGAGTTGTAGT  
TCCTCCCTTCCGCTGGCTAACCTGCGCCGCTCCACCTGGTATCTAACGAAAACGGCGTTAGGATATCTTCTCTAC  
AACGTTGAACAATCTAAAGGCGACACTCACAACATGATCATAATTCTGATGGAACACCATGGCCATACCCCTCCAGA

GCGCCGTCGACTACGTCGGATCCCTCTGTCAACAGACCATCAACACCTTTTGGCAGAACAACAACAGCTCCCATC  
ATGGGGACCTGAAATCGACGACATGGTCGCAAAATACGTTCAAGGCTAGAGGATTGGATTGTTGGGTGAGTATT  
GTTCAAGTTCTGGCCCGTCTAGCACCTGCGGAGTGTGCGTATCGGGTCCGCATTGAATACGCATTAACCCGTT  
TGGTCCAGGTCACTTCACTGGAGTTTCCAGACGCGTCGATATTTGGAGATGAAGGCCAAGAAATCAAGCAGCAC  
CGTTTGGTTAAACTGTTGACTGTTGCCCTCCACCGCCGCCACCACCTCCGACACCGCCCCGCAATCCTCCGACGC  
GGACACCAAGAAGCAAAAGGTCAAGGCACAGGACGGGAAGGGTCCCGTTTCGGATGAAGAGGTTTGGGCGCTT  
GTTAGGGCCGAGCAGTCAAAGGATCTATCCTCGAGTCACTATTCCGATTCTAACGACATCTCTGTACGCATCTT  
CTTGGCTATTTCTTGCCTATTCGCATTA

>Cop4

ATGCGTCCAACCTGCCCCCAATCACTCTCCCCGACTTGTTTTCCATCTGTCCCTCCAGGACGCGACCAATCCCTG  
GTATAAACAAGCGGCTGCTGAGTCTCGCGCATGGATCAATAGCTACAACATCTTACCGACCGCAAACGCGCCTTC  
TTCATCAAGGCTCAAACGAACCTCTGTGCTCGCATGTTTACGCATACGCCGGCTACGAGCAATTCAGAACCTGCT  
GCGACTTCGTGAGTTCGTTGTCCTTGATATGATGTTCCGGCCTTATCATAACGTCAGGTCAACCTACTGTTGTCGT  
CGATGAAATCAGTGACGACCAGAACGGCCAGGATGCACGGCCACAGGTCGGATATTCGTCAACGCTATGAGGG  
ATGCACACTGGGACGACGGTTCATCCTTGCCAAAATCACACATGAGTCCGTTATTTTCGTCAATCCGCCATTACAT  
CTTACTCACTTCTCGTAAATCAGATTCGCGAGCGCTTCGTCGCTTGGCTGGTCCGAAAACCGTTCGACGATTTGC  
TGACCTTTCGAGAGCTACACCGATTGCGTTGCCGAGAAGCGGAACTGCGCGAACGGAATCAAGTCTCGGATT  
GAACGATTTTCATCGCCCTTCGCCGACAAAACAGCGCAGTTCTACTTTGCTACTCCCTCGTCAATACATTCTGGGGA  
TCGACCTTGACGATGAGGTCTACGAAGACCCTACCTTTGCCAAGGCGTACTGGGCTGCTTGTGATTTTGTGTGTTG  
GGCAAACGTGAGTGTTCCTCCCTTGGTTCGGCCTTACAATTGGCTCATTTCGATTGCAATAGGACGTCTACTCTT  
ATGACATGGAACAAGCGAAAGGCCATACGGGCAATAACGTCGTCACGGTGCTGATGAAGGAGAAGGATCTCAGC  
TTGCAAGAAGCATCAGATTACATTGGGCGAGAATGCGAAAAACAATGCGCGACTACCTGGAGGCCAAGTCTCAA  
CTACTACAATCCACCGACCTGCCGCAAGAAGCTGTTGATACATCGAAGCTCTGGGTTACTGGATGGTCGGAACCC  
TAGTGTATGTCATTTCTCTCCCTTCCAACCCAGGTCGTTTTGACTCATGGAACCTCCTTCAGATGGAGCTTCAAT  
CCCAACGATACTTCGGTGCTCAACATGAACGGGTGAAGGCGACGCACGTCGTGCACCTTCGACCAAGCAGCGTTC  
TCGAAGCATCATGCGATTCCGACTCTGACAGCGACTGTTGA

>FomPi84944

ATGTCTCGACGGTACCAGACATCCCGCTTCTCGCGTCGGCGAAAGGAAAGAAGACGAGCCTATACTTACCG  
GGGGATCTCAGGGCGCTGTTCCACCGCTTCTCGCTCTATGCTGGCGTCCAGGTATGTTACACGCCCTGATATCTCT  
CCTACCAAACAGACTAACGGCTGATTGGGTGCGCCCCATTTGTAATGTATGTTCTGGAACCGTCATTCACGAAGG  
CCTACATCGATATCCCGCTCTATGGTGTGCAAGTTCTCGGTGTGTACGACCTCAATTGGCTCGGCTCACTCGAA  
GGGTCCGAGGCCCTCGGGTCCATAACCAATAGGATACCGCTGGTGTGAGTTATCTTCCGCTGTTAACATAACCTCCG  
AGTAATACTCAGCTGGTCTTCCATCATTTGTAAGTGCAGACCCGTCAGCACAGGCATGTTACTACAGTCCCT  
GGCACATATAAACCCGCGAGACATCATACAAGCATCAAGAGCTGGATATTGACGCGCCGAGAGGTCAGCACTCA  
GCTCCCCACAGACCGAATGCTCGCTCATGAATCTGCTCTACTAGCTAGAATCATTACGCTCTCAAAGATGATGCAA  
ATTGAAGTGCCAGTTATGCTCAACCTCAAGGAGTCGAGTATGCCATGAACAGTACTGTGGTACGGAGGTCGCGA  
TGTTCCGACTCAGCTACTTGCTCATATGTTCCCTCAGCTTGAGGACTGTACAGCGGCAGTAGCGAAGGATGCTATAG  
TCCAGTTCTCCGGAGACTGGGCGCTGTGCTGCGTCCATCGTTTGGCAACAACCGCGACCTCGAAGAGCGCGTGA  
AGGAAATCACAAGACGTGGCCTTTGCAACACCGCATCCACCCGCACATCACTACTGGAGTGGTCATGGCAAACA  
CCACAATTGCATATCTCTCAGACCTTGATGCACGGGCAGCGTTGCGGCCTATACCGCGCTCATCACGGCGCTCGA  
CGACCCAGATATCTTCCACGCATCCGGCGCCAGAACTTCGCCAGATGCTGTGCGACGGATCTGCCCTTCGTGAC  
GACGGGGTCTGGGGCAATGGCCAGGGTCTCGCGACATGGGGAACCATTTCCCTCCCTTCGGCAGGAGTGCC  
ATCATCGCTGCGACTCTGCGGTGGTGAACGGCGAGCTTATCAGCAACCCGGCCAACCCGTTCTGCCTCAGGCCGC  
TGTCGAAGGCTTTTGTGATTACCAACGAGGTCTGACCGCGTCCCGGAGGCTTATGCGGCGTTTGGCTGGTGA  
AGGCAGACTTCCAGTCGAAACCGATTATCCACGTCTTCCGTAAGTGGTCCGTCAGACCTTTGTGCTGTACTG  
TATCTGAGCTCTGGCCTACAGAGACATTTGTTTCTTCTGAACCAACCAAGTGAAGTGGACTGGACTCATACGCGC

GTGCTGTGATCATGTTTGCTCATGCGGGCCATAGCGACATCTTGTCATTCTACAAGGAAACCCTCGACGGCGAAAG  
CGATAGTTACATCCATGCCCCTGCTCGCCTCACGGGCAAATCCGTCACTGACACCCTCTACGAGGTCATGGACGAA  
GTCATCACTACGACTGAACGGATACGGAACATTTGCGCGAGGGCCGCATGAGGAATGCGTGGGACAGGTATGA  
AGCTGGGTACGTCTGGTTCCATACGGGTAACCCTAGGTACCGCCTCCACGAGCTGGTTGACACAGAGTATATGCCT  
ATGTACTAG

>Cop3

ATGTCGACGCCCTCGTCTTCTCACCCTGATGAGAGCCCCGCATCCTTCATCCTCCCTGATCTCGTCTCACACTGT  
CCTTTCCCCCTCCGATACCATCCCAAGGGAGATGAAGTGGCCAAGCAAACCGTCCATTGGTTGGACAGCAACTGTC  
CCGACTTGACTGCGAAGGAACGAAAGGCGATGTATGGACTCCAAGCAGGCGAGCTCACAGGGTATTGCTACCCCT  
ACACCACCCCCGAGCGACTACGCGTCGTCGCCGACTTTTTGAACTATCTCTTCCATCTGTACGTTCTCCACCTCTCT  
TGTCGATTTGCGTCTCACTAACTTTGACTTTCAAACGCAGTGATAACATTAGCGATGGCATGATGACACGCGAGAC  
GGCCGTGTTGGCCGACGTTGTCATGAACGCTCTTTGGTTCCCGAAGACTACAGACCAACCAAGGGCCAGGCTGC  
GGAAGAGCTCAACCCTGGAAAGCTTGCCAGAGAGTGCCTACTGTCCAACCCAAAGAACGAATCGCCCCGAACTC  
TCCATTACCATTACAGTTTTTGGTACGGTGTATTCCAGATTGCGGACCTGGAACGCAAGCTCGTTTCAAGGAGA  
CTTTTGGGTCTTTCTTTGAAGCTGTCAATATCAAGCACGCGCTCGTGATGAGGGTGTATCCCGATCTAGAGTCC  
TATATCGATGTCAGGCGGGATACTTCAGGTGAGTTCAGCGTTTGCTTTACCATCCATATCATATACCCATACTACCC  
CCATCTGACACTATAACCCTTGTGTCCCTGCCCTGACCTGTGTTGACCTGTCAATCAATTAAGTGAACATGTATTGATT  
TCATTGTCCGTTTACAGGTTGTAAGCCTTGTGGGTGCTCATTGAGTGGGTTTAACTTTTTCATCTGCGTTCCGTTCC  
TGAGCGTCTATGGTGGCTAATACGTTTTACCGTTATCACTTTAGGTATGCGCTGGGCATCGACCTCCCTGACTTTGT  
GGTTGAGCATCCTGTTATCGCCGCGTTGAACCAAGGCACCAATGATCTCGTAACTTGGTCGAACGTGAGTTGTAGT  
TCCTCCCTTCCGCTGGCTAACCTGCGCCGCGTCCACCTGGTATCTAACGAAAACGGCGTTAGGATATCTTCTCCTAC  
AACGTTGAACAATCTAAAGGCGACACTACAACATGATCATAATTCTGATGGAACACCATGGCCATACCCTCCAGA  
GCGCCGTCGACTACGTCGGATCCCTCTGTCAACAGACCATCAACACCTTTTGCAGAAACAACAACAGCTCCCATC  
ATGGGGACCTGAAATCGACGACATGGTCGCAAAATACGTTTCAGGGTCTAGAGGATTGGATTGTTGGGTGAGTATT  
GTTTCAGGTTCTGGCCGCTCTAGCACCTGCGGAGTGTGCGGTATCGGGTCCGCATTGAATACGCATTAACCCGTT  
TGGTCCAGGTCACCTCACTGGAGTTTCCAGACGCGTCGATATTTTGGAGATGAAGGCCAAGAAATCAAGCAGCAC  
CGTTTGGTTAAACTGTTGACTGTTGCCCTCCACCGCCGCCACCACCTCCGACACCCGCCCCGCAATCCTCCGACGC  
GGACACCAAGAAGCAAAAGGTCAAGGCACAGGACGGGAAGGGTCCCGTTTCGGATGAAGAGGTTTGGGCGCTT  
GTTAGGGCCGAGCAGTCAAAGGATCTATCCTCGAGTCACTATTCCGATTCTAACGACATCTCTGTACGCATCTT  
CTTTGGCTATTTCTTTGCCTATTCGCATTAA

>Cop6

ATGCCTGCAGCTTTGCCATACAACGTGTCCCGAGACAACAAGTGGGACATCAAGAAGATTATCCAAGACTTCTTCA  
AGCGCTGCGACGTTCCGTACCAGGTCATTCCATACGACACAGAGCTTTGGAATGCCTGCTTGAAGCGCGCGAAGG  
AGAAGGGCTATCCTGTCGAGCCCCGACAGCCCCATGAGTCTTTACAGGTCATTCAAAGTGGGGGTTGTTATCACAA  
GGACGTCTACGGCCACATCCAGGATTACGAGATCCTGATCTGGGTGGCAACATTCACCGCCTTCGTACCTACGC  
CGACGACGCTTTCCAGGAGGACATCAAACACCTCCACTCCTTTGCTAGAACTTTCCTCCAAAACGAGAAGCACGAG  
CACCCAGTCTCGAAGCCTTCGCCAGTTTCTCCGAGAGTCGTCCATCCGCTTCAGTCACTTCGTCGCCAACACCGT  
TGTCTCGTCGGCACTCCGCTTCATGATGAGCATCGCCCTGGAATTCGAGGGCCAGAATGTATCTGTGAGTGTGCT  
CCGTTACGTCTTTCTTAGATTCTCACGCTGACTTGTCTTTGAAGGTGTCTACAGAGGCTCGGAATATCCCGGATA  
CATTGCAATTCTGTCTGGTCTGTCCGACATCTACGCGCTGTTTGCTTTCCCTATGGACCTGCCCCGTTCCACGTACAT  
TCAGGTCGGTCTCGGCTACATGCCGCTACAGACGAGTAGCTAACCTCCGACTCGCACCTCTAGGCCTTCCCCGAG  
CAAATCGACTACATAAACGGAACCAAGTGAAGTGGCCAGCCCATATCCTCGACTTTTCTGACGCGTGTGCTTTGAT  
AGCGACCTCCTCTCGTTCTACAAGGAGGAGCTGGACTGCGAGACAGTCAACTTCATTTACGACGCTGCTACGTGCG  
AACAAGTCTCAAACCTCGAGGTAACGGAACGCAGCAGAGAAAGCAGCGTATTCGTACGACGTCGTCGTTAACG  
TTCTGAAACCTTATCCCGAGGCCCTGGCAGCGTGGAAAGAGCTTTGCGCGAGGGTTCTGCTACTTCCACACATCCTC

ACCACGTTACAGGCTGGGCGAGATGTTCCATGACTTTGAGCATGATTTGGTTTGCAAGTGTGCGAGCTGCACGGA  
GATTTAG

>Omp9

ATGTCGCAAATACTCCACCTCTTATGGTCAAAGTTTTGACAAGTCTGCCGTCCACTGTTACAATAGGTTCTGATCC  
CCAAACCCTACAGCTAGTCCATTACCGGTGAGTTCCCTTCACTATGCTTTTGTATCAACTCCAACGTTTCGAGTACAT  
GTACTAGGCTCCCAATGTCAACGCCAATGCTCTCGAAATATACAAGATTGTCGACAACCTTCTCTCCCGCTGCGGCA  
TTCGTCTCGAGAGTACGCCCTCGACGTCGAGTTCTACAACGAATGCAAGAAAACCTTTCTATCACACTACATTGGT  
ATCCACGACTCGACAAGGTATCAGAATCATGGTTCAAAGGTACCTTTCCGTAGGAGTGATCATAACCACAAATG  
CCTATGGCCACCTCGACAACAAGCTGACAAAGATCTACATCGCACTTTATACCGCGTTGGCAACTTGCTTCGACGA  
TGTTTTTGAGAAGAATGTCGATCACATGAGTGGATTCAATGAAAGGTTTCATGAAGGCGCTCCCGCAAGGGGACGT  
GTTTCTAGACGCATTTGCAAAAGTCTTGTTGGATGCTCCGAGATATTTTGGGCGGTTGGCTTCGAATATCATAGTTA  
CCTCCACATTGGACTTCATTACGTCTATGTCGGTGGACGTATTGACTAAGGGGATGAAGGTAAGCGTCCCTCGC  
TCCAGCGGTCCGTTCTACCTAGGTTGACGCGGACTATAAACGCCTAGTTCAATCAAATCTCCATAATTCGCCATG  
GCATGCAGGAATATGTCCGGAATTGCCTATACATATGCTCCTTTCATTTTCCAAAAGAGGTTCCCTTCGCTATCTAC  
GCTCAATGCCTTCTGACATGCGAATATACATCAACCATGTGAAGTGAGTCTACATGCATATTCAAGGGTCCCT  
GGCACATTGCACATCACTTACTGACTTTACTGAACACGTCAGTGATGTTTTATCGTTCTACAAAGAAGACAAAGCA  
GGGGAGACAGAGAACCTCGCCTCGATATTAGGGCAGGTACATCCTTCCATGACAAAATATCAAATCGTCCAAGGC  
CTCGCGACGATGCGGCTGAAGCTGATCTACGGTTCGTACGGTCTGTCTCAATATCAACCTGCGCTTGATGCGT  
ATAACTGTTTCCGACAAGGATACGTTTCGTTCCATGCATCGTCGGGTAGGTATAGACTGGATGAGCTCTTCTCGTTT  
GTTGAGCCCGAGCCAATCGTGTA

>Omp10

ATGACTCTTCTACTGAGCAAGTTGAGCTTTCCGGTGCATATAAGAAAGACTTTACTTTCAAATTTGCCCTGATACTT  
GAATTGAATTTAGGTCTGTCCGGTGGAGTCGAGTACGCACACCACTCGAGACATCATGCGGAATTTCTCTCTCAG  
TGCCAGATTCCCCTCCAGCGCGGCGTTCCTCTGGATCCTACGTTCCACCAAGAGTGTGCGAACGTCTTGATAGAGG  
ACTACCTCAAACCCAGCGCAGCAGTACTCTCGAAAACCTACCCTCGCTCATGTCGTCTTTCAACCCGTTTCTAACA  
TTGGGTGTGAGAATGGCTTCCACTGGATATGCTCATTGACTCATAACCTACCCGTGTATACGTCGCACTTTTAC  
CGCATTACTTGTGTCTCGACGATATATTTCCGAGAATGTCGAGCTCATGTGCGGTTTCAATGAACGTTTTCATCA  
AGAATGAAACACAGGGAGAGCCTATCCTCGATGCTGTTGCGGGTCTTTCGCGTTCGACATCGAAGTACTTTAGTAT  
GCTCAGCTCAAACCTGATCGTAACGTCTGCGCTCAACTATGTGACTTCGTTGTCTTTGACCAGGGCCTGCACTCTA  
TCAAGGCGAGTTTCTTTACGATTGTTTCAGTCGTAGTTTGTGAAGCTGAATGTGAGAACAAGTACTAGCTAGCGGAACATT  
CCAGGAATTTGCTCGTTTGTGAGAAACATGTCTGGAATTCCTGAGGCCTTTGCTGCGTTTGTGTTCCACCGGA  
GGTCCCATTCACTGCATACATCCAATGTTTCCAGATTTATACACTTACGCAAACCTACGTCAAGTAGGTGAAGGTAT  
CCTGTATCATCTCTCAGTCACTAATCAGATCAATCAGTGATGTCTTGTCAATTTACAAGGAAGATATAGCTGGAGAG  
ACGGAGAACCTCGTTTCCATCCTGGCTCAAACCTCAACCCAACTCATCGAGATACCAGGTCCTCCAGCAACTCGCTG  
ATGAAGCTGCTGCTGCAAATGCGAACATTCGAGATATTCTATCTGATCAAAGTCTATTTTGGATGCGTACGATGC  
TTTTCGTGTGCGGTTTGTGACGTTTTCATATAGACTCGCCTAGGTATAGGCTTGTGAACTGTTTCCATGTATTGATG  
GTTGA

>Stehi159379

ATGGAGTCGTCAGGGAACACATTCTCGCCTTCAGCACTTCTCGGCGAGATCGGCTATCGTCACACCACTCCTCC  
TGCACCGACGCTCGATTTTCTTTCATGCGCATCACCCTGGATACACCATGTAAGTGGGCCCATGACTTCATGGACG  
GTGGCCAACTAAACGCACTCGAAGACTCATCCTCGACCAATTTTCGAGAGAGCATAACCGTTGTCGACGCCGAGA  
TGAAGTTCGTCCTTGCAAAGCTCACGGCCATAGCCATTTTCTCGACGATTCTCTCGAAGATGAGGAGACCTATGA  
CGATATCGGCAACTTCGCACATCGTGTCTACCTGGGCGAGGCCAGCCGACCGGGTCTTACCCTCTACCACCAA  
GGCATTCAAGAGCTTTCAAGATGCACGAAGGCGACGCGGTCTTAGAGGCCTCGCTGTGCGACCTTGATTACCT  
TCATCGACGCCTGCATGTTAGAGAAGAGACTTCTGACCTTCGACTCGAAGCTACGCGTCAGTCTCGCGATCTGGG

ATATCAGCGCCTACGAAACAGCACAGATTTTACGTCCCTCCGAGCTCCGAAGGCTACTCCAAGTGAAGTAGAGGTT  
 AGCTTGTGAGTTTCCGAGTTTGCATGACATGCTGGTCTTGTGACTGACCTGATCTTTGTGCTCGCAGTCCTATCTTC  
 CTTCGCCACAAGAGTGGAATAGGAGAAGCCTATGCCGCTGCGATCTTCAAATCGTCTAGATACCAGGAGTTGCCCTC  
 TATCAAGATTCGTCAAGTCCATGCCAGACATGATATATTATATCGTCCGTGCACTTACCCTGTTGCAACGAGCATT  
 GCTCATCATTCTGTTTTACAGGAGCTCGTGAATGACCTGATGTCCTTCTACAAGGAGCAACTGGCCGGTGAAACA  
 GCCAATCTGATCCATCTCCAGCATCAGTCGTGGAAGGGAGGTCAGGGAACAGGGCCATATGGATCGTGGACGTTA  
 CTCGATACTTTACGCCGTCTGTGTGATGAGACGAGGGATGCTGCCTTTAGGGTTGACGAGCTCCTCAGACTGGATG  
 AATGCGAAAAGATAGCGAACGGGGAGTTGAGGGGTGAAGAGGTTGGTCTCTCGCCGATGGACGTAACGATGGC  
 GGCGCAGTGGCGTGAGTTCAGAGACGGATACGTATCTTGGCATCTGGAGTGCCAACGGTACAAGTTGGATTTTCAT  
 AAAGCTTAGCACGTTTGA

## Fungal sesquiterpene synthase coding sequences

### 1. Coding sequences obtained from published accession numbers (see also “Bioinformatic analysis”)

| Name   | Accession number |
|--------|------------------|
| ARMGA1 | P0DL13           |
| FgCLM1 | GU123140         |
| FsTS   | P13513           |
| Ffsc6  | HF563561.1       |
| Ffsc4  | HF563560.1       |
| BcBOT2 | AAQ16575.1       |
| PrAS   | W6Q4Q9           |
| AtAS   | Q9UR08           |
| BcBOT2 | AAQ16575.1       |

### 2. Manually re-predicted coding sequences in this work and from (5, 8, 9):

>HS-HMGS  
 ATGTCTGAAACCAAAGTTGGCAAAGTTGCTCCCTCCCCCTCTTCCCGGCGGCCATACCCTCCTGTTGTAATCA  
 TCCGCGATGGAAAGAACTCTACAGGCTCCATGATGAGTGGATGATGAAGTACTGGCCGTTGAGCAGCGAGAAGA  
 AGAGGGCTCGTATTCCGTTTCATGAACCTCGCGGGTTTTCAGTACATGGTGTGCACCTGCCGCTGACTTTGATCGCAT  
 GGTCTGGGGTGCCCGCATCGCTGGCATATTTTCTGGCCGACGATTATATCGACAGCGGGAAAATGTTGGACCG  
 CATCCCAGGCTTCAAAGCGGCTGCCACAGGAACCGGGCCCTCCACAAAGAGGACCAAGCAGAGATCTGTACGA  
 TATCGTGTTCGTCATCAAGGCAACCAGTACCCTCGGACCTTCGACCAGCTCACGAAGTGCACACATGAGTGG  
 TGGGATTCCAACATCCACGAGCCTTTCCAGAATCTCGACCAATATCTCGCAGTACGCCGTGTAACATAGCCATGT  
 ATTTTGCGAACGCTTACTTCCGTTACACCCTGGACATCAACCTTACCGACGAGCAGGTCAACCACCCCTGATGCGC  
 GAAGCTGAAGGCATTGTCTCCGACCACGTCGGCCTACCAACGATTTCTTCTTATCTTAAGGAGAAGATGACCA  
 ATTCCGACGACACCAACATTATCCGCATCCTAATGGACCACGAGCATCTCAGCTACGAAGAGGCGAAGACCGTCAT  
 CGAAAAGAAGATTCGCCAGAAGGAGCAGGACTTCATTGGCGCAGGGATGGCCGTGTTGAACGACCCTGAACTCG  
 GAAAGGATCGTGAGATCTATAGGTGGATCGCGAACTTACAGTACTGTATGGGCGGTAACCTTGCTTGGTCGCAAG  
 AGAGCGGCAGGTATAATGTCGGTGCATCGATGGGATTCGTTCCCTTCTTCTTCTTATCTTAAGGAGAAGATGACCA  
 CGAAGACGAAGTGGTCGACGACACTGAGGAGAGCAGGCTCCGCGAGCTGATCTTCAACGTCAAGGACATTCCTCC  
 TCCTGACTTCACTATCGATGACGACGCCATCTTCATGACCAACCCGCACAGCCATCTTCAAGACAACGTTGTACCTC  
 TCCCGCTCCTGAGAACGTCGGTATAATTGGTCTAGAAGTTATTTCCCAAACGCTGCATCTCCATTGACGCGCTG  
 GAGGACTTCGACGGCGTCGCGAAGGGCAAGTACACGATCGGCCTCGGGCAGCAGTACCTCGCCTTACGGACGA

CCGCGAAGATATCAACTCCTTCGCTCTTTCCGCAAGTGTCTCCCTTCTCGAGAAGTACAACATTGATCCGCGCAGCA  
TCGGTGCCTCGACGTCGGGACGGAGACTCTCATCGACAAGTCCAAGTCTGTCAAGACAACGCTCATGGACCTTTT  
CGCTGCCTCGGGCAACCACGACGTCGAAGGAATCGACAGCAAGAACGCTTGTTATGGGTTCGACGGCTGCTGTTCT  
GAACGCCGTCAACTGGATAGAGAGCTCGAGTTGGGACGGAAGATACGCTATCGTGTTCAGGTGATATTGCAAT  
CTATGCGGAGGGTCCGGCCAGACCTGTCCGGGGAGCGGGAGCCGTCGCGCTCCTGATCGGACCAGACGCACCCC  
TTGTTCTTGAACCTACACATGGCTCTTACATGGCCAACACCTACGACTTCTACAAGCCTCGCATGGAATCCGAATAT  
CCCGTGGTTCGACGGTCTTCTTCTGTCCACCACCTACATTACCGCGTTGGACGAGAGCTTCAAGGCGTACCAGCGGA  
AGGTGCAGGAGGGCTCTTCTCGAGATGTTCCCCGCCATACGCGAACGGGGCCAACGGAAAGGCATCCGCCACG  
AAGTCCGTCAAACCTCTCCGATTTGACTATTCTGTCTTCCATAGCCCATACGGCAAGCTTGTACAAAAGCTTACGG  
TCGCCTGACCTACCAGACTTCGTAGCCACCCTACTGCTCCGGTCTACAGAGATCTTCCACCAGACATTCTGAGCA  
AGGATGCTTCGGCAACCCTGACGGACAAGTCTGTGCGAGAAGACCTTCGCCGCCGCTCCGCATCCATGTACAAGC  
AAGTGGTCACCCCATCGTTCTCATCTCCAACCGCTGCGGTAACATGTACACCGGCTCCCTCTACGGAGGTCTTGCC  
TCCCTCTGACAAGCATTCTTCGTACGAGCTGTTGACAAGCGTATCTCGATGTTGCGGTATGGTAGTGGTTGTGC  
GAGCACCTTCTTCGCCATCAAGGTTCCGGGGCGATACGTCTCATATCAAGGCGAAGCTGGATTTGGAGAGGAGACT  
TGCGGAGATGGATGTTGCCCCGTGCGAGGATTACGTTGTAGCGCTCAAGCTTCGCGAGGAGACCCACAATGCTCC  
TTCGTACATTCCGAATGACTCAGATGCGGGCCTCTGGCCCGGCTCATACCGCCTTGAAGCCGTGGACGGGAAGTA  
CAGGAGGTCGTATACCGTCACCCATTGA

>Stehi128017

ATGGCTACTTCAAATCCTCCCTCCACCCTCATCACGAGTCATTAATCCTCCCTGACCTGCTTTCTGTGCGACACCTT  
TCAATGGCTCGACAAACCCGCACTGGGCCATGGCCGCCCCAGAATCTTACGCTGGGTCTCTAGTTACAACCTCTT  
CTCAGACCCGGAAGCGGACTGACTTCACTGGTTCGAACGAACTCCTCGTCTCACACACATATCCTCATGCCGATT  
ATGATGCCTTTGAAACATGTTGTGACTTTGAAACTTGCTGTTGCTCATTGACGAGATTAGCGACGATCAGAGCGG  
AAAGGCCGCGAGACGGACAGGGGAGGTGTATCTGAACGCGATGCGCGATCCTGAATGGACAGATGGCTCTGACT  
TGCGGAAGATGACACAACAATTTCCGCGCGTTCCTGAGGTGCGTTCGACCTCAATCCTTCGGTTCGCTTCTGAG  
GCACAGCGAAGACTACATCGACTGCGTGGCTAAGGAGGCAGAATATCGCGAACGGGGACAAGTGCTCGACATGG  
ATTCCTTCAAGTCCCTCAGGAGGGAGAACTCAGCGATCCGGTTGTGCTTCGGCCTGTTTCGAGTTACAGTTAGGGAT  
CGATCTTCCGGATTCAAGTGTGAGGATGAGACGTTTCAAGATGTACTGGGCCTCGGCGGACATGGTGTGTTG  
GGCAAATGACGTATACTCGTATAACGTGGAACAAGCTAAGGGTCACAGTGGGAATAACATCGTTACCGTCCTGAT  
GGCTGCGAGAGACATTGACATGCAGGCTGCGAGCGACTACGTCCGGTGAAGTACTATGCGGAGTTAATGGAGGAGT  
ACATGACGGCCAAGGCGGAACTGGCGTCAAGTGTTCGGGTCGAGGGATCTGGATGAGGACGTTTGGAAATAT  
GTGAACGCGATGGAGAAGTGGCCGATTGGGAATTTGGAGTGGTTCGTTCAAACGAAACAGGTAATCTCGGCACTCTA  
CACGACGAAGTGAACCGGACGCGATTGGTCTGATCAAGCCTCGGAAAGTCTGTTGTTAG

>Stehi25180

ATGACAGTCGTGGACAGCCACAACGTTTCTATATCCCAATTGCCTCGAGTACTGGCCCTGGCCTCGCCACATCA  
ATCCTCATTATCAGGAAGTGAAGAAGGCTTCCGCTGCCTGGGCCGAAAGCTTCGGTGCCTTCAACCCAAAGGCTC  
AACACGCGTATAATGCCTGCGATTCAACTTGTGGCTTCGCTCGCATACCCCTCGAGTCTGAAGAAGCTGCTGCGT  
ACCGGGTGCACCTCATGAATATGTTCTTCGTATTGACGAATACTCCGACGTCTTCCACAAAGGACGTTATCCA  
ACAAGCTGCCATCATAATGGATGCTCTGCGCAACCATAACGCGCCTCGTCTGACGATGAATGGGTTCGGCGGAGA  
AGTTACCAGACAATTCTGGAAGCGTGCCATCAAGACCGCCACCGCAGGGGCACAAAGACGTTTTATCGATGCGTT  
CGAAAGCTATACGCAGTCAGTCGTTCAACAAGCGAAGGATCGCCACCACGGGTTCAATCGTGACGTGACAGCTA  
TCTCGAGATGCGAAGAGAGACGATCGGCGCGAAGCCGTCGTTGCTGCTCCTCCAGATGGACATGACCCCTCCAGA  
CGAGGTTCTCGCTCACCCGGTCATCCAACAGCTGTCTGCCCTGTCCACTGATATGATATGCTTGGAAACGACATCT  
GCTCTTATAATGTGAGCAGGCTCGCGGCGACGACCTCCACAACATCATCACGATAGCGATGAACAGTTTGTATAT  
CGATATCGCCGGTGCAATGGATTGGGTTGTGAAGTATCACGCGAAACTCGAGCGAAAGTTCCTCTACCTTTACAAT  
AACGGTCTTCCATCATGGGGCAAGGAGCTAGACCCGAGGTGGAGCGGTACGTTCTGGATTAGGAAACTGGGT



TCGCGCCAGTGACCAGTGGGGGTTTCGAAAGCGAGCGATACTTTGGCAAAAAGGGGAAGGAGATTTTCAAGAGGA  
GGTGGGTGAACTTGATGCAGCCGGAGAGAGCGCAGGACATCGGTCCGACATTGGTTGATGGGACCAGATTATGA

>Stehi64702

ATGGTTCGCTCTCCCGTTTCCGATAAGTTCTGCATACCGGACACGCTAGCCAGCTGGCCTTACCCTCGTATACTCAA  
CCCCACTATGCCGAGGAGAAAAGCGGCGTCCGCTGCCTGGACGAAGGGCTTTGGCGCTTTTGGCCCCGAAAGCGCA  
GGATGCGTTCGATCGTTGCGACTTTAATTTGCTCGCCTGTTTGGCCTACCCGATCGCGACTCCAGAGAGATGCCGC  
AGCGGCTGCGATCTGATGAACCTGTTCTTTGTGATCGACGAGCATTAGACACACATGGCGAGGAGACAGTACGC  
AAGATGAAGGACGTAGTCATGGACGCCATCAGAAATCCCCACAAGCCCCGTCAAATGACGAGTGGATTGGAGG  
CGAAATTGCACGACAATTCTGGGAACGTGCAATGTGTTATGCTAGTGAGATCTCCAGCGACGCTTCATCGACACC  
TTCGATGAATACTTGAATCCGTCGTAGACCAGGCCGAGACAGGGACAGTGCAAGGATCCGTGATATCGAGAG  
CTACATTAACATTCGTGCAACACTATCGGAGCGAAGCCCTCGTTCGTCATCATGGAGCAAGGCATGGACATCCCC  
GACAACGTCTTCGAGAACGAGGTGTTTCAGAGACTTCGCATGGCCACGATAGACATGCTTTGCCTTGGAAATGAC  
ATCGTATCATAACAATTGAACAAGCTCGAGGTGATGACTCCATAACATCGTGAGAATTGTCATGAACGAGCTCG  
ATACCGATGTCCCTCGCGCTATGGATTGGGTAGCTCAGAGACATACGCAACTCGAGCGCGAGTTCTTACC CGCGCT  
GAGCGAGCTGCCACTTGGGGAGAGCCGATCGATGGATGGGTGAAGGAGTATGTCTATGGTCTGGGGAACTGG  
GTGCGCGTAACGACCAGTGGAGTTTCGAGAGCCAAAGGTATTTTGAACCAAGGGCATGGAGATCATGAAGTC  
AAGGTGGCTTTTCGTTTTGCCCAAGTCCGCCCTGCTGAGGTGGTCCACAACCTTGTGACCAATCTCTCTTATGA

>Stehi73029

ATGGCTGTCGCTACCTCTGTTGCCACTCCTGTTCTACTCCCGCCTACTCTGCTGGCCGCGCTCCGGCCAAAGAGAA  
GAAGATCTATCTTCCCACACTCGCTGAGTGGCCTTGGCCTCGCGCCATCAACCCTACTATGCTGAAGCGAAG  
GAAGAGTCTAAGCATGGGCCGCAAGTTTCAATGCTTTCAGCCCGAAGGCTCAGCACGCCTTCAACCGCTGCGACT  
TCAACCTTCTGTCATCCCTCGCTTACCCGCTCGCCACTAAACATGGATGCCGCTCAGGCTGTGATCTCATGAACCTTT  
TCTTTGTCATCGACGAGTACTCTGATATCGCTCCCGTTCGAGGAGTCCGCCAGCAAAGGACATCGTCATGGACGC  
TCTCCGGAACCCACACAAACCACGTCCCGAGGGTGAATGGGTGGGCGGTGAAGTCGCACGGCAATTCTGGGCTCT  
GACCATACCAACGCTAGCGCTCAGTCGAGAAGCACTTCATCGAGACTTTTCGACGAGTACCTCGACTCCGTTGTT  
CAGCAGGCTGAAGACAGGTCAGAGTCACGGATCCCGACATTCAGAGTTATATCGACGTCGCCCGCAACACAATT  
GGTGCCAAGCCATCATTGCCCCTCGAGCTCGATATGGACCTTCCCGACGAGGTTCTCGCCATCCCCTACTATCCA  
ATCACTTCCCTTGCCACCATCGACATGCTTTGCTTGGCAACGACATTGTCTCGTATAACCTCGAGCAAGCTCGTG  
GTGATGCCAGCCACAACATCATCACCATCGTCATGAACGAGCTCAACCTCGACGTCAACGGTGCCATGCGATGGG  
TAGGCGACTTCCACAAGCAGTTGGAGAAGCAATTCTTCGAGGCGTTCAACAACCTTCCCAAATGGGGCAACGCGG  
AGCTCGACGCTCAGATTGCAGTGTACTGCGACGGACTGGGGAAGTGGGTTCTGTCGAAACGACCAGTGGAGTTTCCG  
AGAGCGAGCGCTACTTCCGGGCTAGGGGTCTTGAATTATGGAGACGAAGACCCTGGCGATGATGCCTATTCAG  
AGGACGGAGGCATTGGGCCCTCAGCTTGTGATGACTCCATTTTGTGA

>Omp1

ATGAAGTACACTTCTTTGCTCTTCTGATCTCGCTTCTTCTGCGACTATAACTTACGCTTCAATAAGTACCACAGG  
AGCGTATCTCTGAAACCAAGAAATGGTTCTCAGGCTGTCACCAGCATCCCAAGCTGATTTAACGACGTATGATG  
CACAACGGTTCACTCTACTCGCCGAGTGTGCTATCCTGATGCGGGATACCCTCAACTACGCGTTTGCTCAGACTTT  
CTAGCCTATCTATTCTACCTGACAATCTTACGGATGACATGGACGACAAGAGCACGAGATCGGTAGCTGATCTTG  
TTCTAAACTCCCTCAACGAACCGGAAACCTTTAGACTCAATACCGGATTGGGAAGATGACAAGCGATTACTTCAA  
GCGAATCATCCAGACCTCGAATGACGGTACGAAAAAGAGGTTCAATTGATACAATGGACTCCTTTTTCAAGAGCGTC  
GATGATCAAGCTCGCGACCCTAGCAGGTATATCCCCGACCTTGAATCATATATTGCTCTACGTCGGGAGACCT  
CTGGATGCAAGACGTGCTTTTCTTTGATCGAATACGCCAACAATCTCCATATTCCCGATGAAGTTATCAGCCATCCG  
CATATTGAGCAGATGGAGACCCTGCTAACGATGTCGATCCTTTGCAAACGATATCTATTCTTTAACATAGAACA  
ATCAAAGGGAGATACCCACAACATGATACCCGTCCTCATGCACGCAAATCCTGATATGGACTTCTCGAAGCTGTC  
AGTTTTGTACGTGATCTACGATTAAGCAATGGACCGATTCAACGAGCTTCGAGCTACGTTACCTTCTGGGGTCT

GGATATCGACAAGGACATGAAAGTCTACGTGAATGGGTTGGAGAACTGGATGGTAGGAATCCTGTTCTGGTCGTT  
TGAAACAGAGAGATATTTCTGGGAAGAGCGTACGCTCTGTGAAAGCGACCAAAACAGTCAATCTGTTACCATCTCG  
TGCATGA

>Omp3

ATGGCCATTGAGAACACTATCGCCTCGGCTCCTGCTTCCACTCCCGCTAAACAGCTAGATACTCCTGACCATTTTCAT  
CCTTCTGATCTCGTCTCACACTGCACCTTCCCCCTTGTTTACCACTCGAACGGTGACGCCGTTGCAGCTCAATCGGT  
CAAGTGGCTTGACACGAACTGCCCTGACTTGAACGACAAGCGCAGGAAGGCTTTGTATGGCTTGCAAGCTGGAGA  
GCTGACTGCCTATTGTTACAACACTGCACCCGATCAGCGGCTCCGCGTTGTTTCTGACTTCATGAACTATCTGTTCC  
ATTTGGATAACATCAGCGATGGGATGATGACAAAGGACTGATGCGCTTTCTGACGCCGTCATGAACGCCTTGT  
GGTTCACCGAGTGGTACCGCCCTACAAAGAAATCCGACTATGTCCAGCCCGACGAAGAGCTCAACGCAGGCAAGC  
TTGCCCGAGATTTCTGGCACCGCTGCATTCAAGACGCAGGCCCGGGATGCCAAGCACGATTCAAAGAGACGCTCG  
AGCTTTTCTTTGAGGCTGTCAATATCCAGGCTAAAGCCCGTGACGCCGGCGTTATCCCTGATTTGGAATCGTATATC  
GACGTCCGACGGGATACTTCTGGCTGCAAGCCTTGCTGGGCTCTCATTGAATACGGCTTGGGCATTGACCTGCCTG  
ACTATGTTGCTGAAGATCCCATCATCAAGTCGCTCAACCAGTCCACCAATGACCTTGTTACTTGGTCTAACGACATC  
TTCTCTTACAATGTAGAGCAATCCCGAGGTGATACGCACAACATGATCGTCATCCTTATGCTCTACCACGGACACAA  
CCTCCAGAGTGCCATCGACTACGTCGGTGTCTTTGCCGTCAGACGATTGACGATTTCAAGGAGAATAGGAAGAA  
GATTCTTCTTGGGGTCTGAGGTGGACGATATCGTCAAGCAGTATGTCCAGGGTCTTCAGGACTGGATCGTTGG  
ATCTCTCCACTGGAGCTTCATGACTACTCGCTACTTCGGCAAACAAGGCCAGGAGGTCAAGAAAAATAGATACGTC  
AAGCTTCTGCCTGTCGGAGAGGAGGCCAACAAAGTGGTAA

>Omp4

ATGTCTTCTGCTCCTACGCGCTTTCTTCTCCTGACCTCCTGTCGGCTTGTCCACTCAAAGGCTCTGTAAATCCTTACT  
ATAAAGAAGCAGGGCGAGAATCGTCAGCGTGGATCAACAGCTATGATATATTTCACTGATCGGAAACGCGCTTTCTT  
CGTCCAAGGCTGCAATGAACTGCTCGTAGCGCACACATACCCATACGCAGGCTACGAAGAATTTGCAACGTGCTG  
CGACTTCATCAACGTGCTCTTTGTCCTCGACGAAGTCAGCGACGAACAGAGTGGCTCAGATGCTCGTTTCACTGGC  
GAAGTTTTCTGAATGCCCTGCGAAATCCCGAGAACGACGATACCTCCAAATTGTCTAAAATCAGTAAAGAATTCC  
GAGCGCGTTATTTCAAACGTGCAGGCCCTAGAACGGCTGAACGTTTCTCCAACATTGTCAAGACTACATTGACTG  
TGTACGCGAGAGGCTGAGCTTCGTGAACGTGGAGAGGTCCTCGATCTTCTTCTTTTACCGCCCTGCGTCGCGAG  
AACAGTGCCATTAGGGTTTGCTTCTGTCTTTTTCGAATATGCCCTAGGTTTTGATCTTCCCCAAGAGGTATTTGATGA  
TCCGACGTTTATGGAGATGTAAGTGGGCTGCTGCGGACCTCGTCTGCTGGGCAAATGACGTCTATTCTTACAACAAG  
GAACAAGCACAAGGACACGGTGGGAACAACATTGTCACTGTTCTCATGAAAGCGAAGGATCTTGATTTGCAGGCT  
GCCTGTGACTACATCGGTGTGTAAGTGTGAGGAGTTGATGGGGCGTTATTTATCTGCCAAAGCCCCTTACCTTCTT  
GGGGCCCTGAAGTTGATGCTGCTGTTGCACAGTATGTAGAAGCTTCAGGTCAGTGGGTGCGAGGGAATCTTGATT  
GGAGCTTTGAGACACAGAGGTAAGTGGTGTCTGAGATGCTGAGATCAAGGAAACACGTCTCGTCACTTTAACGC  
CAGCAATTTCCGAGGACTTTAGTGACACAGGATCTGAGAGCGAGTGA

>Omp5a

ATGTCTCCTGATCCTACCCGCATTGTTCTTCTGACTTCTTGGCCGCTTGTCCGTTGAAAAGCTCTACGAAAAACCT  
CACTTGAAAGCGGCAGGGCGAGAATCGTCGGCGTGGGTCAACAGTCATGTTGTATTCAACGACCCGAAACGCGCT  
GCCTTCATGCAAGACATCTATGAACTTCTCGTAGCCTACGCGTTCCTTGGGAGATTATGAAGATTTTCAACAAT  
GTGCGACTTTATCAACCTTCTTCTGTCCTCGACGAACTCAGCGACGATCAGAATGGTAAAGACGCTGGTTACACT  
GGCAAATTTTTCATGGATGCCATGCGAAATATCGACAATGGTGATACCTCCGAATTGACTGAACTTTGCAGAGAAT  
TCAAAGCGCGTTATAGTAAACGTGTAAGTCTCAAGTGAATGAGCGCTTCTTTCAGCATTGCAAAGCTACACCGA  
CTGTGTCGCGCAAGAGGCTGACCTTCGTGAACGCGGAGAGATCCTCGATCTTGAATCTTATGTCGCCCTTCGTCGC  
GAGAACAGCGCTATCAGACCTTGCTTCGATCTGGTTCGAATATATCATAGATTTTATATTTCCCAAGAGGTGATTG  
ATCATCCAGTATTCTCGGAGATGTAAGTGGGCTCTGTTGACCTCGTTTGTGTTCCAAATGACGTTTATTCTTATAAC  
GTGGAACAAGCGAAAGGACACGGCGGAAGCAATGTGGTCACTGTTCTCATGAAGGAGAAGAATCTTGATTTGCA

GGCTGCATGCGACTACGTCGGTGTATACTACGAGGAATTGATGGATCGTACTTGTCTGCCAAAGCCCGTCTACCT  
TCTTGGGGTCTGAAATTGATGCAGCTGTTGGGAAGTATATATTGGCTGAAGCTCAATTCGTGAGAGGAAATCTTG  
ATTGGAGCTTTGACTCTCCGAGGTACTTTGGTCTCAGCATGATCAGGTCAAGAAGACGGGTATCGTCACTCTGAC  
GCCAGCTCCCAAGAAGTTTGGCAGTGACAGTGGATCCGAGAGTGAGTGA

>Omp5b

ATGTCTCCTGCTCCTAGCCGATTGTCCTTCCTGACTTCTTTGCCTCTTGTCCGTTGAAAGCTCTACGATAAACCCCT  
CACTTCAAAGCTGCAGGCGCAGAATCGTCGGCGTGGGTCAACAGTCATGTTGTATTCAACGACCGGAAACGCGCT  
GCCCTCATGCAAAACAGCTATGAACCTCTCGTAGCCTACGCGTCCCTGGGCAAGTTATGAAGATTTCCGAACATT  
GTGCGACTTTATCAACCTTCTTTCGTCTTTGATGAAGTCAGTGATGATCAGAATGGTAAAGACGCTGGTTACTA  
GCAAGATTTTCATGGATGCCATGCGAAATATCGACAACGGTGATCACTCCGAATTGACTGAACTTTGCAAAGAATT  
CAAAGCGCGATTTAGTAGACGTTTAAGTCCTCAAGTGAATGAACGCTTCTCCAGCATTGCAAAGCTACACCGAC  
TGTGTGCGCAAGAGGCTGACCTTCGTGAACGCGGAGAGATTCTCGATCTTGAATCTTATGTCATTCTTCGCCGCG  
AGAACAGCGCTGTTAGACCTTGCTTCGATCTGGTCAATATATCATGGATTTTGATATCCCAAGAGGTGCTCGA  
TCATCCCGTATTCTCGGAGATGTAAGGCTCTGTTGACCTCGTTTGTGGTCCAATGACGTTTATTCTTATAACGT  
GGAACAAGCGAAAGGACACCGCGGGAGCAATGTGGTCACTGTCTCATGAATGAGAAGAATCTCGATTTGCAGG  
CTGCATGCGACTACGTCGGTGTATACTACCAGGAGCTGATGGATCGTTACTTGTCTGCCAAAGCCCGTACCTTCT  
TGGGGTCTGAAATTGATGCAGCTGTTGGGAAGTATGATTGGCTGAAGCTCAATTCGTGAGAGGAAATCTTGAT  
TGGAGCTTTGACTCCTCGAGGTACTTTGGTCTCAGCGTGATCAGATCAAGAAGTCGCGTATCGTCACTTTGACGC  
CAGCTCCTAAGAAGTTTGGCAGTGACAGTGGATCCGAGAGCGAGTGA

>Omp6

ATGATTGCAAAGAACTCCGAAATCGATAGGTTTTACATCCCTGATACCCTTGCTAACTGGCCATGGCCCCGTCACCT  
CAACCCAGCTTATCCTGAAGCGAAAAAGGCCTCTGCTGCCTGGCTCAGAAGCTTCAACGCTTTCAATGAGAGATCT  
CAGAAAGCATTGATTTGTGCGACTTCAACCTTCTTCTTCCCTGGCCTTCCCTCTTGCCGATCTCTATTGTCTGCGT  
TCAGGATGTGATCTCATGAACTGTTTCTTCTTCTGACGAGTACTCGGACGTTGCTGACCCCCAAACCGTGCCTCA  
ACAAGCCGACATAATTATGGATGCGATTGTAACCCTCACGTCCCACGCCCGAGAGGCGAATTCATAGGCGGTGA  
GGCTCATAGACAGTTCTGGGAACGTGCCATGCAGGGCGCTACCCCCACGGCTCAACGCCGTTTTCATCGACTTAT  
CAGCAGTACACGGACGCTGTTGTTTCAAGCAAGCTACCGACAGAGCCGACAACCACATACGTGATGTTGAAGGCTAC  
TTCACCGTTCCGCCGATACTATCGGTGCCAAGCCTTCACTTTGCTCGAGTTCACCATGGACATTCCAGATGA  
GGTCATGGGACACCCCGTATCAAAGATCTCTCTTTGGTGCATCGACATGCTCATCATCGGTAATGACCTATGCT  
CATAACGTCGAGCAAGCACACGGAGACGACCTCCATAACCTGGTCACTATCGTCATGAACCAGTACAACCTCGA  
TCTCCCAGGCGCAATGGAATGGATTGGCAAATCCACGACGACATAGCCGATAAATTCCTCGACACATTCCGCAAA  
CTCCAAGCTGGGGCCAGAAATTGACCCTCAGATCCGTCGTTATGTTGACGGACTCGGAAACTGGGTGCGCGGG  
AATGATTCTTGAGCTTCGAGAGCTGGAGGTAATCCGTTGGCAAAGGCCCGAAATCGAGAAAATCGTTGGGTG  
GACCTCATGCCGACGGAAGAGGCGACTATTACACCGAAATATGAATCAGATTCGAACGCAGCTCAACCCGCTCAA  
AGTACTTAA

>Omp7

ATGCCGGAAACTTTCTACCTGCCCCGATTGTTTGGCGAACTGGAAATGGAAGCGTGCACTCAATCCTAATTACCCTG  
AGGTGAAAGCAGCTTCTCTGAGTGGCTGAGGAGCTTCAAAGCTTCCCTCCCAAAGCCAGGAGGCTTATGACC  
GATGCGATTTCAATCTTCTGCATCCTTAGCGTATCCTCTGGCAGACAAAGATGGGCTCCGCACCGGATGCGACCT  
CATGAACATGTTTTTTCGATTCGACGAATACTCGGACGTTGCACACGAATCAGAAGTGCAGGTCCAAGCAGACATC  
ATTATGGACGCTCTGCGTAACCCTCACAAACCCCGACCTGTCGAGAAATGGGTTGGCGGCAAGTACTAGACAA  
TTTTGGGAGCTCGCCATCAAACCTGCTAGCCCGCAATCACAGAAACGTTTTCATCGAGACTTTTCGACACGTACACCA  
AATCCGTTGTCCAGCAGGCAGCTGATCGTACACAGCACTATGTGAGGACCGTGGATGAGTATCTTGAAGTTCGAC  
GGGACACCATCGGAGCCAAGCCGTCATTGCAATTCTGGAGCTCACCATGGACATTCTGACGAAGTATCCACCA  
TCCGACAATCGAGAGACTGGCAATACTTGCATCGACATGATTCTGTTAGGAAATGACACCGCTTTCATATAATTAT

GAACAAGCTCGTGGTGACGACAACCACAACATGGTGACAATTGTCATGCACCAATACAAGACCGACATTGAGGGC  
GCTTTGAGCTGGATCGAGAAATACCACAAGGAGCTTGAAGAAGAATTCATGCAGCTCTACAACAGCCTCCCAAG  
TGGGGTGGTCAAATCGACGTGGATATCGCGCTTATGTGGATGGTTGGGCAACTGGGTGAGGGCTAGTGACCA  
ATGGGGCTTTGAGAGCGAACGGTACTTTGGCACGAAAGCTCCGAAATTCAGAAGACCAGATGGGTGACGCTCA  
TGCCAAGAAGCGTGCCGAAGGTGTCGGTCCCGAGATCGTTGATATTTCTGAGCTCTAG

>Cop1

ATGTCTTCGCTTGACGCAACCATCCACCCGGTTTTGAACTTCGAGGACAAGAAGATTGTCCTTCCCGACCTCGTCTC  
CCACTGCAACTTCAAGCTTCGCGTCAGTAGACACCGAAAACGAATTACTGGCGAGACCAAACGCTGGTTGTTCAAG  
GGCGACAATCTTGTGCGCCCTGCGCGAAACAAGTACCATGGATTGAAAGCTGGCCTCTCACCGCCATGACTTACC  
CTGATGCTGCATACCCCAATTGCGTCTTTGCAACGACTTCTCACATATCTGTTCCACATTGACAACCTCTCAGACG  
ATATGGACAACCGAGGGACGTGGAGCACTGCGAATGAAGTTCTTAACAGCCTCTACCATCCCTACACCTATCATGG  
CCAAGCGCGAGTTGGGAGGATGACCAGAGATTACTGGAGGCGGATGATTCTTACCGCTCACCCGGCTCTCAACA  
ACGTTTCATCGAGACGTTTGACTTTTTCTTCCAAAGTGTACACAACAAGCGATTGATCGCTTGACCGGAGAGATA  
CCTGACCTGGAGTCTACATCGCCCTTGAAGGGATACCTCTGGATGCAAGCCATGCTGGGCCTTGATAGAATACG  
CCAACAATCTTGATCTTCCGGACGAGGTCATGGACCACCCTGTTGTTCTGATGCTTGGAGAGGGCCCAATGATCT  
TGTGACGTGGTCCAACGATATCTTTCTTCAATGTCGAACAGTCAAAGGCGATACGCATAACATGATCCCTGTG  
GTGATGCATCAAGAAGGCTTGGATCTTCAAGTCAAGCGTCAACTTTGTTGGCGAAATGTGCAAGTCAGCAATTGAC  
AGTTTCATCGAAGACCAAACTACCTGCCTTCTGGGGTCTAAAATCGACCGGGACCTGGCTGTCTACATCAATG  
GACTTGCAGACTGGATCGTTGGGTCACTACATTGGTCTTCAAAGTGAAGCGATACTTTGGCAAGAATGGACGAC  
AGGTCAAGTCGAGTCGAGTAATTGATTTGCTCCCTCGACGATCACAGTAG

>Cop2

ATGCCAAGTCCCGCGGGAGCGCTTCCCAAGTCCTTCACTTCCCGACCTGGTCAACGACTGCCATTCCCCCTTCG  
AGTCAACCCACTCTGCGACGAGGTTGGGAGACTATCCGAGCAATGGTTCCTCCGCTATGCAAATTATTCGCCCCCT  
CGGGCAGTGGCGTTTATGGCACTCAAAGCGGGCGAGCTCACTGCTGCATGCTACCCAGATGCCGATGCCTTCCAT  
CTCCGAGTCAGCGACGACTTCACTGAACCTTCTTCAATGCCGACGATTGGCTAGACGACTTGCACATTGAGGACA  
CGTACGGGCTGGCCAATTGACTGTTGAGCCCTGCGCGACCCAGTCAACTTCATTAAGATAAACCGCGCAGGACT  
AATGACGAAATCATATTTTTCTGATTCTGAAGACCGCTGGGCCTCGCTGTACAGAGCGCTTTATCCAAACGTTG  
GCGCTCTACTTTGAATCAGTAGTAACGCAAAAGCAAGCTCGTAACAATGGCACTTTGCCGATTTAGAGAGCTACA  
TCACCATTGCAAGGAATAACAGCGGCTGTAAACCTTGTATGCACTCATCGAGTTCTGTGCTGGCATTGATTTGCC  
GGACGAGGTTATCAATCACCAATTATTCATCGCTCGAAGATGCTTCAATGACCTTATTGCTTGGTGAACGAT  
ATCTTCTTTCAACAGGGAGCAATCTCGCCATGACAGCTTCAACATGGTTTCCATCGTTATGCACCAGAAGGGCTT  
TGCGCTTCAAGGAGCTGTCAACTTTGTTGGAGAGCTTTGAAAAAGGCGATGGAACGTTTTAGGCGGATAAGAG  
GAATCTCCCTTATGGGGTCCAGAGATTGACGGGGAGGTCGCAATGTATGTTGATGGGCTGCAGAATTGGATAGT  
CGGGTCTTAAATTGGTCCATCGACGGGACAGAGCGCTATTTCCGCAAGACGGGCCTGGAATAAAGAAGCATA  
GAATAGTCAAGCTATCCCAAGCGCCATTGAAAACACCTGCTGTGCGGGTTTTGGCCTAA

>Cop3

ATGTCGACGCCCTCGTCTTCTCTACCACTGATGAGAGCCCCGCATCCTTCATCCTCCCTGATCTCGTCTCACACTGT  
CCTTTCCCCCTCCGATACCATCCCAAGGGAGATGAAGTGGCCAAGCAAACCGTCTATTGGTTGGACAGCAACTGTC  
CCGACTTGACTGCGAAGGAACGAAAGGCGATGTATGGACTCCAAGCAGGCGAGCTCACAGGGTATTGCTACCCCT  
ACACCACCCCGAGCGACTACGCGTCGTCGCCGACTTTTTGAACTATCTTCCATCTTGATAACATTAGCGATGGC  
ATGATGACACGCGAGACGGCCGTGTTGGCCGACGTTGTCATGAACGCTCTTGGTTCCGGAAGACTACAGACCA  
ACCAAGGGCCAGGCTGCGGAAGAGCTCAACCCTGGAAGCTTGCAGAGATTTTTGGTACCGGTGTATTCCAGAT  
TGCGGACCTGGAACGCAAGCTCGTTTCAAGGAGACTTTTGGTCTTTCTTTGAAGCTGTCAATATTCAAGCACGCG  
CTCGTGATGAGGGTGTATCCCGATCTAGAGTCTATATCGATGTCAGGCGGGATACTTCAAGTTGTAAGCCTTG  
TTGGGTGCTCATTGAGTATGCGCTGGGCATCGACCTCCCTGACTTTGTGGTTGAGCATCCTGTTATCGCCGCGTTG

AACCAAGGCACCAATGATCTCGTAACTTGGTCGAACGATATCTTCTCCTACAACGTTGAACAATCTAAAGGCGACA  
CTCACAACATGATCATAATTCTGATGGAACACCATGGCCATACCCTCCAGAGCGCCGTCGACTACGTCGGATCCCT  
CTGTCAACAGACCATCAACACCTTTTTCGAGAACAAACAAAAGCTCCCATCGTGGGGACCTGAAATCGGCGACAT  
GGTCGCAAAATACGTTACAGGGTCTAGAGGATTGGATTGTTGGGTCACCTCACTGGAGTTTCCAGACGCGTCGATA  
CTTTGGAGATGAAGGCCAAGAAATCAAGCAGCACCGTTTGGTTAAACTGTTGACTGTCGCCCCCTCACCGCCGCCA  
CCGCCTCCGACACCGCCCTCGCAATCCTCCGACGCGGACACCAAGAAGCAAAAGGTCAAGGCACAGGACGGGAA  
GGGTCCCGTTTCGGATGAAGAAGTTTGGGCGCTTGTAGGGCCGAGCAGTCCAAAGGATCTATCCTCGAGTCACT  
ATTCGGATTCTAACGACATCTCTGTCACGCATCTTCTTTGGCTATTTCTTGCCTATTCGCATTAA

>Cop4

ATGCGTCCAACCTGCCCCCAATCACTCTCCCCGACTTGTTTTCCATCTGTCCCCTCCAGGACGCGACCAATCCCTG  
GTATAAACAAGCGGCTGCTGAGTCTCGCGCATGGATCAATAGCTACAACATCTTACCGACCGCAAACGCGCCTTC  
TTCATCAAGGCTCCAATGAACTCCTGTGCTCGCATGTTTACGCATACGCCGGCTACGAGCAATTCAGAACCTGCTG  
CGACTTCGTCAACCTACTGTTGCTCGTCGATGAAATCAGTGACGACCAGAACGGCCAGGATGCACGGGCCACAGG  
TCGGATATTCGTCAACGCTATGAGGGATGCACACTGGGACGACGGTTCCATCCTTGCCAAAATCACACATGAATTC  
CGCGAGCGCTTCGTCCGCTTGGCTGGTCCGAAAACCGTTCGACGATTTGCTGACCTTTGCGAGAGCTACACCGATT  
GCGTTGCCCGAGAAGCGGAACTGCGCGAACGGAATCAAGTCTCGGATTGAACGATTTTCATCGCCCTTCGCCGAC  
AAAACAGCGCAGTTCTACTTTGCTACTCCCTCGTCAATACATTCTGGGGATCGACCTTGACGATGAGGTCTACGA  
AGACCTACCTTTGCCAAGGCGTACTGGGCTGCTTGTGATTTTGTGTGTTGGGCCAACGACGTCTACTCTTATGACA  
TGGAACAAGCGAAAGGCCATACGGGCAATAACGTCGTCACGGTGCTGATGAAGGAGAAGGATCTCAGCTTGCAA  
GAAGCATCAGATTACATTGGGCGAGAATGCGAAAAACAAATGCGCGACTACCTGGAGGCCAAGTCTCAACTACTA  
CAATCCACCGACCTGCCGCAAGAAGCTGTTGATACATCGAAGCTCTGGGTTACTGGATGGTCGGAAACCTAGTAT  
GGAGCTTCGAATCCCAACGATACTTCGGTGCTCAACATGAACGGGTGAAGGCGACGCACGTGCTGCACCTTCGAC  
CAAGCAGCGTTCTCGAAGCATCATGCGATTCCGACTCTGACAGCGACTGTTGA

>Cop3

ATGTCGACGCCCTCGTCTTCTCACCCTGATGAGAGCCCCGCATCCTTCATCCTCCCTGATCTCGTCTCACACTGT  
CCTTTCCCCCTCCGATACCATCCAAGGGAGATGAAGTGGCCAAGCAAACCGTCTATTGGTTGGACAGCAACTGTC  
CCGACTTGACTGCGAAGGAACGAAAGGCGATGTATGGACTCCAAGCAGGCGAGCTCACAGGGTATTGCTACCCCT  
ACACCACCCCGAGCGACTACGCGTCGTCGCCGACTTTTTGAACTATCTTCCATCTTGATAACATTAGCGATGGC  
ATGATGACACGCGAGACGGCCGTGTTGGCCGACGTTGTCATGAACGCTCTTTGGTTTCCGGAAGACTACAGACCA  
ACCAAGGGCCAGGCTGCGGAAGAGCTCAACCCTGGAAAGCTTGCCAGAGATTTTTGGTACCGGTGTATTCCAGAT  
TGCGGACCTGGAACGCAAGCTCGTTTCAAGGAGACTTTTGGGTCTTTCTTTGAAGCTGTCAATATTCAAGCACGCG  
CTCGTGATGAGGGTGTATCCCGATCTAGAGTCTATATCGATGTCAGGCGGGATACTTCAGGTTGTAAGCCTTG  
TTGGGTGCTCATTGAGTATGCGCTGGGCATCGACCTCCCTGACTTTGTGGTTGAGCATCCTGTTATCGCCGCGTTG  
AACCAAGGCACCAATGATCTCGTAACTTGGTCGAACGATATCTTCTCCTACAACGTTGAACAATCTAAAGGCGACA  
CTCACAACATGATCATAATTCTGATGGAACACCATGGCCATACCCTCCAGAGCGCCGTCGACTACGTCGGATCCCT  
CTGTCAACAGACCATCAACACCTTTTTCGAGAACAAACAAAAGCTCCCATCGTGGGGACCTGAAATCGGCGACAT  
GGTCGCAAAATACGTTACAGGGTCTAGAGGATTGGATTGTTGGGTCACCTCACTGGAGTTTCCAGACGCGTCGATA  
CTTTGGAGATGAAGGCCAAGAAATCAAGCAGCACCGTTTGGTTAAACTGTTGACTGTCGCCCCCTCACCGCCGCCA  
CCGCCTCCGACACCGCCCTCGCAATCCTCCGACGCGGACACCAAGAAGCAAAAGGTCAAGGCACAGGACGGGAA  
GGGTCCCGTTTCGGATGAAGAAGTTTGGGCGCTTGTAGGGCCGAGCAGTCCAAAGGATCTATCCTCGAGTCACT  
ATTCGGATTCTAACGACATCTCTGTCACGCATCTTCTTTGGCTATTTCTTGCCTATTCGCATTAA

>Stehi159379

ATGGAGTCCGTCAGGGAACACATTCTCGCCTTCAGCACTTCTCGGCGAGATCGGCTATCGTCACACCACTCCTCC  
TGCACCGACGCTCGATTTTCTTTCATGCGCATCACCCTGGATACACCATGTAAGTGGGCCCATGACTTCATGGACG  
GTGGCCAACTAAACGCACTCGAAGACTCATCCTCGACCATTTTCGAGAGAGCATACCCGTTGTCCGACGCCGAGA

TGAAGTTCGTCCTTGCAAAGCTCACGGCCATAGCCATTTTCCTCGACGATTCTCTCGAAGATGAGGAGACCTATGACGATATCGGCAACTTCGCACATCGTGTCTACCTGGGCGAGGCCAGCCGACCGGGGTCCTACCCTCTACCACCAAGGCATTCAAGAGCTTTCCAAGATGCACGAAGGCGACGCGGTCTTTAGAGGCCTCGCTGTGCGACCTGGATTACCTTCATCGACGCCTGCATGTTAGAGAAGAGACTTCTGACCTTCGACTCGAAGCTACGCGTCAGTCCTCGCGATCTGGGATATCAGCGCCTACGAAACAGCACAGATTTTACGTCCTCCGAGCTCCGAAGGCTACTCCAAGTGAAGTAGAGGTTAGCTTTCCTATCTTCCTTCGCCACAAGAGTGAATAGGAGAAGCCTATGCCGCTGCGATCTTCAAATCGTCTAGATACCAGGAGTTGCCTCTATCAAGATTCGTCAAGTCCATGCCAGACATGATATATTATATCGAGCTCGTGAATGACCTGATGTCCTTACAAGGAGCAACTGGCCGGTGAACAGCCAATCTGATCCATCTCCAGCATCAGTCGTGGAAGGgAGGTCAGGGAACAGGGCCATATGGATCGTGGACGTTACTCGATACTTTCAGCCGTCTGTGTGATGAGACGAGGGATGCTGCTTTAGGGTTGACGAGTCTcTCAGACTGGATGaATGCGAAAAGATAGCGAaCGGGGAGtTGAGGGGTgaAGAgGTTgGTCTCTCGCCGATgGACGTaACGATGGCGGCGAGTGGCGTgaGtTCAGAGACGGATACGTATCTTGGCATCTGGAGTGCCAACGGTACAAGTTGGATTTATAAAGCTTAGCACGTTTGA

>Cop6

ATGCCTGCAGCTTTGCCATACAACGTGTCCCGAGACAACAAGTGGGACATCAAGAAGATTATCCAAGACTTCTTCAAGCGCTGCGACGTTCCGTACCAGGTCATTCCATACGACACAGAGCTTTGGAATGCCTGCTTGAAGCGCGCAAGGAGAAGGGCTATCCTGTGAGCCCCAGACCCCCATGAGTCTTTACAGGTCATTCAAAGTGGGGGTTGTTATCACAAAGGACGTCTACGGCCACATCCAGGATTACGAGATCCTGATCTGGGTGGCAACATTCACCGCCTTCGTCACTACGCGACGAGCTTTCCAGGAGGACATCCAACACCTCCACTCCTTGGCTAGAACTTCTCCAAAACGAGAAGCACGAGCACCCAGTCTCGAAGCCTTCGCCAGTTTCTCCGAGAGTCGTCCATCCGCTTCAGTCACTTCGTGCGCAACACCGTTGTCTCGTCGGCACTCCGCTTCATGATGAGCATCGCCCTGGAATTCGAGGGCCAGAATGTATCTGTGTCTACAGAGGCTCGCGAATATCCCGGATACATTGGAATTCTGTCTGGTCTGTCCGACATCTACGCGCTGTTTGGCTTCCCTATGGACCTGCCCGTTCCACGTACATTACAGGCTTCCCCGAGCAAATCGACTACATAAACGGAACCAACGATCTCCTCTCGTTCTACAAGGAGGAGCTGGACTGCGAGACAGTCAACTTCATTTACGAGCTGCTACGTGCGAACAAGTCTCCAAACTCGAGGTACTACGGAACGCAGCAGAGAAAGCAGCGTATTGTCGACGTCGTGTTAACGTTCTGAAACCTTATCCCGAGGCCCTGGCAGCATGGAAGAGCTTTGCGCGAGGGTTCTGCTACTTCCACACATCTCACACGTTACAGGCTGGCGAGATGTTCCATGACTTTGAGCATGATTTGTTTGAAGTGTGCGAGCTGCACGGAGATTTAG

>Omp9

ATGTCGAAATACTCCACCTCTTATGGTCAAAGTTTTCGACAAGTCTGCCGTCCACTGTTACAATAGGTTCTGATCCCAAACCCTACAGCTAGTCCATTACCGGCTCCCAATGTCAACGCCAATGCTCTCGAAATATAAAGATTGTGCGACA ACTTCTCTCCCGCTGCGGCATTTCGTCTCGAGAGCACGCCCTCGACGTGAGTTCTACAACGAATGCAAGAAAAC TCTTCTATCACACTACATTGGTATCCACGACTCGGACAAGGTATCAGAATCATGGTTCAAAGGTACCTTTCCGTAG GAGTGATCATAACCACAAATGCCTATGGCCACCTCGACAACAAGCTGACAAAAGATCTACATCGCACTTTATACCGC GTTGGCAACTTGCTTCGACGATGTTTTTGAATAAATGTCGATCACATGAGTGGATTCAATGAAAGGTTTCATGAAG GCGCTCCCGCAAGGGGACGTGTTTCTAGACGCATTTGCAAAAAGTCTTGTGGATGCCCGAAATACTTTGGGCGGT TGGCTTCGAATATCATAGTTACCTCCACATTGGACTTCATTACGTCTATGTCCGGTGGACGTATTGACTAAGGGGAT GAAGTTCAATCAAATCTCCATAAATTGCCATGGCGTGCAGGAATATGTCCGGAATTGCCTATACATATGCTCCTT TCATTTTTCCAAAAGAGGTTCCCTTCGCTATCTACGCTCAATGCCTTCTGACATGCCAATATACATCAACCATGTGA ATGATGTTTTATCGTTCTACAAAGAAGACAAAGCAGGGGAGACAGAGAACCTCGCCTCGATATTAGGGCAGGTAC ATCCTTCCATGACAAAATATCAAATCGTCCAAGGCCTCGCGACGATGCGGCTGAAGCTGATCTACGGGTTTCGTAC GGTCTTGTCTCAATATCAACCTGCGCTTGATGCGTATAACTGTTTCCGACAAGGATACGTTTCGTTCCATGCATCGT CGGGTAGGTATAGACTGGATGAGCTTCTCGTTTTGTTGAGCCCGAGCCAATCGTGATG

>Omp10

ATGACTCTTCTACTGAGCAAGTTGAGCTTTCCGGTCTGTCCGGTGGAGTCGAGTACGCACACCACTCGAGACATCA TGCGGAATTTTCTCTCAGTGCCAGATTCCCCTCCAGCGCGGCTTCTCTGGATCCTACGTTCCACCAAGAGTGT GCGAACGTCTTGATAGAAGACTACCTCAAACCCAGCGCAGCAGTGACTCTCGAAAACCTACCCTCGCTCATGTCGT

CTTCAACCCGTTTCTAACATTGGGTGTGAGAATGGCTTCCACTGGATATGCTCATTGACTCATAACCTACCCGT  
GTATACGTCGCACTTTCACCGCATTACTTGTGTTGCTCGACGATATATTTCCCGAGAATGTCGAGCTCATGTGCGG  
TTTCAATGAACGTTTCATCAAGAATGAAACACAGGGAGAGCCTATCCTCGATGCTGTTGCGGGTCTCTTGCGGTGCG  
ACATCGAAGTACTTTAGTATGCTCAGCTCAAACCTTGATCGTAACGTCTGCGCTCAACTATGTGACTTCGTTGTCTCTT  
GACCAGGGCCTGCACTCTATCAAGCTAGCGGAACATTCCAGGAATTTGCTCGTTTGTGCAGAAACATGTCTGGAA  
TTCCTGAGGCCTTTGCTGCGTTTGTGTTCCACCGGAGGTCCCACTCACTGCATACATCCAATGTTTCCAGATTTAT  
ACACTTACGCAAACCTACGTCAATGATGTCTTGTGCTTTTACAAGGAAGATATAGCTGGAGAGACGGAGAACCTCGT  
TTCCATCCTGGCTCAAACCTCAACCCAACCTCATCGAGATACCAGGTCCTCCAGCAACTCGCTGATGAAGCTGCTGCC  
GCAAATGCGAACATTGAGATATTCTATCTGATCAAAAAGTCTATTTTGGATGCGTACGATGCTTTTCGTGTCGGGTT  
TGTGCAGTTTCATATAGACTCGCCTAGGTATAGGCTTGCTGAACTGTTTCCATGTATTGATGGTTGA

### Cloned Cytochrome P450 Reductase CPR1 from *Stereum hirsutum*

>ShCPR1

ATGGCCATCTCCTCCACGTCTGACGTGGCCGTCTCGTCTCGGCGTCGGTCTCGCTGCTCTCTTCTCTCCGCGA  
CCAGATCTTCTCGGGCTCTGGCGCAAAGACCGTCGCACCTCCCGTCAAACAACAGAATGGCGGGCGGACCCAG  
AAACTTCATTGAGAAGATGAAGGCCGGTAAGAAGCGCCTCGTCATCTTTACGGTTCGCAAACGGGTACGGCGGA  
GGAGTACGCCATTGCGATCGCCAAGGAGGCAAAGTCAAAGTTCGGTCTCGCCTCCCTCGTTTGCACCCCTGAGGA  
CTATGACTTTGAGAATCTCGACCAAGTCCCGAAGACTGCGCCGCCATCTTCGTCATGGCCACCTACGGTGAGGGT  
GAGCCCACCGACAATGCCGGCCAGCTCATGCAGAACCTTGCCGATGAATCCTTCGAGTTCTCCAACGGCGAACACA  
AACTTCCCGGTCTCAAATACGTCGTCTTTCGGTCTCGGAAACAGGACCTACGAGCACTACAATGTCATCTCCAGGCA  
GGTGCAGGACCATCTACCAAGATGGGTGCTACCCGGATCGGTGAGCGCGGTGAGGGTGACGACGACAAATCTA  
TGGAGGAGGACTACCTGGAGTGGAAGGACGGCATGTGGGAGGCATTGCGCAAGGTCATGGGCGTCGAGGAAGG  
CCAGGGAAGTGACAGTGCTGACTTCGTTGTCTCCGAGTTGGAAGAATCCGTCCCCGAAAAGGTTTACCCGCGGTGA  
ACTGTCTGCTCGTGCTTTGACCAGATCTAAGGGCATCCACGACGCCAAGAACCCGATGCTGCACCCATCGCCGAC  
GCTCACGAGCTCTTCCAGAGTCCACAGGACCGCAATTGCGTTCACATCGAGCTCAACATCGAAGGCTCCGGCATCA  
CTTACCAACACGGTGACCACGTTGGTGTCTGGCCATCAAACCCGATGTTGAAGTCGACCGTCTCCTCTGTGCTCTC  
GGTCTCCACGACAAGGCCGACGCCGTATCGGTATCGAATCACTCGACCCTGCTCTTGCCAAGGTACCTTTCCCGG  
TCCCAACGACCTACGCTACCGTCTCCGCCACTACATCGACATCAGCGCCGTGCGCGGTGCTCAGATCCTCGGTGCT  
TTCGCTAAATACGCTCCTACTCCCGAGGCCGAGGCATACCTCCGCAAGCTCAACAGTCCAAGGAAGAATACGCCG  
CTGTCGTCGCCGATGGTTGTCTCAAGATTGGTGAAGTCCTTCAACTCGCTGCTGGCAACGACATCTCCGTGCGACC  
AACCCCGAAAACACCACCGCTTGGGCCGTTCTTTGACATCATCGTCTCCGCCATCTCCCGTCTCCAGCCCCGCT  
ACTACTCCATCTCGTCTAGTCCCAAGCTCAATCCGAACCTCGATTACGTCACCTTGCCTGCTGCTCAAGTACGAGTCT  
GCTGGAGACCGTGTCCCGCAGCGCTTCTGTTTACGGTGTGGCTCGAACTACTTGCTTAACCTGAAATTGCCACAA  
ACGGCAGCTTGACAACGCGCCTTTGGTTAGCGACGGCGGTGCTAACAAGCCTGCCGCTGTCTCTGGTCCCTCGTA  
CGCGATTGAGGGTCCACGTGGGGCGCACCCGGGACGGTTCATCTACAAGGTTCCATTACGTTGCGCCGCTCGAC  
TTTACGGCTCCCGACCAACCCGAAGAGCCCTATCATCATGATTGGTCTGCTGTTACCGGCGTTGCTCCTTTCCGTGGCT  
TCGTTCAAGAGCGTGTGTCCTTCCCGCCGACAAATCGAGAAGAATGGCGCTGACGCCATCAACGACTGGGGTA  
ACATCTCGCTGTTTACGGCTGCCGTGCTCGACGGAAGACTTCTGTACAGCGACGAATGGCCGCAATACACCGA  
GGAGCTCAAGGGCAAGTTCAAGCTGCACTGTGCCTTCTCCCGGAGCCCCCGTACAAACCCGACGGCAGCAAGAT  
CTATGTCCAGGACCTCATCTGGCAGGAGCGCGCCAGGTCGCGGACGCGATTTTACCGGAAAAGGGATACGTGTA  
CATTTGCGGTGACGCGAAGAGCATGAGCAAGGCCGTGCAAGAGACCCTTGCAGATCTTGGGTGAGGCGAAGG  
GCGGTAGCGCTGAGGTGAGGGTGCGGCGGAGTTGAAGTTGATGAAGGAGAGGTCACGGTTGATGCTGGATGT  
CTGGAGTTAG

>ShCPR1

MAISSTSDVAVLVGLVGLAALFLFRDQIFSGSGAKTVAPPVKQQNGGGDPRNFIEKMKAGKKRLVIFYGSQTGTAE EYA  
 IRIAKEAKSKFGLASLVCDPEDYDFENLDQVPEDCAAIFVMATYGEGETDNAGQLMQNLADESFEFSNGEHKLPGLKY  
 VVFLGNRTYEHYNVISRQVDDHLTKMGATRIGERGEDDDKSM EEDYLEWKDGMWEAFKVMGVEEQGSDSA  
 DFVVSELEESVPEKVYRGELSARALTRSKGIHDAKNPYAAPIADAH ELFQSPQDRNCVHIELNIEGSGITYQHGDHVG  
 WPSNPDVEVDRLLCALGLHDKADAVIGIESLDPALAKVFPVPTTYATVLRHYIDISAVAGRQILGAFKAYAPTPEAEAYL  
 RKLNQSKEEYAAVVADGCLKIGEVLQLAAGNDISVAPTENTTAWAVPFDIIVSAISRLQPRYYSISSPKLNPN  
 SIHVTCV VLKYESAGDRVPQRFVYGVGSNYLLNLKFATNGSLDNAPLVSDGGANKPAAVSGPSYAIEGPRGAHRD  
 GSIYKVIHVR RSTFRLPTNPKSPIIMIGPGTGVAPFRGFVQERVALARRTIEKNGADAINDWGNISLFYGCRRSTED  
 FLYSDEWPQYTEE LKGKFKLHCAFSREPPYKPDGSKIYVQDLIWQERAQVADAILTGKGYVYICGDAKSM  
 SKAVEETLAKILGEAKGGS AEVE GAAELKLMKERSRLMLDVWS

**Accession numbers of protein sequences of *S. cerevisiae* S288c mevalonate pathway enzymes**

| Enzyme name                                   | Protein name   | Accession number |
|-----------------------------------------------|----------------|------------------|
| HMGs1 (HMG-CoA synthase)                      | ERG13, YML126C | P54839           |
| HMG1 (HMG-CoA reductase)                      | YML075C        | P12683.1         |
| MK (mevalonate kinase)                        | ERG12, YMR208W | P07277.1         |
| PMK (phosphomevalonate kinase)                | YMR220W        | P24521.2         |
| MVD1 (mevalonate pyrophosphate decarboxylase) | ERG8, YNR043W  | AAT93171.1       |



#### IV. Supplemental References

1. Quin MB, Flynn CM, Schmidt-Dannert C. 2014. Traversing the fungal terpenome. *Nat Prod Rep* 31:1449-1473. <https://doi.org/10.1039/c4np00075g>.
2. Winterberg B, Uhlmann S, Linne U, Lessing F, Marahiel MA, Eichhorn H, Kahmann R, Schirawski J. 2010. Elucidation of the complete ferrichrome A biosynthetic pathway in *Ustilago maydis*. *Mol Microbiol* 75:1260-1271. <https://doi.org/10.1111/j.1365-2958.2010.07048.x>.
3. Miao L, Chi S, Tang Y, Su Z, Yin T, Guan G, Li Y. 2011. Astaxanthin biosynthesis is enhanced by high carotenogenic gene expression and decrease of fatty acids and ergosterol in a *Phaffia rhodozyma* mutant strain. *FEMS Yeast Res* 11:192-201. <https://doi.org/10.1111/j.1567-1364.2010.00705.x>.
4. Ren A, Ouyang X, Shi L, Jiang A-L, Mu D-S, Li M-J, Han Q, Zhao M-W. 2013. Molecular characterization and expression analysis of G1HMGS, a gene encoding hydroxymethylglutaryl-CoA synthase from *Ganoderma lucidum* (Ling-zhi) in ganoderic acid biosynthesis pathway. *World J Microbiol Biotechnol* 29:523-531. <https://doi.org/10.1007/s11274-012-1206-z>.
5. Quin MB, Flynn CM, Wawrzyn GT, Choudhary S, Schmidt-Dannert C. 2013. Mushroom hunting by using bioinformatics: application of a predictive framework facilitates the selective identification of sesquiterpene synthases in basidiomycota. *Chembiochem* 14:2480-2491. <https://doi.org/10.1002/cbic.201300349>.
6. Stanke M, Steinkamp R, Waack S, Morgenstern B. 2004. AUGUSTUS: a web server for gene finding in eukaryotes. *Nucleic acids research* 32:W309-312. <https://doi.org/10.1093/nar/gkh379>.
7. Floudas D, Binder M, Riley R, Barry K, Blanchette RA, Henrissat B, Martinez AT, Otilar R, Spatafora JW, Yadav JS, Aerts A, Benoit I, Boyd A, Carlson A, Copeland A, Coutinho PM, de Vries RP, Ferreira P, Findley K, Foster B, Gaskell J, Glotzer D, Gorecki P, Heitman J, Hesse C, Hori C, Igarashi K, Jurgens JA, Kallen N, Kersten P, Kohler A, Kues U, Kumar TK, Kuo A, LaButti K, Larrondo LF, Lindquist E, Ling A, Lombard V, Lucas S, Lundell T, Martin R, McLaughlin DJ, Morgenstern I, Morin E, Murat C, Nagy LG, Nolan M, Ohm RA, Patyshakuliyeva A, et al. 2012. The Paleozoic origin of enzymatic lignin decomposition reconstructed from 31 fungal genomes. *Science* 336:1715-1719. <https://doi.org/10.1126/science.1221748>.
8. Agger S, Lopez-Gallego F, Schmidt-Dannert C. 2009. Diversity of sesquiterpene synthases in the basidiomycete *Coprinus cinereus*. *Mol Microbiol* 72:1181-1195. <https://doi.org/10.1111/j.1365-2958.2009.06717.x>.
9. Wawrzyn GT, Quin MB, Choudhary S, Lopez-Gallego F, Schmidt-Dannert C. 2012. Draft genome of *Omphalotus olearius* provides a predictive framework for sesquiterpenoid natural product biosynthesis in Basidiomycota. *Chem Biol* 19:772-783. <https://doi.org/10.1016/j.chembiol.2012.05.012>.
